# Supplementary material for: Dual-field multicollector LG-SIMS analysis of mixed U–Pu reference particles
Source: Royal Society of Chemistry journal article supplement (doi:10.1039/d5ja00115c), 2025-01-01
Supplement: d5ja00115c1.xlsx [file d5ja00115c1.xlsx]

## Sheet: Figure 1
Figure 1
Left Panel									Right Panel
U900 biweight				All individual hydride measurements (U900)					UPu-100A biweight				Estimated hydride in UPu-100A
Cycle	Hydride (biweight location)	uncertainty (biweight standard error)		Cycle	Hydride estimate	uncertainty			Cycle	Hydride (biweight location)	uncertainty (biweight standard error)		hydrideAll_cycle	hydrideAll_UH$U	+-
0	0.0012696	0.00080391		0	6.19777e-05	1.78921e-05			0	0.0008198	0.000293		0	0.00112438	0.000120546
1	0.00086066	0.00044201		1	6.25716e-05	1.80635e-05			1	0.0006345	0.0002268		1	0.000870278	9.33032e-05
2	0.00063517	0.0003242		2	6.82339e-05	1.89254e-05			2	0.000495	0.0001769		2	0.000678857	7.27808e-05
3	0.00048767	0.00021514		3	5.3365e-05	1.6876e-05			3	0.0003898	0.0001393		3	0.000534588	5.73136e-05
4	0.00038967	0.00018743		4	4.83805e-05	1.61273e-05			4	0.0003104	0.000111		4	0.000425787	4.5649e-05
5	0.00034274	0.00015172		5	5.43649e-05	1.71922e-05			5	0.0002506	8.955e-05		5	0.000343669	3.6845e-05
6	0.00027936	0.00011655		6	5.48853e-05	1.73568e-05			6	0.0002053	7.338e-05		6	0.000281622	3.01929e-05
7	0.00023271	0.00010632		7	4.40157e-05	1.55623e-05			7	0.0001711	6.115e-05		7	0.000234677	2.51599e-05
8	0.00019763	8.4597e-05		8	3.89809e-05	1.47337e-05			8	0.0001452	5.188e-05		8	0.000199093	2.1345e-05
9	0.00017364	7.7923e-05		9	8.41368e-05	2.17251e-05			9	0.0001254	4.483e-05		9	0.000172059	1.84466e-05
10	0.00014493	6.5048e-05		10	5.09377e-05	1.69798e-05			10	0.0001104	3.947e-05		10	0.000151459	1.6238e-05
11	0.00013604	6.5545e-05		11	2.85476e-05	1.27671e-05			11	9.894e-05	3.536e-05		11	0.0001357	1.45485e-05
12	0.00012298	5.7068e-05		12	3.45173e-05	1.40919e-05			12	9.011e-05	3.22e-05		12	0.000123587	1.32499e-05
13	0.00010237	4.4791e-05		13	2.90693e-05	1.30004e-05			13	8.328e-05	2.976e-05		13	0.000114219	1.22455e-05
14	0.000103	4.6323e-05		14	6.4427e-05	1.94262e-05			14	7.796e-05	2.786e-05		14	0.000106919	1.14629e-05
15	0.00010503	5.3818e-05		15	4.14009e-05	1.56485e-05			15	7.377e-05	2.636e-05		15	0.000101177	1.08473e-05
16	9.4531e-05	4.9395e-05		16	6.56234e-05	1.9787e-05			16	7.044e-05	2.517e-05		16	9.66106e-05	1.03577e-05
17	9.2996e-05	5.0034e-05		17	7.21913e-05	2.08407e-05			17	6.776e-05	2.422e-05		17	9.29307e-05	9.96317e-06
18	8.7112e-05	3.9623e-05		18	4.84303e-05	1.71232e-05			18	6.556e-05	2.343e-05		18	8.99208e-05	9.64048e-06
19	8.6957e-05	3.6076e-05		19	3.65281e-05	1.49129e-05			19	6.374e-05	2.278e-05		19	8.74177e-05	9.37212e-06
20	8.7737e-05	4.2337e-05		20	1.85608e-05	1.07162e-05			20	6.219e-05	2.223e-05		20	8.52987e-05	9.14494e-06
21	7.3338e-05	3.4234e-05		21	7.47986e-05	2.15935e-05			21	6.086e-05	2.175e-05		21	8.34714e-05	8.94903e-06
22	8.2523e-05	4.2016e-05		22	3.77164e-05	1.5398e-05			22	5.969e-05	2.133e-05		22	8.18663e-05	8.77695e-06
23	7.0171e-05	2.6579e-05		23	4.43047e-05	1.6746e-05			23	5.864e-05	2.096e-05		23	8.04311e-05	8.62308e-06
24	8.4999e-05	4.1383e-05		24	8.96907e-05	2.39721e-05			24	5.769e-05	2.062e-05		24	7.91263e-05	8.4832e-06
25	7.8684e-05	3.1199e-05		25	9.07917e-05	2.42664e-05			25	5.681e-05	2.03e-05		25	7.79225e-05	8.35413e-06
26	7.4291e-05	3.201e-05		26	4.56399e-05	1.72507e-05			26	5.599e-05	2.001e-05		26	7.67971e-05	8.23348e-06
27	7.4142e-05	3.8654e-05		27	4.62971e-05	1.74992e-05			27	5.522e-05	1.973e-05		27	7.57335e-05	8.11944e-06
28	6.6901e-05	3.5512e-05		28	1.99535e-05	1.15203e-05			28	5.448e-05	1.947e-05		28	7.47188e-05	8.01066e-06
29	7.249e-05	3.2854e-05		29	6.06605e-05	2.02209e-05			29	5.377e-05	1.922e-05		29	7.37435e-05	7.9061e-06
30	7.5692e-05	3.5328e-05		30	6.76954e-05	2.1408e-05			30	5.308e-05	1.897e-05		30	7.28004e-05	7.80499e-06
31	7.4592e-05	3.3396e-05		31	8.21381e-05	2.37124e-05			31	5.241e-05	1.873e-05		31	7.1884e-05	7.70674e-06
32	7.3822e-05	3.6906e-05		32	4.16642e-05	1.70098e-05			32	5.176e-05	1.85e-05		32	7.09902e-05	7.61091e-06
33	6.9781e-05	3.9769e-05		33	4.20032e-05	1.71482e-05			33	5.112e-05	1.827e-05		33	7.01158e-05	7.51716e-06
34	6.5845e-05	3.119e-05		34	8.54111e-05	2.46573e-05			34	5.05e-05	1.805e-05		34	6.92583e-05	7.42524e-06
35	6.1456e-05	2.4531e-05		35	5.72157e-05	2.02295e-05			35	4.988e-05	1.783e-05		35	6.84161e-05	7.33495e-06
36	7.3133e-05	3.5881e-05		36	7.28294e-05	2.30317e-05			36	4.928e-05	1.761e-05		36	6.75877e-05	7.24613e-06
37	7.1626e-05	3.4835e-05		37	5.11511e-05	1.93339e-05			37	4.868e-05	1.74e-05		37	6.67719e-05	7.15867e-06
38	6.0329e-05	3.1384e-05		38	3.69457e-05	1.6523e-05			38	4.81e-05	1.719e-05		38	6.5968e-05	7.07248e-06
39	5.9953e-05	3.0463e-05		39	5.26853e-05	1.99138e-05			39	4.752e-05	1.698e-05		39	6.51753e-05	6.98749e-06
				nan	nan	nan			40	4.695e-05	1.678e-05		nan	nan	nan
				0	5.21491e-05	1.64915e-05			41	4.639e-05	1.658e-05		0	0.000633011	0.000109822
				1	8.48413e-05	2.12114e-05			42	4.583e-05	1.638e-05		1	0.000489955	8.50028e-05
				2	4.78895e-05	1.59636e-05			43	4.528e-05	1.618e-05		2	0.000382187	6.63061e-05
				3	5.36784e-05	1.69751e-05			44	4.474e-05	1.599e-05		3	0.000300966	5.22149e-05
				4	5.967e-05	1.79918e-05			45	4.421e-05	1.58e-05		4	0.000239712	4.1588e-05
				5	2.19876e-05	1.0994e-05			46	4.368e-05	1.561e-05		5	0.000193481	3.35672e-05
				6	6.10883e-05	1.84195e-05			47	4.316e-05	1.542e-05		6	0.000158549	2.75069e-05
				7	6.69133e-05	1.9317e-05			48	4.264e-05	1.524e-05		7	0.00013212	2.29216e-05
				8	4.49343e-05	1.58871e-05			49	4.213e-05	1.506e-05		8	0.000112087	1.94461e-05
				9	3.96094e-05	1.49713e-05							9	9.6867e-05	1.68056e-05
				10	5.14782e-05	1.71599e-05							10	8.52691e-05	1.47934e-05
				11	2.87991e-05	1.28796e-05							11	7.63974e-05	1.32543e-05
				12	4.67278e-05	1.65212e-05							12	6.9578e-05	1.20712e-05
				13	7.64004e-05	2.11906e-05							13	6.43039e-05	1.11562e-05
				14	5.32574e-05	1.7753e-05							14	6.0194e-05	1.04431e-05
				15	3.56787e-05	1.45661e-05							15	5.69614e-05	9.88231e-06
				16	6.5736e-05	1.98209e-05							16	5.43904e-05	9.43626e-06
				17	4.84766e-05	1.71396e-05							17	5.23187e-05	9.07683e-06
				18	6.71955e-05	2.0261e-05							18	5.06242e-05	8.78285e-06
				19	8.66272e-05	2.31533e-05							19	4.9215e-05	8.53836e-06
				20	7.48043e-05	2.15951e-05							20	4.8022e-05	8.33139e-06
				21	4.39588e-05	1.66153e-05							21	4.69933e-05	8.15291e-06
				22	4.44211e-05	1.679e-05							22	4.60896e-05	7.99614e-06
				23	5.14398e-05	1.81873e-05							23	4.52816e-05	7.85595e-06
				24	2.59721e-05	1.29862e-05							24	4.45471e-05	7.72852e-06
				25	6.55752e-05	2.07375e-05							25	4.38693e-05	7.61093e-06
				26	5.94237e-05	1.98086e-05							26	4.32357e-05	7.50102e-06
				27	7.3519e-05	2.21678e-05							27	4.26369e-05	7.39712e-06
				28	7.39718e-05	2.23043e-05							28	4.20656e-05	7.29802e-06
				29	6.8432e-05	2.1641e-05							29	4.15166e-05	7.20276e-06
				30	4.1413e-05	1.69072e-05							30	4.09856e-05	7.11064e-06
				31	0.000118646	2.8778e-05							31	4.04697e-05	7.02114e-06
				32	5.63099e-05	1.99092e-05							32	3.99665e-05	6.93383e-06
				33	6.39187e-05	2.13071e-05							33	3.94742e-05	6.84843e-06
				34	5.74668e-05	2.03183e-05							34	3.89915e-05	6.76468e-06
				35	7.26987e-05	2.29904e-05							35	3.85173e-05	6.68242e-06
				36	3.66871e-05	1.64073e-05							36	3.80509e-05	6.6015e-06
				37	7.40265e-05	2.34103e-05							37	3.75917e-05	6.52182e-06
				38	0.000112893	2.91509e-05							38	3.71391e-05	6.4433e-06
				39	6.07608e-05	2.1483e-05							39	3.66928e-05	6.36587e-06
				nan	nan	nan							nan	nan	nan
				0	0.00173614	0.000172932							0	0.000277178	9.24723e-05
				1	0.00100621	0.000121206							1	0.000214538	7.15741e-05
				2	0.000697317	9.32217e-05							2	0.000167349	5.58312e-05
				3	0.000450425	6.95207e-05							3	0.000131785	4.3966e-05
				4	0.000474871	6.78579e-05							4	0.000104964	3.5018e-05
				5	0.000295992	5.15347e-05							5	8.47199e-05	2.82643e-05
				6	0.000282705	4.84917e-05							6	6.94244e-05	2.31614e-05
				7	0.000316202	4.93918e-05							7	5.78517e-05	1.93005e-05
				8	0.000199607	3.77267e-05							8	4.90798e-05	1.6374e-05
				9	0.000173577	3.40448e-05							9	4.24154e-05	1.41506e-05
				10	0.000184699	3.43016e-05							10	3.7337e-05	1.24564e-05
				11	0.000125317	2.80239e-05							11	3.34523e-05	1.11604e-05
				12	0.000143032	2.98269e-05							12	3.04663e-05	1.01642e-05
				13	0.000130228	2.84203e-05							13	2.81569e-05	9.39372e-06
				14	0.000117423	2.69407e-05							14	2.63573e-05	8.79334e-06
				15	8.62245e-05	2.30457e-05							15	2.49418e-05	8.32111e-06
				16	0.000122358	2.73622e-05							16	2.38161e-05	7.94553e-06
				17	4.24491e-05	1.60447e-05							17	2.29089e-05	7.64289e-06
				18	9.68553e-05	2.42152e-05							18	2.21669e-05	7.39534e-06
				19	9.0766e-05	2.3437e-05							19	2.15499e-05	7.18948e-06
				20	9.58252e-05	2.39577e-05							20	2.10275e-05	7.01521e-06
				21	5.98703e-05	1.89333e-05							21	2.05771e-05	6.86493e-06
				22	5.97745e-05	1.8903e-05							22	2.01814e-05	6.73292e-06
				23	8.39296e-05	2.24323e-05							23	1.98276e-05	6.61488e-06
				24	0.000119438	2.67091e-05							24	1.95059e-05	6.50758e-06
				25	0.000125381	2.73625e-05							25	1.92092e-05	6.40857e-06
				26	0.000119654	2.67575e-05							26	1.89317e-05	6.31601e-06
				27	7.74017e-05	2.14684e-05							27	1.86695e-05	6.22854e-06
				28	5.34633e-05	1.78217e-05							28	1.84194e-05	6.14508e-06
				29	7.10155e-05	2.05013e-05							29	1.8179e-05	6.06488e-06
				30	4.72266e-05	1.66976e-05							30	1.79465e-05	5.98731e-06
				31	8.32286e-05	2.22449e-05							31	1.77206e-05	5.91195e-06
				32	5.94536e-05	1.88015e-05							32	1.75002e-05	5.83843e-06
				33	5.31384e-05	1.77134e-05							33	1.72847e-05	5.76652e-06
				34	2.95654e-05	1.32223e-05							34	1.70733e-05	5.696e-06
				35	8.88807e-05	2.29501e-05							35	1.68657e-05	5.62674e-06
				36	5.91852e-05	1.87167e-05							36	1.66615e-05	5.5586e-06
				37	8.89652e-05	2.29719e-05							37	1.64604e-05	5.49151e-06
				38	4.7321e-05	1.6731e-05							38	1.62622e-05	5.4254e-06
				39	5.33626e-05	1.77881e-05							39	1.60668e-05	5.3602e-06
				nan	nan	nan							nan	nan	nan
				0	0.00117126	0.000137183							0	0.00031307	7.8573e-05
				1	0.000761443	0.000101799							1	0.000242318	6.0816e-05
				2	0.000660222	8.74834e-05							2	0.000189019	4.74393e-05
				3	0.000411758	6.51209e-05							3	0.000148849	3.73576e-05
				4	0.000417862	6.23068e-05							4	0.000118555	2.97545e-05
				5	0.000329352	5.34385e-05							5	9.56902e-05	2.40159e-05
				6	0.000290874	4.84875e-05							6	7.84142e-05	1.96801e-05
				7	0.000252666	4.33385e-05							7	6.53428e-05	1.63995e-05
				8	0.000186534	3.59025e-05							8	5.54351e-05	1.39129e-05
				9	0.000170979	3.35351e-05							9	4.79077e-05	1.20237e-05
				10	0.000145797	3.04035e-05							10	4.21717e-05	1.05841e-05
				11	0.000144377	3.01073e-05							11	3.7784e-05	9.48289e-06
				12	7.51352e-05	2.16906e-05							12	3.44113e-05	8.63642e-06
				13	0.000167813	3.22989e-05							13	3.18029e-05	7.98178e-06
				14	0.000142441	2.97035e-05							14	2.97703e-05	7.47163e-06
				15	0.000135427	2.88754e-05							15	2.81715e-05	7.07038e-06
				16	9.22305e-05	2.38151e-05							16	2.69e-05	6.75126e-06
				17	9.18377e-05	2.37137e-05							17	2.58754e-05	6.4941e-06
				18	7.31989e-05	2.11316e-05							18	2.50373e-05	6.28377e-06
				19	7.88104e-05	2.18591e-05							19	2.43404e-05	6.10885e-06
				20	9.06256e-05	2.34007e-05							20	2.37503e-05	5.96077e-06
				21	0.000144224	2.94421e-05							21	2.32416e-05	5.83307e-06
				22	0.000138703	2.8924e-05							22	2.27946e-05	5.72091e-06
				23	7.80958e-05	2.16609e-05							23	2.2395e-05	5.62061e-06
				24	0.000108462	2.55665e-05							24	2.20317e-05	5.52944e-06
				25	0.000108012	2.54604e-05							25	2.16965e-05	5.44531e-06
				26	9.00239e-05	2.32453e-05							26	2.13832e-05	5.36667e-06
				27	5.40468e-05	1.80162e-05							27	2.1087e-05	5.29234e-06
				28	0.000101705	2.46685e-05							28	2.08045e-05	5.22143e-06
				29	7.76438e-05	2.15355e-05							29	2.05329e-05	5.15328e-06
				30	8.94953e-05	2.31088e-05							30	2.02704e-05	5.08737e-06
				31	9.52583e-05	2.38159e-05							31	2.00152e-05	5.02334e-06
				32	0.000113512	2.60432e-05							32	1.97663e-05	4.96087e-06
				33	0.000101295	2.45692e-05							33	1.95228e-05	4.89977e-06
				34	4.75242e-05	1.68028e-05							34	1.92841e-05	4.83985e-06
				35	8.30828e-05	2.22059e-05							35	1.90496e-05	4.781e-06
				36	0.000107326	2.52985e-05							36	1.88189e-05	4.7231e-06
				37	3.57353e-05	1.45892e-05							37	1.85918e-05	4.6661e-06
				38	5.9411e-05	1.87881e-05							38	1.8368e-05	4.60992e-06
				39	6.51442e-05	1.96425e-05							39	1.81472e-05	4.55452e-06
				nan	nan	nan							nan	nan	nan
				0	0.00427385	0.000368771							0	0.000490813	9.04776e-05
				1	0.00250352	0.000289512							1	0.000379892	7.00302e-05
				2	0.00170417	0.000234323							2	0.000296334	5.46269e-05
				3	0.00156847	0.000219835							3	0.000233358	4.30177e-05
				4	0.00112388	0.00018244							4	0.000185864	3.42626e-05
				5	0.00110856	0.000179951							5	0.000150018	2.76546e-05
				6	0.00074663	0.000143753							6	0.000122933	2.26618e-05
				7	0.000767089	0.00014251							7	0.000102441	1.88842e-05
				8	0.000653492	0.00012821							8	8.6908e-05	1.60208e-05
				9	0.000585911	0.00011964							9	7.5107e-05	1.38454e-05
				10	0.000826166	0.000141756							10	6.61145e-05	1.21877e-05
				11	0.000530297	0.000113096							11	5.92357e-05	1.09196e-05
				12	0.000620593	0.000121753							12	5.39481e-05	9.94492e-06
				13	0.000526009	0.000112181							13	4.98589e-05	9.19109e-06
				14	0.000448667	0.000102959							14	4.66722e-05	8.60366e-06
				15	0.000623587	0.000122341							15	4.41658e-05	8.14162e-06
				16	0.000262879	7.92734e-05							16	4.21723e-05	7.77414e-06
				17	0.00033356	8.91655e-05							17	4.0566e-05	7.47802e-06
				18	0.000260679	7.86098e-05							18	3.92521e-05	7.23582e-06
				19	0.000397272	9.63754e-05							19	3.81595e-05	7.0344e-06
				20	0.000374832	9.37289e-05							20	3.72345e-05	6.86388e-06
				21	0.000230445	7.28833e-05							21	3.64368e-05	6.71684e-06
				22	0.000343412	8.86867e-05							22	3.57362e-05	6.58768e-06
				23	0.000433974	9.95863e-05							23	3.51097e-05	6.47219e-06
				24	0.000385098	9.34214e-05							24	3.45401e-05	6.3672e-06
				25	0.000382919	9.28928e-05							25	3.40146e-05	6.27033e-06
				26	0.000402037	9.47838e-05							26	3.35234e-05	6.17977e-06
				27	0.000313515	8.38061e-05							27	3.30591e-05	6.09418e-06
				28	0.000241443	7.28082e-05							28	3.26161e-05	6.01253e-06
				29	0.000352785	8.8215e-05							29	3.21904e-05	5.93405e-06
				30	0.000261714	7.55621e-05							30	3.17787e-05	5.85816e-06
				31	0.000282279	7.83033e-05							31	3.13787e-05	5.78442e-06
				32	0.000350581	8.76636e-05							32	3.09885e-05	5.7125e-06
				33	0.000413442	9.48735e-05							33	3.06068e-05	5.64213e-06
				34	0.000214564	6.78599e-05							34	3.02326e-05	5.57314e-06
				35	0.000194971	6.49978e-05							35	2.98649e-05	5.50536e-06
				36	0.000107814	4.82192e-05							36	2.95033e-05	5.4387e-06
				37	0.00019415	6.47241e-05							37	2.91472e-05	5.37306e-06
				38	0.000216794	6.85651e-05							38	2.87963e-05	5.30837e-06
				39	0.000239658	7.22701e-05							39	2.84502e-05	5.24458e-06
				nan	nan	nan							nan	nan	nan
				0	0.00294333	0.000312536							0	0.000629193	0.000107808
				1	0.00213185	0.00026476							1	0.000486999	8.34441e-05
				2	0.00182917	0.000240444							2	0.000379882	6.50903e-05
				3	0.00146552	0.000211715							3	0.00029915	5.12575e-05
				4	0.00138458	0.000202129							4	0.000238267	4.08254e-05
				5	0.000918517	0.000162462							5	0.000192314	3.29517e-05
				6	0.00113178	0.000174755							6	0.000157593	2.70026e-05
				7	0.000931158	0.000155279							7	0.000131323	2.25013e-05
				8	0.00056947	0.000118783							8	0.000111411	1.90895e-05
				9	0.000563883	0.000117617							9	9.62827e-05	1.64974e-05
				10	0.000556902	0.000116161							10	8.47548e-05	1.45222e-05
				11	0.00082237	0.000141104							11	7.59366e-05	1.30112e-05
				12	0.000457093	0.000104893							12	6.91583e-05	1.18498e-05
				13	0.00055157	0.000115048							13	6.39161e-05	1.09516e-05
				14	0.000525433	0.000112058							14	5.9831e-05	1.02516e-05
				15	0.000358267	9.25239e-05							15	5.66179e-05	9.7011e-06
				16	0.000354447	9.15372e-05							16	5.40624e-05	9.26323e-06
				17	0.000215274	7.17672e-05							17	5.20031e-05	8.9104e-06
				18	0.000426405	0.00010053							18	5.03188e-05	8.6218e-06
				19	0.000354522	9.15566e-05							19	4.89181e-05	8.3818e-06
				20	0.000563955	0.000115156							20	4.77324e-05	8.17863e-06
				21	0.000348344	8.99608e-05							21	4.67098e-05	8.00342e-06
				22	0.000276663	7.9879e-05							22	4.58116e-05	7.84952e-06
				23	0.000346581	8.95052e-05							23	4.50085e-05	7.71191e-06
				24	0.000226416	7.16087e-05							24	4.42784e-05	7.58681e-06
				25	0.000338054	8.73028e-05							25	4.36047e-05	7.47138e-06
				26	0.000404916	9.54628e-05							26	4.2975e-05	7.36348e-06
				27	0.000336725	8.69596e-05							27	4.23797e-05	7.26149e-06
				28	0.000287013	7.96167e-05							28	4.18119e-05	7.1642e-06
				29	0.000393818	9.28457e-05							29	4.12662e-05	7.07069e-06
				30	0.000198167	6.60635e-05							30	4.07384e-05	6.98026e-06
				31	0.000218836	6.9211e-05							31	4.02256e-05	6.8924e-06
				32	0.000327766	8.46453e-05							32	3.97254e-05	6.80669e-06
				33	0.000240546	7.25376e-05							33	3.92361e-05	6.72285e-06
				34	0.000239195	7.21304e-05							34	3.87563e-05	6.64064e-06
				35	0.000304444	8.13808e-05							35	3.8285e-05	6.55989e-06
				36	0.000172534	6.10062e-05							36	3.78214e-05	6.48045e-06
				37	0.000174785	6.18024e-05							37	3.73649e-05	6.40224e-06
				38	0.000261863	7.56052e-05							38	3.69151e-05	6.32516e-06
				39	0.000261202	7.54142e-05							39	3.64715e-05	6.24915e-06
				nan	nan	nan							nan	nan	nan
				0	0.00010896	2.17935e-05							0	0.000878127	0.00010304
				1	3.94567e-05	1.31525e-05							1	0.000679676	7.97532e-05
				2	6.11105e-05	1.63331e-05							2	0.000530179	6.22112e-05
				3	8.72912e-05	1.95199e-05							3	0.000417506	4.89902e-05
				4	7.89405e-05	1.86073e-05							4	0.000332534	3.90196e-05
				5	7.39154e-05	1.79279e-05							5	0.000268401	3.14942e-05
				6	9.11312e-05	1.98875e-05							6	0.000219943	2.58082e-05
				7	3.91559e-05	1.30523e-05							7	0.00018328	2.15061e-05
				8	6.06293e-05	1.62044e-05							8	0.000155489	1.82451e-05
				9	6.05864e-05	1.6193e-05							9	0.000134376	1.57677e-05
				10	6.05233e-05	1.61761e-05							10	0.000118287	1.38798e-05
				11	5.59871e-05	1.55285e-05							11	0.00010598	1.24357e-05
				12	3.86873e-05	1.28961e-05							12	9.65201e-05	1.13257e-05
				13	3.86315e-05	1.28775e-05							13	8.92038e-05	1.04672e-05
				14	7.28827e-05	1.76774e-05							14	8.35025e-05	9.79819e-06
				15	5.54351e-05	1.53755e-05							15	7.90182e-05	9.272e-06
				16	3.83478e-05	1.27829e-05							16	7.54516e-05	8.8535e-06
				17	4.24149e-05	1.34131e-05							17	7.25777e-05	8.51627e-06
				18	4.66031e-05	1.40517e-05							18	7.0227e-05	8.24044e-06
				19	6.32724e-05	1.63375e-05							19	6.82721e-05	8.01106e-06
				20	6.7472e-05	1.68687e-05							20	6.66172e-05	7.81687e-06
				21	5.03571e-05	1.45373e-05							21	6.51901e-05	7.64941e-06
				22	5.8949e-05	1.57553e-05							22	6.39365e-05	7.50232e-06
				23	4.19696e-05	1.32723e-05							23	6.28156e-05	7.37079e-06
				24	5.85801e-05	1.56567e-05							24	6.17966e-05	7.25123e-06
				25	2.92936e-05	1.10721e-05							25	6.08564e-05	7.1409e-06
				26	7.47964e-05	1.76305e-05							26	5.99776e-05	7.03777e-06
				27	3.32211e-05	1.17457e-05							27	5.91468e-05	6.9403e-06
				28	2.90079e-05	1.09642e-05							28	5.83544e-05	6.84731e-06
				29	4.54733e-05	1.37111e-05							29	5.75927e-05	6.75794e-06
				30	4.96806e-05	1.4342e-05							30	5.68562e-05	6.67151e-06
				31	3.71387e-05	1.23799e-05							31	5.61405e-05	6.58753e-06
				32	3.71741e-05	1.23917e-05							32	5.54424e-05	6.50562e-06
				33	3.29333e-05	1.16439e-05							33	5.47595e-05	6.42549e-06
				34	2.88712e-05	1.09125e-05							34	5.40899e-05	6.34691e-06
				35	4.11731e-05	1.30204e-05							35	5.34321e-05	6.26973e-06
				36	6.15425e-05	1.58908e-05							36	5.27851e-05	6.19381e-06
				37	6.57054e-05	1.6427e-05							37	5.2148e-05	6.11905e-06
				38	2.45806e-05	1.00351e-05							38	5.15202e-05	6.04538e-06
				39	3.68598e-05	1.22869e-05							39	5.0901e-05	5.97273e-06
				nan	nan	nan							nan	nan	nan
				0	4.39129e-05	1.38869e-05							0	0.000551018	5.81679e-05
				1	9.66642e-05	2.06101e-05							1	0.000426492	4.50223e-05
				2	5.69882e-05	1.58062e-05							2	0.000332683	3.51195e-05
				3	7.05085e-05	1.76279e-05							3	0.000261982	2.7656e-05
				4	0.000109458	2.1893e-05							4	0.000208663	2.20274e-05
				5	4.38826e-05	1.38773e-05							5	0.000168419	1.77791e-05
				6	7.02242e-05	1.75568e-05							6	0.000138013	1.45692e-05
				7	5.6839e-05	1.57648e-05							7	0.000115007	1.21406e-05
				8	8.30913e-05	1.90634e-05							8	9.75685e-05	1.02998e-05
				9	7.3923e-05	1.79298e-05							9	8.432e-05	8.90118e-06
				10	5.64403e-05	1.56542e-05							10	7.42244e-05	7.83544e-06
				11	6.50381e-05	1.67934e-05							11	6.65018e-05	7.02021e-06
				12	3.89941e-05	1.29983e-05							12	6.05656e-05	6.39357e-06
				13	5.17514e-05	1.49398e-05							13	5.59748e-05	5.90894e-06
				14	5.60929e-05	1.55579e-05							14	5.23972e-05	5.53127e-06
				15	5.99169e-05	1.6014e-05							15	4.95833e-05	5.23423e-06
				16	5.11777e-05	1.47742e-05							16	4.73453e-05	4.99798e-06
				17	4.68613e-05	1.41296e-05							17	4.5542e-05	4.80761e-06
				18	7.20474e-05	1.74748e-05							18	4.40669e-05	4.65189e-06
				19	7.21099e-05	1.749e-05							19	4.28402e-05	4.5224e-06
				20	2.96201e-05	1.11956e-05							20	4.18018e-05	4.41278e-06
				21	5.9083e-05	1.57912e-05							21	4.09063e-05	4.31825e-06
				22	6.74247e-05	1.68569e-05							22	4.01197e-05	4.23521e-06
				23	4.20374e-05	1.32937e-05							23	3.94163e-05	4.16096e-06
				24	2.92769e-05	1.10658e-05							24	3.8777e-05	4.09346e-06
				25	7.96447e-05	1.82726e-05							25	3.8187e-05	4.03118e-06
				26	9.61653e-05	2.0053e-05							26	3.76355e-05	3.97296e-06
				27	5.00835e-05	1.44583e-05							27	3.71142e-05	3.91794e-06
				28	5.40934e-05	1.50033e-05							28	3.6617e-05	3.86544e-06
				29	5.00347e-05	1.44442e-05							29	3.6139e-05	3.81499e-06
				30	6.25902e-05	1.61613e-05							30	3.56768e-05	3.7662e-06
				31	3.73767e-05	1.24592e-05							31	3.52277e-05	3.71879e-06
				32	4.15173e-05	1.31292e-05							32	3.47897e-05	3.67255e-06
				33	4.56023e-05	1.375e-05							33	3.43612e-05	3.62731e-06
				34	2.89576e-05	1.09452e-05							34	3.3941e-05	3.58296e-06
				35	4.52631e-05	1.36477e-05							35	3.35283e-05	3.53939e-06
				36	3.71245e-05	1.23751e-05							36	3.31223e-05	3.49653e-06
				37	5.34961e-05	1.48376e-05							37	3.27225e-05	3.45433e-06
				38	4.54122e-05	1.36927e-05							38	3.23285e-05	3.41274e-06
				39	6.58514e-05	1.64635e-05							39	3.194e-05	3.37173e-06
				nan	nan	nan							nan	nan	nan
				0	0.00118283	0.000165746							0	0.000552332	9.87619e-05
				1	0.000842858	0.000133335							1	0.000427509	7.64423e-05
				2	0.000983295	0.00013777							2	0.000333477	5.96286e-05
				3	0.000651645	0.00010865							3	0.000262607	4.69564e-05
				4	0.000444534	8.72035e-05							4	0.00020916	3.73997e-05
				5	0.000454733	8.59598e-05							5	0.000168821	3.01867e-05
				6	0.000365403	7.46038e-05							6	0.000138342	2.47367e-05
				7	0.000411662	7.64625e-05							7	0.000115281	2.06132e-05
				8	0.000311289	6.49202e-05							8	9.78011e-05	1.74877e-05
				9	0.000238449	5.62109e-05							9	8.4521e-05	1.51131e-05
				10	0.000265217	5.93138e-05							10	7.44013e-05	1.33036e-05
				11	0.000256488	5.88514e-05							11	6.66603e-05	1.19195e-05
				12	0.000203119	5.24514e-05							12	6.07101e-05	1.08555e-05
				13	0.000234195	5.68085e-05							13	5.61082e-05	1.00326e-05
				14	0.000279048	6.24074e-05							14	5.25221e-05	9.39142e-06
				15	0.000226265	5.6574e-05							15	4.97016e-05	8.88708e-06
				16	0.000270474	6.20611e-05							16	4.74582e-05	8.48595e-06
				17	0.000287773	6.4359e-05							17	4.56506e-05	8.16272e-06
				18	0.000203463	5.43843e-05							18	4.4172e-05	7.89834e-06
				19	0.000189489	5.25608e-05							19	4.29424e-05	7.67848e-06
				20	0.000117923	4.1695e-05							20	4.19015e-05	7.49235e-06
				21	8.88697e-05	3.62828e-05							21	4.10038e-05	7.33185e-06
				22	8.98285e-05	3.66743e-05							22	4.02154e-05	7.19086e-06
				23	0.000163949	4.94372e-05							23	3.95103e-05	7.06479e-06
				24	0.000211364	5.64965e-05							24	3.88694e-05	6.95019e-06
				25	0.000180265	5.20436e-05							25	3.8278e-05	6.84445e-06
				26	0.000165352	4.98605e-05							26	3.77252e-05	6.7456e-06
				27	0.000119746	4.23397e-05							27	3.72027e-05	6.65217e-06
				28	0.000151361	4.78688e-05							28	3.67043e-05	6.56305e-06
				29	0.000210607	5.62941e-05							29	3.62252e-05	6.47738e-06
				30	0.000138033	4.60149e-05							30	3.57619e-05	6.39454e-06
				31	0.000106555	4.02764e-05							31	3.53117e-05	6.31405e-06
				32	0.00022926	5.92029e-05							32	3.48727e-05	6.23554e-06
				33	0.000195905	5.43408e-05							33	3.44431e-05	6.15873e-06
				34	0.000275589	6.49676e-05							34	3.40219e-05	6.08342e-06
				35	0.000244406	6.11105e-05							35	3.36082e-05	6.00944e-06
				36	0.000184062	5.31399e-05							36	3.32012e-05	5.93667e-06
				37	0.000169608	5.1144e-05							37	3.28005e-05	5.86502e-06
				38	0.000168181	5.07136e-05							38	3.24056e-05	5.79441e-06
				39	0.000231925	5.9891e-05							39	3.20162e-05	5.72478e-06
				nan	nan	nan							nan	nan	nan
				0	0.00113571	0.000159139							0	0.000685464	7.90078e-05
				1	0.000809658	0.00012808							1	0.000530553	6.11526e-05
				2	0.000769041	0.000120159							2	0.000413856	4.77018e-05
				3	0.000749886	0.000114408							3	0.000325904	3.75643e-05
				4	0.000538316	9.51925e-05							4	0.000259575	2.99192e-05
				5	0.000490168	8.80627e-05							5	0.000209513	2.41489e-05
				6	0.0003831	7.51493e-05							6	0.000171687	1.9789e-05
				7	0.000333629	6.81155e-05							7	0.000143068	1.64902e-05
				8	0.000174056	4.82794e-05							8	0.000121375	1.39899e-05
				9	0.000305582	6.37299e-05							9	0.000104894	1.20902e-05
				10	0.000215029	5.37643e-05							10	9.23346e-05	1.06427e-05
				11	0.000285704	6.23564e-05							11	8.27278e-05	9.53536e-06
				12	0.00026095	5.98753e-05							12	7.53433e-05	8.68421e-06
				13	0.00023618	5.729e-05							13	6.96323e-05	8.02595e-06
				14	0.000239747	5.81554e-05							14	6.51818e-05	7.51298e-06
				15	0.000272112	6.24369e-05							15	6.16814e-05	7.10951e-06
				16	0.000201555	5.38744e-05							16	5.88973e-05	6.78862e-06
				17	0.000175259	5.05983e-05							17	5.66539e-05	6.53004e-06
				18	0.000176477	5.09499e-05							18	5.4819e-05	6.31854e-06
				19	0.000103186	3.90032e-05							19	5.3293e-05	6.14265e-06
				20	0.000281861	6.46743e-05							20	5.20012e-05	5.99376e-06
				21	0.000208676	5.57778e-05							21	5.08872e-05	5.86535e-06
				22	0.000239638	5.9918e-05							22	4.99087e-05	5.75257e-06
				23	0.00025684	6.23024e-05							23	4.90337e-05	5.65172e-06
				24	0.000347789	7.25342e-05							24	4.82383e-05	5.56004e-06
				25	0.000181269	5.23335e-05							25	4.75044e-05	5.47544e-06
				26	0.000183149	5.28763e-05							26	4.68183e-05	5.39637e-06
				27	0.000212428	5.67809e-05							27	4.61699e-05	5.32163e-06
				28	0.000106317	4.01867e-05							28	4.55513e-05	5.25033e-06
				29	0.000291048	6.67827e-05							29	4.49567e-05	5.1818e-06
				30	0.000168226	5.0727e-05							30	4.43818e-05	5.11553e-06
				31	0.000275038	6.48378e-05							31	4.38231e-05	5.05113e-06
				32	0.000138068	4.60265e-05							32	4.32782e-05	4.98833e-06
				33	0.000183944	5.31059e-05							33	4.27451e-05	4.92688e-06
				34	0.000261905	6.35313e-05							34	4.22224e-05	4.86663e-06
				35	0.000200835	5.57082e-05							35	4.17089e-05	4.80745e-06
				36	0.000108144	4.0877e-05							36	4.12039e-05	4.74924e-06
				37	0.000170544	5.14261e-05							37	4.07066e-05	4.69192e-06
				38	9.31438e-05	3.80279e-05							38	4.02165e-05	4.63543e-06
				39	0.000232397	6.0013e-05							39	3.97332e-05	4.57973e-06
				nan	nan	nan							nan	nan	nan
				0	0.00138481	0.000230992							0	0.000951767	7.85019e-05
				1	0.000846435	0.000176583							1	0.000736674	6.0761e-05
				2	0.000705225	0.000153957							2	0.00057464	4.73964e-05
				3	0.000460308	0.000118884							3	0.000452519	3.73238e-05
				4	0.000172212	7.03123e-05							4	0.000360421	2.97276e-05
				5	0.000327049	9.44294e-05							5	0.000290909	2.39942e-05
				6	0.000283573	8.55149e-05							6	0.000238388	1.96623e-05
				7	0.000267992	8.08157e-05							7	0.00019865	1.63847e-05
				8	0.000251369	7.58019e-05							8	0.000168529	1.39003e-05
				9	0.000261834	7.55967e-05							9	0.000145645	1.20128e-05
				10	0.000125455	5.12207e-05							10	0.000128207	1.05745e-05
				11	0.000142341	5.38044e-05							11	0.000114868	9.47431e-06
				12	0.000162213	5.73566e-05							12	0.000104614	8.62861e-06
				13	0.000101622	4.54497e-05							13	9.66845e-05	7.97455e-06
				14	0.000140885	5.32539e-05							14	9.0505e-05	7.46487e-06
				15	9.99136e-05	4.46854e-05							15	8.56447e-05	7.06399e-06
				16	0.000160179	5.66372e-05							16	8.1779e-05	6.74515e-06
				17	0.00010051	4.49524e-05							17	7.86641e-05	6.48823e-06
				18	0.000101027	4.51832e-05							18	7.61162e-05	6.27808e-06
				19	8.04683e-05	4.02361e-05							19	7.39974e-05	6.10332e-06
				20	0.000141263	5.33969e-05							20	7.22037e-05	5.95538e-06
				21	0.000181859	6.06263e-05							21	7.06569e-05	5.8278e-06
				22	0.000222939	6.72277e-05							22	6.92982e-05	5.71573e-06
				23	8.0512e-05	4.0258e-05							23	6.80834e-05	5.61553e-06
				24	6.06123e-05	3.49958e-05							24	6.69789e-05	5.52444e-06
				25	0.000140959	5.32818e-05							25	6.59599e-05	5.44038e-06
				26	0.000161905	5.72474e-05							26	6.50073e-05	5.36181e-06
				27	6.08522e-05	3.51343e-05							27	6.41069e-05	5.28755e-06
				28	0.000140669	5.31725e-05							28	6.3248e-05	5.21671e-06
				29	0.000120615	4.92444e-05							29	6.24225e-05	5.14862e-06
				30	8.01295e-05	4.00667e-05							30	6.16241e-05	5.08277e-06
				31	0.000100519	4.4956e-05							31	6.08484e-05	5.01879e-06
				32	0.000159843	5.65183e-05							32	6.00918e-05	4.95638e-06
				33	6.00502e-05	3.46713e-05							33	5.93516e-05	4.89533e-06
				34	0.000140297	5.30317e-05							34	5.86259e-05	4.83547e-06
				35	6.03549e-05	3.48471e-05							35	5.79129e-05	4.77667e-06
				36	0.000120079	4.90255e-05							36	5.72117e-05	4.71883e-06
				37	0.000157521	5.56975e-05							37	5.65211e-05	4.66188e-06
				38	3.97944e-05	2.81395e-05							38	5.58407e-05	4.60575e-06
				39	8.01504e-05	4.00771e-05							39	5.51696e-05	4.5504e-06
				nan	nan	nan							nan	nan	nan
				0	0.000834552	0.000178016							0	0.000126507	9.95397e-05
				1	0.000743386	0.000162293							1	9.79175e-05	7.70443e-05
				2	0.000646097	0.000144528							2	7.63802e-05	6.00982e-05
				3	0.000473368	0.000118376							3	6.0148e-05	4.73262e-05
				4	0.000392485	0.000104921							4	4.79066e-05	3.76943e-05
				5	0.000533803	0.0001194							5	3.86671e-05	3.04244e-05
				6	0.000253235	8.00922e-05							6	3.16861e-05	2.49316e-05
				7	0.000166048	6.27667e-05							7	2.64042e-05	2.07756e-05
				8	0.000156934	5.93211e-05							8	2.24006e-05	1.76254e-05
				9	0.000256087	7.39373e-05							9	1.93589e-05	1.52321e-05
				10	0.000165766	5.86128e-05							10	1.7041e-05	1.34084e-05
				11	0.000183526	6.1182e-05							11	1.5268e-05	1.20133e-05
				12	0.000183212	6.10773e-05							12	1.39052e-05	1.0941e-05
				13	0.000102505	4.58443e-05							13	1.28511e-05	1.01117e-05
				14	0.000121678	4.96784e-05							14	1.20298e-05	9.46538e-06
				15	8.08315e-05	4.04177e-05							15	1.13837e-05	8.95707e-06
				16	0.000182713	6.0911e-05							16	1.08699e-05	8.55278e-06
				17	0.000181702	6.05738e-05							17	1.04559e-05	8.22701e-06
				18	0.000100299	4.48578e-05							18	1.01172e-05	7.96054e-06
				19	8.02554e-05	4.01296e-05							19	9.83562e-06	7.73895e-06
				20	0.000181504	6.05078e-05							20	9.5972e-06	7.55136e-06
				21	8.02828e-05	4.01433e-05							21	9.39161e-06	7.38959e-06
				22	6.1006e-05	3.52231e-05							22	9.21101e-06	7.24749e-06
				23	6.08957e-05	3.51595e-05							23	9.04953e-06	7.12043e-06
				24	0.000202488	6.40401e-05							24	8.90273e-06	7.00493e-06
				25	0.000120893	4.93578e-05							25	8.76728e-06	6.89835e-06
				26	8.11103e-05	4.05571e-05							26	8.64067e-06	6.79873e-06
				27	0.000121747	4.97066e-05							27	8.52099e-06	6.70456e-06
				28	0.000181706	6.05751e-05							28	8.40682e-06	6.61473e-06
				29	8.08855e-05	4.04447e-05							29	8.29709e-06	6.52839e-06
				30	0.000120783	4.93131e-05							30	8.19098e-06	6.4449e-06
				31	0.000161676	5.71666e-05							31	8.08788e-06	6.36378e-06
				32	0.000140532	5.31204e-05							32	7.98731e-06	6.28465e-06
				33	0.000222665	6.71449e-05							33	7.88892e-06	6.20724e-06
				34	0.000142029	5.36866e-05							34	7.79246e-06	6.13133e-06
				35	4.04149e-05	2.85784e-05							35	7.69769e-06	6.05677e-06
				36	0.000139129	5.259e-05							36	7.60448e-06	5.98343e-06
				37	6.1103e-05	3.52791e-05							37	7.5127e-06	5.91121e-06
				38	6.04952e-05	3.49282e-05							38	7.42225e-06	5.84004e-06
				39	4.50999e-20	2.02858e-05							39	7.33306e-06	5.76986e-06
				nan	nan	nan							nan	nan	nan
				0	0.00205848	0.000152772							0	0.000601523	9.6845e-05
				1	0.00117181	0.000106603							1	0.000465583	7.49586e-05
				2	0.000855867	8.43742e-05							2	0.000363176	5.84712e-05
				3	0.000618477	6.71081e-05							3	0.000285995	4.6045e-05
				4	0.000531746	5.91017e-05							4	0.000227788	3.66738e-05
				5	0.000465955	5.31153e-05							5	0.000183856	2.96008e-05
				6	0.000367932	4.56464e-05							6	0.000150663	2.42566e-05
				7	0.000283467	3.85816e-05							7	0.000125548	2.02131e-05
				8	0.000283357	3.7213e-05							8	0.000106511	1.71483e-05
				9	0.000287344	3.62082e-05							9	9.20485e-05	1.48198e-05
				10	0.000215826	3.05264e-05							10	8.10275e-05	1.30454e-05
				11	0.000231483	3.12175e-05							11	7.25971e-05	1.16881e-05
				12	0.000139745	2.39681e-05							12	6.61169e-05	1.06448e-05
				13	0.000113607	2.14711e-05							13	6.11052e-05	9.83792e-06
				14	0.000129115	2.28263e-05							14	5.71998e-05	9.20914e-06
				15	0.000143832	2.39741e-05							15	5.4128e-05	8.71458e-06
				16	0.000122728	2.20442e-05							16	5.16849e-05	8.32124e-06
				17	0.000137559	2.32537e-05							17	4.97162e-05	8.00429e-06
				18	0.000129109	2.24768e-05							18	4.8106e-05	7.74504e-06
				19	0.000128069	2.22957e-05							19	4.67669e-05	7.52944e-06
				20	0.000148131	2.40322e-05							20	4.56332e-05	7.34693e-06
				21	7.3537e-05	1.68713e-05							21	4.46557e-05	7.18954e-06
				22	6.96322e-05	1.64132e-05							22	4.3797e-05	7.05129e-06
				23	9.60942e-05	1.92199e-05							23	4.30291e-05	6.92767e-06
				24	9.61379e-05	1.92287e-05							24	4.23311e-05	6.81529e-06
				25	5.7507e-05	1.48488e-05							25	4.16871e-05	6.7116e-06
				26	8.03075e-05	1.75254e-05							26	4.1085e-05	6.61467e-06
				27	0.000114806	2.09621e-05							27	4.0516e-05	6.52306e-06
				28	7.22767e-05	1.65821e-05							28	3.99732e-05	6.43566e-06
				29	8.72497e-05	1.81938e-05							29	3.94514e-05	6.35166e-06
				30	7.96631e-05	1.73847e-05							30	3.89469e-05	6.27043e-06
				31	9.45093e-05	1.89029e-05							31	3.84566e-05	6.1915e-06
				32	9.06381e-05	1.85024e-05							32	3.79784e-05	6.11451e-06
				33	8.6823e-05	1.81048e-05							33	3.75106e-05	6.0392e-06
				34	9.78919e-05	1.91993e-05							34	3.70519e-05	5.96535e-06
				35	9.00051e-05	1.83732e-05							35	3.66014e-05	5.8928e-06
				36	8.2245e-05	1.75356e-05							36	3.61582e-05	5.82145e-06
				37	8.58157e-05	1.78947e-05							37	3.57217e-05	5.75118e-06
				38	0.000122961	2.14063e-05							38	3.52917e-05	5.68194e-06
				39	7.08077e-05	1.62451e-05							39	3.48676e-05	5.61366e-06
				nan	nan	nan							nan	nan	nan
				0	0.00158286	0.000128934							0	0.000908377	9.57235e-05
				1	0.00108387	9.90082e-05							1	0.00070309	7.40906e-05
				2	0.000696109	7.38185e-05							2	0.000548443	5.77941e-05
				3	0.000621766	6.55645e-05							3	0.000431889	4.55118e-05
				4	0.000498484	5.61007e-05							4	0.00034399	3.62492e-05
				5	0.000371333	4.6794e-05							5	0.000277647	2.9258e-05
				6	0.000361833	4.45483e-05							6	0.00022752	2.39757e-05
				7	0.00029044	3.84764e-05							7	0.000189593	1.99791e-05
				8	0.00025577	3.48113e-05							8	0.000160846	1.69497e-05
				9	0.00021845	3.12113e-05							9	0.000139005	1.46482e-05
				10	0.000195973	2.88981e-05							10	0.000122362	1.28943e-05
				11	0.000170832	2.66822e-05							11	0.000109631	1.15528e-05
				12	0.000184943	2.75727e-05							12	9.98451e-05	1.05215e-05
				13	0.000158796	2.54301e-05							13	9.22768e-05	9.724e-06
				14	0.000128848	2.27791e-05							14	8.6379e-05	9.1025e-06
				15	0.000172164	2.62575e-05							15	8.17402e-05	8.61367e-06
				16	0.000131053	2.28151e-05							16	7.80508e-05	8.22489e-06
				17	9.47313e-05	1.93381e-05							17	7.50779e-05	7.9116e-06
				18	0.000137139	2.31826e-05							18	7.26462e-05	7.65535e-06
				19	0.000144696	2.37899e-05							19	7.0624e-05	7.44226e-06
				20	0.000117443	2.14436e-05							20	6.89121e-05	7.26186e-06
				21	9.36532e-05	1.9118e-05							21	6.74358e-05	7.10629e-06
				22	0.000104828	2.01753e-05							22	6.6139e-05	6.96964e-06
				23	8.89097e-05	1.85399e-05							23	6.49795e-05	6.84745e-06
				24	0.000100218	1.96556e-05							24	6.39255e-05	6.73638e-06
				25	0.00010008	1.96286e-05							25	6.29529e-05	6.63389e-06
				26	0.000111266	2.0663e-05							26	6.20437e-05	6.53808e-06
				27	0.000126487	2.20202e-05							27	6.11844e-05	6.44752e-06
				28	0.000141153	2.32074e-05							28	6.03646e-05	6.36114e-06
				29	0.000102989	1.98215e-05							29	5.95767e-05	6.27811e-06
				30	0.000102721	1.97699e-05							30	5.88148e-05	6.19782e-06
				31	9.1079e-05	1.85924e-05							31	5.80744e-05	6.1198e-06
				32	7.95774e-05	1.73661e-05							32	5.73523e-05	6.04371e-06
				33	6.80362e-05	1.60369e-05							33	5.66459e-05	5.96926e-06
				34	8.67886e-05	1.80976e-05							34	5.59532e-05	5.89627e-06
				35	8.65618e-05	1.80503e-05							35	5.52728e-05	5.82457e-06
				36	6.02071e-05	1.50523e-05							36	5.46035e-05	5.75404e-06
				37	9.7275e-05	1.90783e-05							37	5.39444e-05	5.68459e-06
				38	7.49412e-05	1.67581e-05							38	5.3295e-05	5.61615e-06
				39	8.5603e-05	1.78504e-05							39	5.26545e-05	5.54866e-06
				nan	nan	nan							nan	nan	nan
				0	0.00153908	0.000141217							0	0.000761297	0.000109105
				1	0.00114592	0.000111907							1	0.000589249	8.44482e-05
				2	0.000639936	7.70686e-05							2	0.000459641	6.58735e-05
				3	0.000563251	6.68681e-05							3	0.000361959	5.18742e-05
				4	0.000462954	5.74383e-05							4	0.000288293	4.13167e-05
				5	0.000421289	5.26745e-05							5	0.000232691	3.33482e-05
				6	0.000284568	4.19645e-05							6	0.000190681	2.73275e-05
				7	0.000259047	3.86225e-05							7	0.000158895	2.27721e-05
				8	0.000223182	3.44423e-05							8	0.000134802	1.93192e-05
				9	0.000235851	3.4047e-05							9	0.000116498	1.66959e-05
				10	0.000185119	2.92731e-05							10	0.00010255	1.46969e-05
				11	0.000173645	2.78084e-05							11	9.188e-05	1.31678e-05
				12	0.000125967	2.33933e-05							12	8.36786e-05	1.19924e-05
				13	9.411e-05	2.00654e-05							13	7.73357e-05	1.10834e-05
				14	0.000122643	2.27759e-05							14	7.23929e-05	1.0375e-05
				15	0.000118151	2.23301e-05							15	6.85052e-05	9.81783e-06
				16	0.000109108	2.13993e-05							16	6.54132e-05	9.37469e-06
				17	0.00010073	2.05626e-05							17	6.29216e-05	9.01761e-06
				18	0.000146388	2.47463e-05							18	6.08836e-05	8.72554e-06
				19	9.20158e-05	1.96189e-05							19	5.91889e-05	8.48266e-06
				20	7.09831e-05	1.72167e-05							20	5.77541e-05	8.27704e-06
				21	0.000104251	2.08514e-05							21	5.65169e-05	8.09972e-06
				22	6.69714e-05	1.67435e-05							22	5.54301e-05	7.94397e-06
				23	8.76887e-05	1.91362e-05							23	5.44583e-05	7.8047e-06
				24	9.61358e-05	2.00469e-05							24	5.35749e-05	7.6781e-06
				25	7.50536e-05	1.76911e-05							25	5.27598e-05	7.56128e-06
				26	5.81963e-05	1.55542e-05							26	5.19979e-05	7.45208e-06
				27	6.22471e-05	1.60727e-05							27	5.12777e-05	7.34886e-06
				28	7.43674e-05	1.75293e-05							28	5.05907e-05	7.2504e-06
				29	4.96206e-05	1.43247e-05							29	4.99303e-05	7.15577e-06
				30	0.000115805	2.18865e-05							30	4.92918e-05	7.06425e-06
				31	3.72614e-05	1.24207e-05							31	4.86713e-05	6.97533e-06
				32	4.95239e-05	1.42967e-05							32	4.80661e-05	6.8886e-06
				33	8.62124e-05	1.88141e-05							33	4.7474e-05	6.80375e-06
				34	4.11316e-05	1.30073e-05							34	4.68935e-05	6.72055e-06
				35	6.56664e-05	1.64173e-05							35	4.63232e-05	6.63882e-06
				36	9.40655e-05	1.96151e-05							36	4.57623e-05	6.55843e-06
				37	6.13851e-05	1.58502e-05							37	4.521e-05	6.47927e-06
				38	8.55123e-05	1.86613e-05							38	4.46657e-05	6.40126e-06
				39	5.2844e-05	1.46568e-05							39	4.41289e-05	6.32434e-06
				nan	nan	nan							nan	nan	nan
				0	0.00136531	0.000127979							0	0.000469482	7.11196e-05
				1	0.00103644	0.000102187							1	0.000363382	5.5047e-05
				2	0.000688538	7.70129e-05							2	0.000283455	4.29393e-05
				3	0.000563986	6.51457e-05							3	0.000223215	3.38139e-05
				4	0.000453995	5.58982e-05							4	0.000177786	2.6932e-05
				5	0.000371519	4.87938e-05							5	0.000143498	2.17378e-05
				6	0.000317015	4.35536e-05							6	0.00011759	1.78132e-05
				7	0.000293819	4.03663e-05							7	9.79886e-05	1.48438e-05
				8	0.000210968	3.29518e-05							8	8.31308e-05	1.25931e-05
				9	0.000206372	3.14754e-05							9	7.18428e-05	1.08831e-05
				10	0.000182564	2.8869e-05							10	6.3241e-05	9.58009e-06
				11	0.00017691	2.79749e-05							11	5.66612e-05	8.58334e-06
				12	0.00013365	2.40061e-05							12	5.16035e-05	7.81717e-06
				13	0.00010683	2.13673e-05							13	4.76919e-05	7.22463e-06
				14	0.0001743	2.72239e-05							14	4.46437e-05	6.76288e-06
				15	0.000130655	2.34682e-05							15	4.22463e-05	6.39969e-06
				16	0.000109959	2.15661e-05							16	4.03394e-05	6.11084e-06
				17	0.000113994	2.19396e-05							17	3.88029e-05	5.87807e-06
				18	0.000129896	2.33318e-05							18	3.75461e-05	5.68769e-06
				19	0.000122208	2.26952e-05							19	3.6501e-05	5.52937e-06
				20	0.000113732	2.18892e-05							20	3.56162e-05	5.39533e-06
				21	7.95567e-05	1.82524e-05							21	3.48532e-05	5.27975e-06
				22	0.000117979	2.22975e-05							22	3.4183e-05	5.17823e-06
				23	7.54833e-05	1.77924e-05							23	3.35837e-05	5.08744e-06
				24	0.000100566	2.05291e-05							24	3.3039e-05	5.00492e-06
				25	5.44034e-05	1.50893e-05							25	3.25363e-05	4.92877e-06
				26	8.36104e-05	1.86968e-05							26	3.20664e-05	4.85759e-06
				27	7.08721e-05	1.71897e-05							27	3.16223e-05	4.79031e-06
				28	8.38548e-05	1.87514e-05							28	3.11986e-05	4.72613e-06
				29	9.57301e-05	1.99623e-05							29	3.07914e-05	4.66444e-06
				30	0.000103547	2.07108e-05							30	3.03976e-05	4.60479e-06
				31	8.29578e-05	1.85509e-05							31	3.00149e-05	4.54682e-06
				32	8.2953e-05	1.85498e-05							32	2.96417e-05	4.49029e-06
				33	8.65586e-05	1.88896e-05							33	2.92766e-05	4.43498e-06
				34	7.01055e-05	1.70038e-05							34	2.89186e-05	4.38075e-06
				35	6.57966e-05	1.64498e-05							35	2.85669e-05	4.32747e-06
				36	0.000106775	2.09417e-05							36	2.8221e-05	4.27507e-06
				37	0.0001024	2.04812e-05							37	2.78804e-05	4.22347e-06
				38	6.99155e-05	1.69577e-05							38	2.75447e-05	4.17262e-06
				39	5.72569e-05	1.53031e-05							39	2.72137e-05	4.12248e-06
				nan	nan	nan							nan	nan	nan
				0	0.0017084	0.000185491							0	0.000640222	9.64479e-05
				1	0.00132559	0.000155272							1	0.000495536	7.46512e-05
				2	0.000993267	0.00012622							2	0.000386541	5.82314e-05
				3	0.000651315	9.82277e-05							3	0.000304394	4.58562e-05
				4	0.000582769	8.99546e-05							4	0.000242443	3.65235e-05
				5	0.000601969	8.87875e-05							5	0.000195685	2.94794e-05
				6	0.000369382	6.74545e-05							6	0.000160355	2.41572e-05
				7	0.000375336	6.53523e-05							7	0.000133625	2.01303e-05
				8	0.000331648	5.95775e-05							8	0.000113364	1.7078e-05
				9	0.000203056	4.54103e-05							9	9.79704e-05	1.4759e-05
				10	0.0002074	4.52641e-05							10	8.62404e-05	1.29919e-05
				11	8.89624e-05	2.96557e-05							11	7.72676e-05	1.16402e-05
				12	0.000157823	3.94594e-05							12	7.03705e-05	1.06011e-05
				13	0.000117464	3.39114e-05							13	6.50364e-05	9.79758e-06
				14	0.000127222	3.52877e-05							14	6.08797e-05	9.17138e-06
				15	0.0001868	4.28596e-05							15	5.76103e-05	8.67885e-06
				16	0.000176746	4.16638e-05							16	5.501e-05	8.28712e-06
				17	0.000108985	3.28624e-05							17	5.29147e-05	7.97147e-06
				18	8.83173e-05	2.94406e-05							18	5.12008e-05	7.71328e-06
				19	0.000128001	3.55037e-05							19	4.97756e-05	7.49857e-06
				20	8.84093e-05	2.94713e-05							20	4.8569e-05	7.3168e-06
				21	0.000138389	3.6989e-05							21	4.75285e-05	7.16006e-06
				22	0.000108764	3.27957e-05							22	4.66146e-05	7.02238e-06
				23	6.87344e-05	2.59802e-05							23	4.57974e-05	6.89926e-06
				24	9.81023e-05	3.10245e-05							24	4.50545e-05	6.78735e-06
				25	0.000117447	3.39064e-05							25	4.4369e-05	6.68408e-06
				26	0.000116407	3.3606e-05							26	4.37282e-05	6.58755e-06
				27	0.000116682	3.36856e-05							27	4.31226e-05	6.49631e-06
				28	0.000135952	3.63376e-05							28	4.25448e-05	6.40927e-06
				29	9.65992e-05	3.05491e-05							29	4.19895e-05	6.32561e-06
				30	0.00012572	3.48711e-05							30	4.14525e-05	6.24472e-06
				31	7.71413e-05	2.72748e-05							31	4.09307e-05	6.16611e-06
				32	0.000106244	3.20357e-05							32	4.04217e-05	6.08944e-06
				33	9.60012e-05	3.036e-05							33	3.99239e-05	6.01443e-06
				34	5.76312e-05	2.35286e-05							34	3.94356e-05	5.94088e-06
				35	3.83839e-05	1.91924e-05							35	3.89561e-05	5.86864e-06
				36	9.60779e-05	3.03842e-05							36	3.84844e-05	5.79758e-06
				37	0.000105727	3.188e-05							37	3.80199e-05	5.7276e-06
				38	4.78181e-05	2.13855e-05							38	3.75621e-05	5.65864e-06
				39	0.000115011	3.32032e-05							39	3.71107e-05	5.59064e-06
				nan	nan	nan							nan	nan	nan
				0	0.00156515	0.000174069							0	0.000615577	0.000112037
				1	0.00109571	0.000137054							1	0.00047646	8.6717e-05
				2	0.000898812	0.000118084							2	0.000371661	6.76433e-05
				3	0.000715992	0.0001013							3	0.000292676	5.32679e-05
				4	0.000445705	7.7608e-05							4	0.00023311	4.24267e-05
				5	0.000420182	7.31627e-05							5	0.000188152	3.42441e-05
				6	0.000451557	7.32721e-05							6	0.000154183	2.80617e-05
				7	0.000253506	5.28677e-05							7	0.000128481	2.33839e-05
				8	0.000282334	5.43444e-05							8	0.000109	1.98383e-05
				9	0.000222459	4.74348e-05							9	9.41991e-05	1.71445e-05
				10	0.000218686	4.66302e-05							10	8.29206e-05	1.50918e-05
				11	0.000219681	4.68423e-05							11	7.42932e-05	1.35216e-05
				12	0.000178543	4.20875e-05							12	6.76616e-05	1.23146e-05
				13	0.000137865	3.68489e-05							13	6.25329e-05	1.13811e-05
				14	6.91683e-05	2.61442e-05							14	5.85362e-05	1.06537e-05
				15	0.000108861	3.2825e-05							15	5.53926e-05	1.00816e-05
				16	0.000119308	3.44438e-05							16	5.28924e-05	9.62656e-06
				17	0.000237099	4.84045e-05							17	5.08777e-05	9.25989e-06
				18	0.000208524	4.55093e-05							18	4.92299e-05	8.95997e-06
				19	9.94048e-05	3.14364e-05							19	4.78595e-05	8.71056e-06
				20	0.000177563	4.18563e-05							20	4.66994e-05	8.49941e-06
				21	0.000128574	3.56627e-05							21	4.5699e-05	8.31733e-06
				22	0.000138905	3.71271e-05							22	4.48202e-05	8.1574e-06
				23	8.91555e-05	2.97201e-05							23	4.40344e-05	8.01439e-06
				24	0.000117294	3.38623e-05							24	4.33201e-05	7.88438e-06
				25	0.000127836	3.54579e-05							25	4.2661e-05	7.76442e-06
				26	8.86045e-05	2.95364e-05							26	4.20449e-05	7.65229e-06
				27	0.000185563	4.25758e-05							27	4.14626e-05	7.5463e-06
				28	0.000107678	3.24681e-05							28	4.09071e-05	7.4452e-06
				29	9.73231e-05	3.07781e-05							29	4.03731e-05	7.34802e-06
				30	7.75494e-05	2.74191e-05							30	3.98568e-05	7.25404e-06
				31	7.77025e-05	2.74733e-05							31	3.93551e-05	7.16273e-06
				32	6.76508e-05	2.55707e-05							32	3.88657e-05	7.07367e-06
				33	0.000106385	3.20782e-05							33	3.8387e-05	6.98654e-06
				34	8.68259e-05	2.89435e-05							34	3.79176e-05	6.9011e-06
				35	9.63587e-05	3.04731e-05							35	3.74565e-05	6.81718e-06
				36	0.000115273	3.32789e-05							36	3.70029e-05	6.73463e-06
				37	7.66565e-05	2.71034e-05							37	3.65563e-05	6.65335e-06
				38	4.81079e-05	2.15151e-05							38	3.61162e-05	6.57324e-06
				39	0.000134995	3.60818e-05							39	3.56822e-05	6.49425e-06
				nan	nan	nan							nan	nan	nan
				0	0.00248687	0.00020612							0	0.000610801	7.99731e-05
				1	0.00126038	0.000136013							1	0.000472764	6.18997e-05
				2	0.000810594	0.000101373							2	0.000368778	4.82846e-05
				3	0.000649123	8.38339e-05							3	0.000290406	3.80233e-05
				4	0.000613041	7.72641e-05							4	0.000231302	3.02847e-05
				5	0.000238347	4.58765e-05							5	0.000186692	2.44439e-05
				6	0.000265737	4.69835e-05							6	0.000152986	2.00308e-05
				7	0.000287174	4.72193e-05							7	0.000127484	1.66917e-05
				8	0.000187947	3.68635e-05							8	0.000108154	1.41608e-05
				9	0.000147585	3.14679e-05							9	9.34682e-05	1.22379e-05
				10	0.000145502	3.0342e-05							10	8.22773e-05	1.07727e-05
				11	7.93307e-05	2.20034e-05							11	7.37168e-05	9.65186e-06
				12	0.000155649	3.05281e-05							12	6.71367e-05	8.79031e-06
				13	0.000124952	2.72687e-05							13	6.20477e-05	8.124e-06
				14	0.000100782	2.44446e-05							14	5.8082e-05	7.60477e-06
				15	7.0824e-05	2.0446e-05							15	5.49628e-05	7.19637e-06
				16	8.85399e-05	2.28621e-05							16	5.2482e-05	6.87156e-06
				17	0.000100598	2.44001e-05							17	5.0483e-05	6.60982e-06
				18	7.67791e-05	2.12957e-05							18	4.88479e-05	6.39574e-06
				19	8.22669e-05	2.19878e-05							19	4.74882e-05	6.2177e-06
				20	4.70274e-05	1.66272e-05							20	4.63371e-05	6.06698e-06
				21	6.43748e-05	1.94105e-05							21	4.53444e-05	5.93701e-06
				22	6.45243e-05	1.94556e-05							22	4.44725e-05	5.82285e-06
				23	4.08737e-05	1.54492e-05							23	4.36928e-05	5.72077e-06
				24	7.01781e-05	2.02595e-05							24	4.2984e-05	5.62797e-06
				25	7.58866e-05	2.10481e-05							25	4.233e-05	5.54234e-06
				26	5.80588e-05	1.83604e-05							26	4.17187e-05	5.4623e-06
				27	5.2207e-05	1.74029e-05							27	4.11409e-05	5.38664e-06
				28	6.94797e-05	2.00579e-05							28	4.05897e-05	5.31447e-06
				29	9.29438e-05	2.32372e-05							29	4.00599e-05	5.2451e-06
				30	2.30909e-05	1.15456e-05							30	3.95476e-05	5.17803e-06
				31	3.46347e-05	1.41399e-05							31	3.90498e-05	5.11285e-06
				32	5.74008e-05	1.81523e-05							32	3.85642e-05	5.04927e-06
				33	6.30958e-05	1.90248e-05							33	3.80892e-05	4.98708e-06
				34	9.72975e-05	2.35995e-05							34	3.76234e-05	4.92609e-06
				35	3.98179e-05	1.50501e-05							35	3.71659e-05	4.86619e-06
				36	5.66386e-05	1.79113e-05							36	3.67158e-05	4.80726e-06
				37	5.06527e-05	1.68847e-05							37	3.62727e-05	4.74924e-06
				38	5.64406e-05	1.78487e-05							38	3.5836e-05	4.69206e-06
				39	5.64304e-05	1.78455e-05							39	3.54054e-05	4.63568e-06
				nan	nan	nan							nan	nan	nan
				0	0.00169899	0.00016519							0	0.00045599	7.99376e-05
				1	0.000927196	0.000112502							1	0.000352939	6.18722e-05
				2	0.000750069	9.38011e-05							2	0.000275309	4.82632e-05
				3	0.000588904	7.73544e-05							3	0.000216801	3.80064e-05
				4	0.000405256	6.11095e-05							4	0.000172677	3.02712e-05
				5	0.000390782	5.8268e-05							5	0.000139374	2.4433e-05
				6	0.000307738	4.9931e-05							6	0.000114211	2.00219e-05
				7	0.000270452	4.50828e-05							7	9.51727e-05	1.66843e-05
				8	0.00020288	3.76785e-05							8	8.07419e-05	1.41545e-05
				9	0.000181922	3.43837e-05							9	6.97782e-05	1.22325e-05
				10	0.000118074	2.709e-05							10	6.14237e-05	1.07679e-05
				11	0.000163332	3.14363e-05							11	5.50329e-05	9.64757e-06
				12	0.000136925	2.85531e-05							12	5.01205e-05	8.7864e-06
				13	0.000101204	2.45469e-05							13	4.63214e-05	8.12039e-06
				14	8.93057e-05	2.30599e-05							14	4.33608e-05	7.60139e-06
				15	0.000106498	2.51035e-05							15	4.10322e-05	7.19317e-06
				16	8.89718e-05	2.29737e-05							16	3.91802e-05	6.8685e-06
				17	0.000112178	2.57372e-05							17	3.76878e-05	6.60688e-06
				18	3.53413e-05	1.44283e-05							18	3.64672e-05	6.39289e-06
				19	0.000136095	2.83801e-05							19	3.54521e-05	6.21494e-06
				20	0.000124288	2.71239e-05							20	3.45927e-05	6.06429e-06
				21	7.07548e-05	2.0426e-05							21	3.38516e-05	5.93437e-06
				22	5.28671e-05	1.76229e-05							22	3.32007e-05	5.82026e-06
				23	9.39931e-05	2.34996e-05							23	3.26186e-05	5.71822e-06
				24	9.40014e-05	2.35017e-05							24	3.20895e-05	5.62547e-06
				25	8.76936e-05	2.26436e-05							25	3.16013e-05	5.53988e-06
				26	5.84094e-05	1.84713e-05							26	3.11449e-05	5.45987e-06
				27	0.000133657	2.78716e-05							27	3.07135e-05	5.38425e-06
				28	5.2412e-05	1.74712e-05							28	3.0302e-05	5.31211e-06
				29	4.62336e-05	1.63465e-05							29	2.99065e-05	5.24277e-06
				30	5.20146e-05	1.73387e-05							30	2.9524e-05	5.17572e-06
				31	6.9305e-05	2.00075e-05							31	2.91524e-05	5.11057e-06
				32	0.000109201	2.50542e-05							32	2.87899e-05	5.04703e-06
				33	4.00919e-05	1.51537e-05							33	2.84353e-05	4.98486e-06
				34	8.58969e-05	2.21796e-05							34	2.80876e-05	4.9239e-06
				35	5.69044e-05	1.79954e-05							35	2.7746e-05	4.86402e-06
				36	3.99557e-05	1.51022e-05							36	2.741e-05	4.80513e-06
				37	0.000102657	2.41981e-05							37	2.70792e-05	4.74713e-06
				38	3.96515e-05	1.49872e-05							38	2.67532e-05	4.68998e-06
				39	4.50139e-05	1.59152e-05							39	2.64317e-05	4.63362e-06
				nan	nan	nan							nan	nan	nan
				0	0.00182806	0.000166368							0	0.000225586	7.16092e-05
				1	0.00117731	0.000121515							1	0.000174605	5.54259e-05
				2	0.000939641	0.000100222							2	0.0001362	4.32348e-05
				3	0.000672933	7.82584e-05							3	0.000107255	3.40466e-05
				4	0.000410575	5.75061e-05							4	8.54263e-05	2.71174e-05
				5	0.000420102	5.56579e-05							5	6.89507e-05	2.18874e-05
				6	0.00033644	4.80726e-05							6	5.65022e-05	1.79358e-05
				7	0.000254409	4.02317e-05							7	4.70835e-05	1.4946e-05
				8	0.000206745	3.49506e-05							8	3.99444e-05	1.26798e-05
				9	0.000233875	3.56706e-05							9	3.45205e-05	1.0958e-05
				10	0.000152803	2.79005e-05							10	3.03873e-05	9.64604e-06
				11	0.000116741	2.38314e-05							11	2.72257e-05	8.64243e-06
				12	0.000160959	2.76069e-05							12	2.47955e-05	7.87098e-06
				13	0.000116775	2.33567e-05							13	2.2916e-05	7.27436e-06
				14	0.000139827	2.5531e-05							14	2.14513e-05	6.80943e-06
				15	0.000110944	2.26478e-05							15	2.02993e-05	6.44374e-06
				16	0.000115036	2.30088e-05							16	1.93831e-05	6.1529e-06
				17	5.93583e-05	1.64636e-05							17	1.86448e-05	5.91853e-06
				18	9.13439e-05	2.04262e-05							18	1.80409e-05	5.72684e-06
				19	0.000113652	2.27319e-05							19	1.75387e-05	5.56743e-06
				20	9.50832e-05	2.07501e-05							20	1.71136e-05	5.43247e-06
				21	0.000122362	2.35503e-05							21	1.6747e-05	5.31609e-06
				22	8.98772e-05	2.00982e-05							22	1.64249e-05	5.21387e-06
				23	5.36579e-05	1.54902e-05							23	1.6137e-05	5.12246e-06
				24	8.89039e-05	1.98806e-05							24	1.58752e-05	5.03937e-06
				25	7.55559e-05	1.83258e-05							25	1.56337e-05	4.9627e-06
				26	6.1942e-05	1.65553e-05							26	1.54079e-05	4.89103e-06
				27	8.36698e-05	1.91961e-05							27	1.51945e-05	4.82328e-06
				28	6.13353e-05	1.63931e-05							28	1.49909e-05	4.75866e-06
				29	6.99202e-05	1.74808e-05							29	1.47953e-05	4.69655e-06
				30	9.0878e-05	1.98323e-05							nan	nan	nan
				31	7.78056e-05	1.83398e-05							0	0.000737687	8.36164e-05
				32	8.59258e-05	1.92146e-05							1	0.000570974	6.47196e-05
				33	8.54409e-05	1.91061e-05							2	0.000445387	5.04843e-05
				34	8.09202e-05	1.85653e-05							3	0.000350734	3.97555e-05
				35	5.93905e-05	1.58733e-05							4	0.000279352	3.16644e-05
				36	0.000105148	2.10309e-05							5	0.000225475	2.55575e-05
				37	5.45217e-05	1.51221e-05							6	0.000184767	2.09433e-05
				38	7.96152e-05	1.82658e-05							7	0.000153967	1.74521e-05
				39	6.25907e-05	1.61615e-05							8	0.000130622	1.48059e-05
				nan	nan	nan							9	0.000112885	1.27955e-05
				0	0.00151251	0.000144344							10	9.93693e-05	1.12635e-05
				1	0.0010171	0.000108489							11	8.90306e-05	1.00916e-05
				2	0.000770382	8.72692e-05							12	8.10835e-05	9.19076e-06
				3	0.000608439	7.2235e-05							13	7.49373e-05	8.4941e-06
				4	0.000501391	6.22086e-05							14	7.01478e-05	7.95121e-06
				5	0.000299665	4.62476e-05							15	6.63807e-05	7.52421e-06
				6	0.000338443	4.74011e-05							16	6.33845e-05	7.1846e-06
				7	0.000221056	3.68476e-05							17	6.09702e-05	6.91094e-06
				8	0.000210379	3.45906e-05							18	5.89955e-05	6.6871e-06
				9	0.00025852	3.69372e-05							19	5.73532e-05	6.50096e-06
				10	0.000174978	2.95799e-05							20	5.5963e-05	6.34337e-06
				11	0.000158901	2.76637e-05							21	5.47641e-05	6.20748e-06
				12	0.000118712	2.3744e-05							22	5.3711e-05	6.08812e-06
				13	9.85178e-05	2.14996e-05							23	5.27694e-05	5.98138e-06
				14	0.000106739	2.22581e-05							24	5.19134e-05	5.88436e-06
				15	0.000101756	2.16959e-05							25	5.11236e-05	5.79483e-06
				16	0.000124548	2.3971e-05							26	5.03853e-05	5.71114e-06
				17	0.000128731	2.43298e-05							27	4.96874e-05	5.63204e-06
				18	0.000136981	2.50113e-05							28	4.90217e-05	5.55658e-06
				19	0.000132164	2.45443e-05							29	4.83818e-05	5.48405e-06
				20	7.701e-05	1.86785e-05							30	4.77631e-05	5.41392e-06
				21	8.12676e-05	1.91559e-05							31	4.71619e-05	5.34577e-06
				22	0.000117163	2.29791e-05							32	4.65754e-05	5.2793e-06
				23	8.07535e-05	1.90347e-05							33	4.60017e-05	5.21427e-06
				24	0.000116272	2.28043e-05							34	4.54392e-05	5.15051e-06
				25	5.78537e-05	1.60463e-05							35	4.48866e-05	5.08787e-06
				26	0.000119771	2.30515e-05							36	4.43431e-05	5.02626e-06
				27	7.06068e-05	1.76524e-05							37	4.38079e-05	4.9656e-06
				28	0.000123391	2.33204e-05							38	4.32805e-05	4.90581e-06
				29	7.45689e-05	1.80864e-05							39	4.27604e-05	4.84686e-06
				30	8.68077e-05	1.94118e-05							nan	nan	nan
				31	0.000103895	2.12088e-05							0	0.000887793	9.88115e-05
				32	0.000107735	2.15485e-05							1	0.000687157	7.64807e-05
				33	9.87797e-05	2.05982e-05							2	0.000536014	5.96585e-05
				34	6.38773e-05	1.64937e-05							3	0.000422102	4.698e-05
				35	5.51971e-05	1.53094e-05							4	0.000336195	3.74185e-05
				36	8.04333e-05	1.84536e-05							5	0.000271355	3.02019e-05
				37	8.41258e-05	1.88121e-05							6	0.000222364	2.47492e-05
				38	8.37393e-05	1.87256e-05							7	0.000185297	2.06236e-05
				39	9.60972e-05	2.00388e-05							8	0.000157201	1.74965e-05
				nan	nan	nan							9	0.000135855	1.51207e-05
				0	0.00122533	0.000143518							10	0.000119589	1.33103e-05
				1	0.000836554	0.000106295							11	0.000107147	1.19254e-05
				2	0.000584016	8.1807e-05							12	9.75825e-05	1.0861e-05
				3	0.000597148	7.58649e-05							13	9.01857e-05	1.00377e-05
				4	0.000399076	5.82252e-05							14	8.44216e-05	9.39614e-06
				5	0.00031406	4.90571e-05							15	7.98879e-05	8.89154e-06
				6	0.00027038	4.38685e-05							16	7.62821e-05	8.49022e-06
				7	0.000197474	3.6058e-05							17	7.33765e-05	8.16683e-06
				8	0.00026845	4.04768e-05							18	7.1e-05	7.90231e-06
				9	0.000151584	2.91751e-05							19	6.90236e-05	7.68234e-06
				10	0.000209504	3.31296e-05							20	6.73504e-05	7.49612e-06
				11	0.000109534	2.33543e-05							21	6.59076e-05	7.33553e-06
				12	9.23445e-05	2.11864e-05							22	6.46403e-05	7.19448e-06
				13	6.73348e-05	1.79967e-05							23	6.3507e-05	7.06835e-06
				14	7.63221e-05	1.90814e-05							24	6.24768e-05	6.95369e-06
				15	9.06698e-05	2.08022e-05							25	6.15263e-05	6.84789e-06
				16	6.17742e-05	1.71337e-05							26	6.06377e-05	6.74899e-06
				17	6.67152e-05	1.78311e-05							27	5.97979e-05	6.65552e-06
				18	7.66605e-05	1.9166e-05							28	5.89967e-05	6.56635e-06
				19	8.10178e-05	1.96507e-05							29	5.82266e-05	6.48064e-06
				20	5.22956e-05	1.57682e-05							30	5.7482e-05	6.39776e-06
				21	6.16657e-05	1.71036e-05							31	5.67584e-05	6.31723e-06
				22	5.22503e-05	1.57545e-05							32	5.60527e-05	6.23867e-06
				23	8.54483e-05	2.01414e-05							33	5.53622e-05	6.16183e-06
				24	8.4847e-05	1.99996e-05							34	5.46852e-05	6.08648e-06
				25	6.60864e-05	1.7663e-05							35	5.40202e-05	6.01246e-06
				26	7.09304e-05	1.83149e-05							36	5.33661e-05	5.93966e-06
				27	0.000121793	2.38873e-05							37	5.2722e-05	5.86797e-06
				28	7.96547e-05	1.932e-05							38	5.20872e-05	5.79732e-06
				29	9.7843e-05	2.13524e-05							39	5.14613e-05	5.72766e-06
				30	5.59249e-05	1.61447e-05							nan	nan	nan
				31	6.54102e-05	1.74823e-05							0	0.00127821	0.000121129
				32	9.27686e-05	2.07448e-05							1	0.000989345	9.37545e-05
				33	9.27427e-05	2.07391e-05							2	0.000771735	7.31329e-05
				34	4.62586e-05	1.46287e-05							3	0.000607727	5.75908e-05
				35	6.45501e-05	1.72524e-05							4	0.000484041	4.58698e-05
				36	6.91688e-05	1.78601e-05							5	0.000390687	3.70232e-05
				37	7.80355e-05	1.89273e-05							6	0.000320152	3.0339e-05
				38	5.96226e-05	1.65369e-05							7	0.000266784	2.52816e-05
				39	4.59455e-05	1.45297e-05							8	0.000226332	2.14482e-05
				nan	nan	nan							9	0.000195599	1.85358e-05
				0	0.00125162	0.000137487							10	0.00017218	1.63165e-05
				1	0.000757647	9.70512e-05							11	0.000154266	1.46189e-05
				2	0.000611172	8.02806e-05							12	0.000140496	1.3314e-05
				3	0.000571217	7.19915e-05							13	0.000129846	1.23048e-05
				4	0.00041932	5.81639e-05							14	0.000121547	1.15183e-05
				5	0.000445342	5.75088e-05							15	0.00011502	1.08998e-05
				6	0.000254623	4.18662e-05							16	0.000109828	1.04078e-05
				7	0.000236303	3.88535e-05							17	0.000105645	1.00114e-05
				8	0.000200132	3.43266e-05							18	0.000102223	9.68711e-06
				9	0.000179016	3.1166e-05							19	9.93777e-05	9.41745e-06
				10	0.000143497	2.71207e-05							20	9.69688e-05	9.18917e-06
				11	0.000107918	2.30098e-05							21	9.48915e-05	8.99232e-06
				12	0.000125672	2.46482e-05							22	9.30668e-05	8.8194e-06
				13	0.000100736	2.19838e-05							23	9.14352e-05	8.66479e-06
				14	0.00011507	2.34902e-05							24	8.9952e-05	8.52423e-06
				15	0.000105597	2.25149e-05							25	8.85834e-05	8.39454e-06
				16	8.60917e-05	2.02931e-05							26	8.73041e-05	8.27331e-06
				17	9.57295e-05	2.1407e-05							27	8.60949e-05	8.15872e-06
				18	0.00011467	2.34086e-05							28	8.49414e-05	8.04941e-06
				19	0.000119986	2.3999e-05							29	8.38327e-05	7.94434e-06
				20	4.78634e-05	1.51362e-05							30	8.27606e-05	7.84274e-06
				21	6.6653e-05	1.78145e-05							31	8.17188e-05	7.74402e-06
				22	7.61873e-05	1.90477e-05							32	8.07027e-05	7.64773e-06
				23	9.99409e-05	2.18102e-05							33	7.97086e-05	7.55353e-06
				24	0.00010428	2.2234e-05							34	7.87339e-05	7.46116e-06
				25	8.55131e-05	2.01567e-05							35	7.77764e-05	7.37042e-06
				26	5.67753e-05	1.63902e-05							36	7.68346e-05	7.28118e-06
				27	7.07212e-05	1.82609e-05							37	7.59073e-05	7.1933e-06
				28	5.18345e-05	1.56292e-05							38	7.49934e-05	7.10669e-06
				29	5.63288e-05	1.62613e-05							39	7.40922e-05	7.02129e-06
				30	6.09692e-05	1.69104e-05							nan	nan	nan
				31	7.95005e-05	1.92826e-05							0	0.00128788	9.58571e-05
				32	6.52235e-05	1.74324e-05							1	0.000996829	7.4194e-05
				33	9.76556e-05	2.13114e-05							2	0.000777573	5.78748e-05
				34	7.92037e-05	1.92106e-05							3	0.000612325	4.55753e-05
				35	6.91734e-05	1.78612e-05							4	0.000487703	3.62997e-05
				36	6.02321e-05	1.6706e-05							5	0.000393643	2.92988e-05
				37	4.59452e-05	1.45295e-05							6	0.000322574	2.40092e-05
				38	6.91855e-05	1.78644e-05							7	0.000268802	2.0007e-05
				39	0.000106147	2.21347e-05							8	0.000228045	1.69734e-05
				nan	nan	nan							9	0.000197079	1.46686e-05
				0	0.00096608	0.000161106							10	0.000173483	1.29123e-05
				1	0.000945524	0.000144272							11	0.000155433	1.15689e-05
				2	0.000553454	0.00010108							12	0.000141559	1.05362e-05
				3	0.000442282	8.36056e-05							13	0.000130828	9.73756e-06
				4	0.000479606	8.22752e-05							14	0.000122467	9.1152e-06
				5	0.000442511	7.591e-05							15	0.00011589	8.62569e-06
				6	0.000362834	6.62586e-05							16	0.000110659	8.23636e-06
				7	0.000223237	4.99239e-05							17	0.000106444	7.92264e-06
				8	0.000247886	5.0607e-05							18	0.000102997	7.66604e-06
				9	0.000181935	4.17434e-05							19	0.000100129	7.45264e-06
				10	0.000179916	4.02347e-05							20	9.77023e-05	7.27199e-06
				11	0.000165691	3.80159e-05							21	9.56093e-05	7.1162e-06
				12	0.000170783	3.81921e-05							22	9.37708e-05	6.97936e-06
				13	8.42493e-05	2.66433e-05							23	9.21269e-05	6.85701e-06
				14	0.000116385	3.11073e-05							24	9.06324e-05	6.74577e-06
				15	0.000166183	3.71635e-05							25	8.92535e-05	6.64314e-06
				16	0.000181416	3.86822e-05							26	8.79645e-05	6.5472e-06
				17	0.00012369	3.19389e-05							27	8.67462e-05	6.45652e-06
				18	8.29323e-05	2.62268e-05							28	8.55839e-05	6.37001e-06
				19	8.21145e-05	2.59682e-05							29	8.44669e-05	6.28687e-06
				20	0.000123976	3.20129e-05							30	8.33866e-05	6.20647e-06
				21	8.24263e-05	2.60668e-05							31	8.2337e-05	6.12834e-06
				22	0.000131001	3.27528e-05							32	8.13132e-05	6.05214e-06
				23	4.0868e-05	1.82772e-05							33	8.03116e-05	5.97759e-06
				24	0.000180193	3.84213e-05							34	7.93295e-05	5.9045e-06
				25	9.86169e-05	2.84699e-05							35	7.83648e-05	5.83269e-06
				26	7.4009e-05	2.46707e-05							36	7.74159e-05	5.76207e-06
				27	0.000114818	3.06884e-05							37	7.64815e-05	5.69252e-06
				28	6.53129e-05	2.30925e-05							38	7.55607e-05	5.62398e-06
				29	6.46861e-05	2.28709e-05							39	7.46527e-05	5.5564e-06
				30	8.91434e-05	2.68792e-05							nan	nan	nan
				31	8.16625e-05	2.58252e-05							0	0.00071982	8.27085e-05
				32	8.14845e-05	2.57689e-05							1	0.000557145	6.40169e-05
				33	8.13922e-05	2.57397e-05							2	0.000434599	4.99362e-05
				34	5.69105e-05	2.15109e-05							3	0.000342239	3.93238e-05
				35	8.11864e-05	2.56746e-05							4	0.000272586	3.13206e-05
				36	7.34776e-05	2.44936e-05							5	0.000220014	2.528e-05
				37	8.18513e-05	2.58849e-05							6	0.000180292	2.07159e-05
				38	0.000105723	2.93241e-05							7	0.000150238	1.72626e-05
				39	6.48094e-05	2.29145e-05							8	0.000127458	1.46451e-05
				nan	nan	nan							9	0.000110151	1.26565e-05
				0	0.000649772	0.000125098							10	9.69626e-05	1.11412e-05
				1	0.000829412	0.000129597							11	8.68743e-05	9.98199e-06
				2	0.000615502	0.000102622							12	7.91197e-05	9.09097e-06
				3	0.000430184	7.99038e-05							13	7.31224e-05	8.40188e-06
				4	0.000392832	7.29644e-05							14	6.84488e-05	7.86488e-06
				5	0.000428891	7.35732e-05							15	6.4773e-05	7.44252e-06
				6	0.000420493	7.00998e-05							16	6.18494e-05	7.10659e-06
				7	0.000270289	5.40665e-05							17	5.94935e-05	6.8359e-06
				8	0.000238517	4.86941e-05							18	5.75666e-05	6.6145e-06
				9	0.000269587	5.00691e-05							19	5.59642e-05	6.43037e-06
				10	0.000185841	4.05584e-05							20	5.46076e-05	6.2745e-06
				11	0.000233109	4.48681e-05							21	5.34378e-05	6.14008e-06
				12	0.000127941	3.30367e-05							22	5.24102e-05	6.02201e-06
				13	0.000125931	3.25177e-05							23	5.14914e-05	5.91644e-06
				14	0.000116542	3.11494e-05							24	5.06561e-05	5.82047e-06
				15	0.000125433	3.23892e-05							25	4.98854e-05	5.73191e-06
				16	0.000107633	2.98541e-05							26	4.91649e-05	5.64913e-06
				17	0.000124094	3.20432e-05							27	4.8484e-05	5.57089e-06
				18	0.000140633	3.41113e-05							28	4.78344e-05	5.49625e-06
				19	0.000123254	3.18265e-05							29	4.721e-05	5.42451e-06
				20	0.000115147	3.07765e-05							30	4.66063e-05	5.35513e-06
				21	8.24551e-05	2.60759e-05							31	4.60196e-05	5.28773e-06
				22	0.000123822	3.1973e-05							32	4.54474e-05	5.22198e-06
				23	9.11501e-05	2.74843e-05							33	4.48876e-05	5.15765e-06
				24	0.000131868	3.29697e-05							34	4.43387e-05	5.09458e-06
				25	9.00714e-05	2.7159e-05							35	4.37995e-05	5.03263e-06
				26	0.000122877	3.1729e-05							36	4.32691e-05	4.97169e-06
				27	9.07119e-05	2.73522e-05							37	4.27469e-05	4.91168e-06
				28	5.74402e-05	2.17111e-05							38	4.22322e-05	4.85255e-06
				29	7.35753e-05	2.45262e-05							39	4.17247e-05	4.79424e-06
				30	8.96896e-05	2.70439e-05							nan	nan	nan
				31	8.17764e-05	2.58612e-05							0	0.00074559	0.000139556
				32	0.000113798	3.04159e-05							1	0.000577091	0.000108017
				33	0.000105396	2.92335e-05							2	0.000450158	8.42584e-05
				34	3.26285e-05	1.63146e-05							3	0.000354491	6.6352e-05
				35	6.5009e-05	2.29851e-05							4	0.000282345	5.28479e-05
				36	8.16407e-05	2.58183e-05							5	0.000227891	4.26555e-05
				37	9.78872e-05	2.82593e-05							6	0.000186747	3.49544e-05
				38	8.96457e-05	2.70306e-05							7	0.000155617	2.91276e-05
				39	4.83596e-05	1.97433e-05							8	0.000132021	2.47111e-05
				nan	nan	nan							9	0.000114094	2.13556e-05
				0	0.000481195	0.000107629							10	0.000100434	1.87987e-05
				1	0.000175264	5.84274e-05							11	8.99844e-05	1.68428e-05
				2	0.00014248	4.74973e-05							12	8.19522e-05	1.53394e-05
				3	0.000160953	4.64675e-05							13	7.57402e-05	1.41767e-05
				4	0.000226748	5.20266e-05							14	7.08993e-05	1.32706e-05
				5	0.000142528	3.95336e-05							15	6.70918e-05	1.25579e-05
				6	0.000163963	4.09949e-05							16	6.40636e-05	1.19911e-05
				7	8.535e-05	2.84515e-05							17	6.16234e-05	1.15344e-05
				8	0.000130656	3.37378e-05							18	5.96275e-05	1.11608e-05
				9	4.04645e-05	1.80967e-05							19	5.79677e-05	1.08501e-05
				10	4.63329e-05	1.89158e-05							20	5.65625e-05	1.05871e-05
				11	6.04744e-05	2.13817e-05							21	5.53508e-05	1.03603e-05
				12	4.51595e-05	1.84368e-05							22	5.42865e-05	1.01611e-05
				13	5.26849e-05	1.99136e-05							23	5.33348e-05	9.98294e-06
				14	1.50597e-05	1.06489e-05							24	5.24696e-05	9.821e-06
				15	2.26347e-05	1.30683e-05							25	5.16713e-05	9.67158e-06
				16	4.53273e-05	1.85053e-05							26	5.09251e-05	9.53191e-06
				17	4.54825e-05	1.85687e-05							27	5.02197e-05	9.39988e-06
				18	3.8028e-05	1.7007e-05							28	4.95469e-05	9.27394e-06
				19	7.66987e-05	2.42554e-05							29	4.89002e-05	9.1529e-06
				20	5.35977e-05	2.02587e-05							30	4.82748e-05	9.03584e-06
				21	3.05441e-05	1.52723e-05							31	4.76671e-05	8.9221e-06
				22	4.5627e-05	1.86276e-05							32	4.70744e-05	8.81116e-06
				23	5.3498e-05	2.0221e-05							33	4.64946e-05	8.70263e-06
				24	2.29542e-05	1.32528e-05							34	4.5926e-05	8.59621e-06
				25	2.2817e-05	1.31736e-05							35	4.53675e-05	8.49167e-06
				26	7.61157e-06	7.61161e-06							36	4.48182e-05	8.38885e-06
				27	3.03604e-05	1.51805e-05							37	4.42772e-05	8.2876e-06
				28	2.28158e-05	1.31729e-05							38	4.37441e-05	8.18782e-06
				29	4.53712e-05	1.85232e-05							39	4.32185e-05	8.08943e-06
				30	3.02202e-05	1.51104e-05							nan	nan	nan
				31	2.26137e-05	1.30562e-05							0	0.0014338	0.000118799
				32	7.52063e-06	7.52066e-06							1	0.00110977	9.19512e-05
				33	1.50723e-05	1.06578e-05							2	0.000865671	7.17263e-05
				34	2.25376e-05	1.30123e-05							3	0.0006817	5.64831e-05
				35	1.66693e-20	7.50717e-06							4	0.000542959	4.49876e-05
				36	4.50505e-05	1.83923e-05							5	0.000438242	3.63111e-05
				37	1.50354e-05	1.06317e-05							6	0.000359121	2.97554e-05
				38	1.50527e-05	1.0644e-05							7	0.000299257	2.47953e-05
				39	2.23626e-05	1.29112e-05							8	0.000253882	2.10357e-05
				nan	nan	nan							9	0.000219408	1.81793e-05
				0	0.00032153	8.3035e-05							10	0.000193138	1.60027e-05
				1	8.80613e-05	3.93843e-05							11	0.000173043	1.43377e-05
				2	0.000263648	6.21524e-05							12	0.000157597	1.30579e-05
				3	0.000314519	6.29158e-05							13	0.000145651	1.20681e-05
				4	0.000137913	3.98153e-05							14	0.000136342	1.12968e-05
				5	0.000138898	3.85265e-05							15	0.00012902	1.06901e-05
				6	0.000137726	3.68119e-05							16	0.000123197	1.02076e-05
				7	0.000100611	3.03371e-05							17	0.000118504	9.81881e-06
				8	9.23169e-05	2.78361e-05							18	0.000114666	9.50079e-06
				9	6.32755e-05	2.23721e-05							19	0.000111474	9.23632e-06
				10	5.37009e-05	2.02977e-05							20	0.000108772	9.01243e-06
				11	5.28185e-05	1.99642e-05							21	0.000106442	8.81936e-06
				12	9.81108e-05	2.72126e-05							22	0.000104395	8.64977e-06
				13	6.07793e-05	2.14895e-05							23	0.000102565	8.49813e-06
				14	3.78004e-05	1.69052e-05							24	0.000100901	8.36028e-06
				15	5.31427e-05	2.00867e-05							25	9.93659e-05	8.23308e-06
				16	9.88898e-05	2.74287e-05							26	9.79308e-05	8.11418e-06
				17	5.35404e-05	2.0237e-05							27	9.65744e-05	8.00179e-06
				18	4.61542e-05	1.88429e-05							28	9.52805e-05	7.89458e-06
				19	1.53555e-05	1.08581e-05							29	9.40369e-05	7.79154e-06
				20	6.12595e-05	2.16593e-05							30	9.28342e-05	7.69189e-06
				21	6.12802e-05	2.16666e-05							31	9.16657e-05	7.59507e-06
				22	3.07096e-05	1.53551e-05							32	9.05259e-05	7.50063e-06
				23	1.53606e-05	1.08617e-05							33	8.94108e-05	7.40824e-06
				24	6.1371e-05	2.16987e-05							34	8.83174e-05	7.31765e-06
				25	5.33948e-05	2.0182e-05							35	8.72434e-05	7.22866e-06
				26	4.5857e-05	1.87216e-05							36	8.6187e-05	7.14113e-06
				27	3.0395e-05	1.51978e-05							37	8.51468e-05	7.05494e-06
				28	3.05861e-05	1.52933e-05							38	8.41216e-05	6.97e-06
				29	2.27934e-05	1.316e-05							39	8.31108e-05	6.88624e-06
				30	3.77289e-05	1.68733e-05							nan	nan	nan
				31	3.01875e-05	1.5094e-05							0	0.000677877	9.29785e-05
				32	1.50512e-05	1.06429e-05							1	0.000524681	7.19659e-05
				33	5.29393e-05	2.00098e-05							2	0.000409276	5.61368e-05
				34	3.76214e-05	1.68252e-05							3	0.000322297	4.42067e-05
				35	2.2611e-05	1.30547e-05							4	0.000256703	3.52097e-05
				36	1.50152e-05	1.06174e-05							5	0.000207194	2.8419e-05
				37	3.0136e-05	1.50683e-05							6	0.000169787	2.32882e-05
				38	1.50232e-05	1.06231e-05							7	0.000141484	1.94061e-05
				39	5.27002e-05	1.99194e-05							8	0.000120031	1.64636e-05
				nan	nan	nan							9	0.000103733	1.42281e-05
				0	0.00165471	0.0001994							10	9.13127e-05	1.25246e-05
				1	0.000931034	0.000135881							11	8.18122e-05	1.12215e-05
				2	0.000801118	0.000115687							12	7.45094e-05	1.02198e-05
				3	0.000296843	6.47879e-05							13	6.88616e-05	9.44514e-06
				4	0.000299421	6.113e-05							14	6.44604e-05	8.84147e-06
				5	0.000318308	6.0166e-05							15	6.09987e-05	8.36666e-06
				6	0.000284701	5.48001e-05							16	5.82455e-05	7.98902e-06
				7	0.000302847	5.44028e-05							17	5.60269e-05	7.68472e-06
				8	0.000207851	4.33452e-05							18	5.42123e-05	7.43582e-06
				9	0.000107999	2.99556e-05							19	5.27032e-05	7.22884e-06
				10	7.87864e-05	2.49156e-05							20	5.14256e-05	7.05361e-06
				11	0.00014495	3.32568e-05							21	5.0324e-05	6.9025e-06
				12	0.000121324	3.03331e-05							22	4.93563e-05	6.76977e-06
				13	7.55626e-05	2.38961e-05							23	4.8491e-05	6.65109e-06
				14	5.30786e-05	2.00625e-05							24	4.77044e-05	6.5432e-06
				15	7.53317e-05	2.3823e-05							25	4.69786e-05	6.44365e-06
				16	2.26958e-05	1.31036e-05							26	4.63001e-05	6.35059e-06
				17	9.09595e-05	2.62592e-05							27	4.56589e-05	6.26263e-06
				18	3.03948e-05	1.51977e-05							28	4.50471e-05	6.17872e-06
				19	8.34296e-05	2.51562e-05							29	4.44591e-05	6.09807e-06
				20	3.80019e-05	1.69954e-05							30	4.38906e-05	6.02009e-06
				21	5.29981e-05	2.0032e-05							31	4.33381e-05	5.94431e-06
				22	7.55192e-05	2.38823e-05							32	4.27992e-05	5.87039e-06
				23	9.13702e-05	2.63778e-05							33	4.2272e-05	5.79808e-06
				24	4.55084e-05	1.85792e-05							34	4.17551e-05	5.72718e-06
				25	7.5803e-05	2.39721e-05							35	4.12473e-05	5.65754e-06
				26	6.77949e-05	2.25992e-05							36	4.07479e-05	5.58903e-06
				27	5.26321e-05	1.98937e-05							37	4.0256e-05	5.52157e-06
				28	5.24626e-05	1.98296e-05							38	3.97714e-05	5.45509e-06
				29	3.0047e-05	1.50238e-05							39	3.92935e-05	5.38954e-06
				30	6.01741e-05	2.12755e-05							nan	nan	nan
				31	3.73183e-05	1.66896e-05							0	0.000927018	0.000112474
				32	5.99752e-05	2.12052e-05							1	0.000717518	8.70554e-05
				33	3.00623e-05	1.50314e-05							2	0.000559697	6.79072e-05
				34	4.48397e-05	1.83062e-05							3	0.000440752	5.34757e-05
				35	5.23474e-05	1.97861e-05							4	0.000351049	4.25922e-05
				36	5.20685e-05	1.96807e-05							5	0.000283344	3.43777e-05
				37	4.45349e-05	1.81818e-05							6	0.000232189	2.81711e-05
				38	5.2072e-05	1.9682e-05							7	0.000193484	2.34751e-05
				39	2.97843e-05	1.48924e-05							8	0.000164147	1.99157e-05
				nan	nan	nan							9	0.000141858	1.72114e-05
				0	0.00112983	0.000156787							10	0.000124873	1.51507e-05
				1	0.000770883	0.000119005							11	0.000111881	1.35743e-05
				2	0.000428021	8.09093e-05							12	0.000101894	1.23626e-05
				3	0.000368732	6.96994e-05							13	9.41704e-05	1.14256e-05
				4	0.000225382	5.17131e-05							14	8.81516e-05	1.06953e-05
				5	0.000252739	5.27077e-05							15	8.34176e-05	1.01209e-05
				6	0.000203862	4.55905e-05							16	7.96525e-05	9.66412e-06
				7	0.00018804	4.20518e-05							17	7.66186e-05	9.29601e-06
				8	0.000129751	3.35041e-05							18	7.4137e-05	8.99493e-06
				9	0.000145524	3.43034e-05							19	7.20733e-05	8.74454e-06
				10	0.000101364	2.81151e-05							20	7.03262e-05	8.53257e-06
				11	9.90105e-05	2.74622e-05							21	6.88196e-05	8.34978e-06
				12	9.09067e-05	2.62439e-05							22	6.74963e-05	8.18922e-06
				13	6.09742e-05	2.15584e-05							23	6.6313e-05	8.04565e-06
				14	0.000113694	2.93576e-05							24	6.52373e-05	7.91514e-06
				15	4.55886e-05	1.8612e-05							25	6.42447e-05	7.79472e-06
				16	6.82339e-05	2.27456e-05							26	6.33169e-05	7.68215e-06
				17	3.82361e-05	1.71001e-05							27	6.24399e-05	7.57574e-06
				18	6.84914e-05	2.28314e-05							28	6.16034e-05	7.47424e-06
				19	3.79449e-05	1.69699e-05							29	6.07993e-05	7.37669e-06
				20	6.10334e-05	2.15793e-05							30	6.00217e-05	7.28235e-06
				21	4.55723e-05	1.86053e-05							31	5.92662e-05	7.19068e-06
				22	6.10376e-05	2.15808e-05							32	5.85293e-05	7.10127e-06
				23	7.61195e-05	2.40722e-05							33	5.78083e-05	7.0138e-06
				24	8.34927e-05	2.51753e-05							34	5.71014e-05	6.92803e-06
				25	7.60071e-05	2.40366e-05							35	5.6407e-05	6.84378e-06
				26	3.02028e-05	1.51017e-05							36	5.5724e-05	6.76091e-06
				27	7.56087e-05	2.39107e-05							37	5.50514e-05	6.67931e-06
				28	3.77509e-05	1.68831e-05							38	5.43886e-05	6.59889e-06
				29	8.3261e-05	2.51054e-05							39	5.37351e-05	6.51959e-06
				30	5.98385e-05	2.11568e-05							nan	nan	nan
				31	6.76263e-05	2.2543e-05							0	0.00125044	0.000147098
				32	9.75049e-05	2.70446e-05							1	0.000967851	0.000113855
				33	8.20799e-05	2.47492e-05							2	0.000754969	8.88121e-05
				34	6.73945e-05	2.24657e-05							3	0.000594524	6.99379e-05
				35	3.73221e-05	1.66913e-05							4	0.000473525	5.5704e-05
				36	3.73101e-05	1.6686e-05							5	0.0003822	4.49607e-05
				37	7.45334e-05	2.35706e-05							6	0.000313197	3.68435e-05
				38	4.48674e-05	1.83175e-05							7	0.000260988	3.07018e-05
				39	5.97239e-05	2.11163e-05							8	0.000221415	2.60466e-05
				nan	nan	nan							9	0.00019135	2.25098e-05
				0	0.000969503	0.000109141							10	0.00016844	1.98147e-05
				1	0.000569756	7.54917e-05							11	0.000150915	1.77531e-05
				2	0.000383947	5.6623e-05							12	0.000137444	1.61684e-05
				3	0.000364028	5.09852e-05							13	0.000127025	1.49428e-05
				4	0.000246186	3.94272e-05							14	0.000118907	1.39878e-05
				5	0.000225923	3.61815e-05							15	0.000112521	1.32366e-05
				6	0.000226266	3.49183e-05							16	0.000107442	1.26392e-05
				7	0.000149748	2.73425e-05							17	0.00010335	1.21577e-05
				8	9.20701e-05	2.05886e-05							18	0.000100002	1.1764e-05
				9	0.000115027	2.21384e-05							19	9.72187e-05	1.14365e-05
				10	0.000100316	2.00643e-05							20	9.48621e-05	1.11593e-05
				11	9.27318e-05	1.89299e-05							21	9.283e-05	1.09202e-05
				12	0.000102359	1.97003e-05							22	9.10449e-05	1.07102e-05
				13	5.63477e-05	1.45494e-05							23	8.94488e-05	1.05225e-05
				14	5.98345e-05	1.49592e-05							24	8.79978e-05	1.03518e-05
				15	6.31742e-05	1.53226e-05							25	8.66589e-05	1.01943e-05
				16	5.52802e-05	1.42738e-05							26	8.54074e-05	1.0047e-05
				17	6.2723e-05	1.52131e-05							27	8.42245e-05	9.90789e-06
				18	8.12663e-05	1.73269e-05							28	8.3096e-05	9.77514e-06
				19	6.61505e-05	1.55925e-05							29	8.20114e-05	9.64755e-06
				20	4.40477e-05	1.27158e-05							30	8.09626e-05	9.52417e-06
				21	5.85388e-05	1.46352e-05							31	7.99434e-05	9.40428e-06
				22	5.46934e-05	1.41222e-05							32	7.89494e-05	9.28735e-06
				23	5.08255e-05	1.35841e-05							33	7.79769e-05	9.17295e-06
				24	4.7021e-05	1.30417e-05							34	7.70234e-05	9.06078e-06
				25	5.44049e-05	1.40477e-05							35	7.60867e-05	8.95059e-06
				26	2.89218e-05	1.02256e-05							36	7.51654e-05	8.84221e-06
				27	3.61746e-05	1.14397e-05							37	7.42582e-05	8.73549e-06
				28	3.24003e-05	1.08003e-05							38	7.33641e-05	8.63032e-06
				29	3.22811e-05	1.07606e-05							39	7.24825e-05	8.52661e-06
				30	2.84119e-05	1.00453e-05							nan	nan	nan
				31	4.97023e-05	1.32839e-05							0	0.000622401	9.22927e-05
				32	2.84083e-05	1.0044e-05							1	0.000481742	7.14351e-05
				33	4.58998e-05	1.27307e-05							2	0.000375781	5.57227e-05
				34	5.62417e-05	1.40609e-05							3	0.000295921	4.38806e-05
				35	4.21358e-05	1.21639e-05							4	0.000235695	3.495e-05
				36	3.14464e-05	1.04823e-05							5	0.000190238	2.82094e-05
				37	4.19414e-05	1.21078e-05							6	0.000155892	2.31164e-05
				38	4.18673e-05	1.20863e-05							7	0.000129905	1.9263e-05
				39	3.12425e-05	1.04143e-05							8	0.000110208	1.63422e-05
				nan	nan	nan							9	9.52434e-05	1.41232e-05
				0	0.000716636	8.89265e-05							10	8.38399e-05	1.24322e-05
				1	0.000530726	6.97101e-05							11	7.51169e-05	1.11387e-05
				2	0.000378132	5.40313e-05							12	6.84117e-05	1.01444e-05
				3	0.000309237	4.5603e-05							13	6.32261e-05	9.37548e-06
				4	0.00025993	3.96452e-05							14	5.91851e-05	8.77626e-06
				5	0.000268872	3.88146e-05							15	5.60067e-05	8.30495e-06
				6	0.000150739	2.79941e-05							16	5.34788e-05	7.9301e-06
				7	0.000139533	2.59128e-05							17	5.14418e-05	7.62804e-06
				8	0.000141129	2.49505e-05							18	4.97756e-05	7.38098e-06
				9	0.000111891	2.15349e-05							19	4.83901e-05	7.17552e-06
				10	7.89512e-05	1.76549e-05							20	4.72171e-05	7.00158e-06
				11	5.35116e-05	1.4302e-05							21	4.62056e-05	6.85159e-06
				12	4.15027e-05	1.25139e-05							22	4.53171e-05	6.71984e-06
				13	5.62107e-05	1.4514e-05							23	4.45226e-05	6.60203e-06
				14	7.84687e-05	1.71241e-05							24	4.38004e-05	6.49494e-06
				15	8.15892e-05	1.73957e-05							25	4.3134e-05	6.39612e-06
				16	5.19697e-05	1.38899e-05							26	4.2511e-05	6.30375e-06
				17	7.04498e-05	1.6163e-05							27	4.19222e-05	6.21644e-06
				18	9.9778e-05	1.92034e-05							28	4.13606e-05	6.13315e-06
				19	6.27573e-05	1.52215e-05							29	4.08207e-05	6.0531e-06
				20	6.99317e-05	1.60441e-05							30	4.02987e-05	5.97568e-06
				21	4.75903e-05	1.31996e-05							31	3.97914e-05	5.90046e-06
				22	3.29365e-05	1.09791e-05							32	3.92966e-05	5.82709e-06
				23	6.55016e-05	1.54395e-05							33	3.88126e-05	5.75532e-06
				24	5.44626e-05	1.40626e-05							34	3.8338e-05	5.68494e-06
				25	3.98473e-05	1.20147e-05							35	3.78717e-05	5.61581e-06
				26	7.62565e-05	1.66413e-05							36	3.74131e-05	5.54781e-06
				27	5.79679e-05	1.44925e-05							37	3.69616e-05	5.48085e-06
				28	6.50241e-05	1.53269e-05							38	3.65166e-05	5.41486e-06
				29	5.03329e-05	1.34524e-05							39	3.60778e-05	5.34979e-06
				30	5.71613e-05	1.42908e-05							nan	nan	nan
				31	4.62565e-05	1.28296e-05							0	0.000905635	9.09327e-05
				32	2.84389e-05	1.00549e-05							1	0.000700967	7.03825e-05
				33	4.95373e-05	1.32398e-05							2	0.000546787	5.49016e-05
				34	6.71994e-05	1.54172e-05							3	0.000430585	4.3234e-05
				35	5.29175e-05	1.36637e-05							4	0.000342951	3.44349e-05
				36	4.9108e-05	1.3125e-05							5	0.000276808	2.77937e-05
				37	5.61119e-05	1.40285e-05							6	0.000226833	2.27758e-05
				38	4.53675e-05	1.2583e-05							7	0.000189021	1.89792e-05
				39	3.8316e-05	1.1553e-05							8	0.00016036	1.61014e-05
				nan	nan	nan							9	0.000138585	1.3915e-05
				0	0.000942295	0.000116054							10	0.000121993	1.2249e-05
				1	0.000562026	8.11487e-05							11	0.0001093	1.09746e-05
				2	0.000450518	6.64432e-05							12	9.95436e-05	9.99494e-06
				3	0.000354778	5.47551e-05							13	9.19982e-05	9.23733e-06
				4	0.000314337	4.85123e-05							14	8.61182e-05	8.64693e-06
				5	0.000214007	3.84417e-05							15	8.14934e-05	8.18257e-06
				6	0.000135014	2.94648e-05							16	7.78152e-05	7.81324e-06
				7	0.000136698	2.85058e-05							17	7.48512e-05	7.51564e-06
				8	0.000109781	2.45494e-05							18	7.24269e-05	7.27221e-06
				9	0.000117199	2.44395e-05							19	7.04107e-05	7.06978e-06
				10	0.000111897	2.33337e-05							20	6.8704e-05	6.89841e-06
				11	8.93183e-05	2.04921e-05							21	6.72322e-05	6.75063e-06
				12	6.00964e-05	1.66683e-05							22	6.59393e-05	6.62082e-06
				13	9.15095e-05	2.04633e-05							23	6.47833e-05	6.50475e-06
				14	6.38779e-05	1.70727e-05							24	6.37324e-05	6.39923e-06
				15	4.51766e-05	1.42865e-05							25	6.27628e-05	6.30187e-06
				16	4.97161e-05	1.49904e-05							26	6.18564e-05	6.21086e-06
				17	4.95954e-05	1.4954e-05							27	6.09996e-05	6.12483e-06
				18	9.87465e-05	2.10541e-05							28	6.01824e-05	6.04277e-06
				19	7.7026e-05	1.86824e-05							29	5.93968e-05	5.9639e-06
				20	5.86021e-05	1.62539e-05							30	5.86372e-05	5.88763e-06
				21	7.65436e-05	1.85654e-05							31	5.78991e-05	5.81352e-06
				22	7.18716e-05	1.79687e-05							32	5.71792e-05	5.74123e-06
				23	4.94721e-05	1.49169e-05							33	5.64748e-05	5.67051e-06
				24	3.15566e-05	1.19275e-05							34	5.57842e-05	5.60117e-06
				25	7.19095e-05	1.79782e-05							35	5.51059e-05	5.53306e-06
				26	6.73305e-05	1.73854e-05							36	5.44386e-05	5.46606e-06
				27	5.36112e-05	1.54767e-05							37	5.37816e-05	5.40008e-06
				28	5.358e-05	1.54677e-05							38	5.3134e-05	5.33507e-06
				29	5.3637e-05	1.54842e-05							39	5.24955e-05	5.27096e-06
				30	4.00334e-05	1.33448e-05							nan	nan	nan
				31	3.55671e-05	1.25751e-05							0	0.00100412	0.000103804
				32	2.66399e-05	1.08759e-05							1	0.000777197	8.03449e-05
				33	2.22006e-05	9.92856e-06							2	0.00060625	6.26728e-05
				34	3.53665e-05	1.25042e-05							3	0.000477411	4.93537e-05
				35	5.71763e-05	1.58584e-05							4	0.000380247	3.93091e-05
				36	3.51978e-05	1.24446e-05							5	0.000306911	3.17278e-05
				37	4.84398e-05	1.46056e-05							6	0.000251501	2.59996e-05
				38	2.63735e-05	1.07671e-05							7	0.000209577	2.16656e-05
				39	3.52931e-05	1.24783e-05							8	0.000177799	1.83805e-05
				nan	nan	nan							9	0.000153657	1.58847e-05
				0	0.00061952	8.94536e-05							10	0.000135259	1.39828e-05
				1	0.000610581	8.09034e-05							11	0.000121186	1.2528e-05
				2	0.000363983	5.75635e-05							12	0.000110369	1.14097e-05
				3	0.000262056	4.56253e-05							13	0.000102003	1.05448e-05
				4	0.000224132	4.02607e-05							14	9.54836e-05	9.87088e-06
				5	0.000214212	3.78726e-05							15	9.03558e-05	9.34079e-06
				6	0.000186035	3.39689e-05							16	8.62776e-05	8.91918e-06
				7	0.000119248	2.60238e-05							17	8.29913e-05	8.57945e-06
				8	0.000153513	2.85093e-05							18	8.03033e-05	8.30158e-06
				9	0.000129273	2.53545e-05							19	7.80679e-05	8.07049e-06
				10	7.65245e-05	1.9132e-05							20	7.61755e-05	7.87486e-06
				11	0.000107395	2.23948e-05							21	7.45437e-05	7.70616e-06
				12	9.66403e-05	2.10899e-05							22	7.31102e-05	7.55798e-06
				13	0.000110007	2.24566e-05							23	7.18285e-05	7.42547e-06
				14	6.82551e-05	1.76241e-05							24	7.06634e-05	7.30502e-06
				15	9.47551e-05	2.06784e-05							25	6.95882e-05	7.19388e-06
				16	5.85266e-05	1.62329e-05							26	6.85833e-05	7.08999e-06
				17	4.51452e-05	1.42765e-05							27	6.76334e-05	6.99179e-06
				18	2.2619e-05	1.01157e-05							28	6.67272e-05	6.89811e-06
				19	7.67354e-05	1.86119e-05							29	6.58562e-05	6.80807e-06
				20	0.000140132	2.51705e-05							30	6.5014e-05	6.721e-06
				21	6.33093e-05	1.69208e-05							31	6.41956e-05	6.6364e-06
				22	5.86946e-05	1.62795e-05							32	6.33974e-05	6.55388e-06
				23	7.66413e-05	1.85891e-05							33	6.26165e-05	6.47315e-06
				24	7.21001e-05	1.80258e-05							34	6.18508e-05	6.394e-06
				25	0.000121562	2.33964e-05							35	6.10986e-05	6.31624e-06
				26	4.49399e-05	1.42116e-05							36	6.03588e-05	6.23976e-06
				27	7.18355e-05	1.79597e-05							37	5.96303e-05	6.16445e-06
				28	5.81686e-05	1.61336e-05							38	5.89124e-05	6.09023e-06
				29	4.46002e-05	1.41042e-05							39	5.82044e-05	6.01705e-06
				30	7.58149e-05	1.83887e-05							nan	nan	nan
				31	8.91713e-05	1.99404e-05							0	0.000960893	9.86153e-05
				32	7.56427e-05	1.83469e-05							1	0.000743737	7.63289e-05
				33	7.96332e-05	1.87706e-05							2	0.00058015	5.95401e-05
				34	6.64361e-05	1.71544e-05							3	0.000456857	4.68867e-05
				35	5.73886e-05	1.59173e-05							4	0.000363877	3.73442e-05
				36	4.43217e-05	1.40161e-05							5	0.000293698	3.01419e-05
				37	6.17487e-05	1.65036e-05							6	0.000240674	2.47e-05
				38	3.51367e-05	1.2423e-05							7	0.000200554	2.05826e-05
				39	5.29326e-05	1.52808e-05							8	0.000170145	1.74618e-05
				nan	nan	nan							9	0.000147041	1.50907e-05
				0	0.00163713	0.000169928							10	0.000129436	1.32839e-05
				1	0.00100095	0.000120572							11	0.000115969	1.19018e-05
				2	0.00074112	9.49327e-05							12	0.000105617	1.08394e-05
				3	0.000692115	8.45903e-05							13	9.76115e-05	1.00178e-05
				4	0.000534033	7.01444e-05							14	9.13728e-05	9.37748e-06
				5	0.00037744	5.62782e-05							15	8.64659e-05	8.87389e-06
				6	0.00036591	5.33851e-05							16	8.25631e-05	8.47336e-06
				7	0.000266041	4.37438e-05							17	7.94183e-05	8.15061e-06
				8	0.000233934	3.95475e-05							18	7.68461e-05	7.88662e-06
				9	0.000149339	3.04864e-05							19	7.47069e-05	7.66708e-06
				10	0.000141252	2.88354e-05							20	7.2896e-05	7.48123e-06
				11	0.000170632	3.11561e-05							21	7.13344e-05	7.32097e-06
				12	0.000139841	2.79706e-05							22	6.99627e-05	7.18019e-06
				13	0.000121859	2.59824e-05							23	6.87362e-05	7.05431e-06
				14	0.000126225	2.63217e-05							24	6.76212e-05	6.93988e-06
				15	0.000113778	2.48301e-05							25	6.65923e-05	6.83429e-06
				16	0.000134771	2.69564e-05							26	6.56306e-05	6.73559e-06
				17	0.000107108	2.39517e-05							27	6.47216e-05	6.6423e-06
				18	0.000111492	2.43311e-05							28	6.38545e-05	6.55331e-06
				19	0.000142929	2.7509e-05							29	6.3021e-05	6.46777e-06
				20	9.50352e-05	2.24013e-05							30	6.2215e-05	6.38505e-06
				21	6.32527e-05	1.82602e-05							31	6.14319e-05	6.30468e-06
				22	8.40885e-05	2.10232e-05							32	6.0668e-05	6.22629e-06
				23	6.80562e-05	1.88762e-05							33	5.99207e-05	6.14959e-06
				24	7.81209e-05	2.01717e-05							34	5.9188e-05	6.07439e-06
				25	8.86222e-05	2.14952e-05							35	5.84682e-05	6.00053e-06
				26	7.27283e-05	1.94383e-05							36	5.77602e-05	5.92787e-06
				27	5.70768e-05	1.72099e-05							37	5.70631e-05	5.85632e-06
				28	9.86729e-05	2.26385e-05							38	5.63761e-05	5.78581e-06
				29	0.000108415	2.36596e-05							39	5.56986e-05	5.71628e-06
				30	6.15206e-05	1.77601e-05							nan	nan	nan
				31	5.13218e-05	1.62299e-05							0	0.00119049	9.67548e-05
				32	6.68056e-05	1.85293e-05							1	0.000921444	7.48888e-05
				33	0.000112948	2.40822e-05							2	0.000718769	5.84168e-05
				34	5.652e-05	1.7042e-05							3	0.000566018	4.60022e-05
				35	7.16235e-05	1.9143e-05							4	0.00045082	3.66397e-05
				36	6.15288e-05	1.77625e-05							5	0.000363874	2.95732e-05
				37	7.18956e-05	1.92157e-05							6	0.000298179	2.4234e-05
				38	4.59017e-05	1.5301e-05							7	0.000248474	2.01943e-05
				39	4.60316e-05	1.53443e-05							8	0.000210799	1.71323e-05
				nan	nan	nan							9	0.000182175	1.4806e-05
				0	0.00118143	0.000137437							10	0.000160363	1.30333e-05
				1	0.000866598	0.000107545							11	0.000143678	1.16772e-05
				2	0.000586045	8.12987e-05							12	0.000130853	1.06349e-05
				3	0.00057429	7.47922e-05							13	0.000120935	9.82876e-06
				4	0.000468389	6.43563e-05							14	0.000113205	9.20056e-06
				5	0.000413074	5.78564e-05							15	0.000107126	8.70647e-06
				6	0.000195449	3.83352e-05							16	0.000102291	8.3135e-06
				7	0.000256715	4.22102e-05							17	9.83943e-05	7.99684e-06
				8	0.000244637	3.96912e-05							18	9.52074e-05	7.73783e-06
				9	0.000157439	3.08793e-05							19	9.25572e-05	7.52243e-06
				10	0.00015582	2.99904e-05							20	9.03136e-05	7.34009e-06
				11	0.000147284	2.88872e-05							21	8.83789e-05	7.18285e-06
				12	0.000178659	3.15862e-05							22	8.66794e-05	7.04473e-06
				13	0.000121702	2.59489e-05							23	8.51598e-05	6.92122e-06
				14	8.77436e-05	2.1937e-05							24	8.37784e-05	6.80895e-06
				15	0.000120083	2.56036e-05							25	8.25037e-05	6.70535e-06
				16	0.000107611	2.40641e-05							26	8.13122e-05	6.60852e-06
				17	0.00015027	2.8401e-05							27	8.0186e-05	6.51699e-06
				18	6.94032e-05	1.92498e-05							28	7.91117e-05	6.42967e-06
				19	6.89787e-05	1.9132e-05							29	7.8079e-05	6.34575e-06
				20	9.53295e-05	2.24707e-05							30	7.70805e-05	6.26459e-06
				21	5.8255e-05	1.75652e-05							31	7.61102e-05	6.18573e-06
				22	9.47885e-05	2.23431e-05							32	7.51638e-05	6.10882e-06
				23	6.8317e-05	1.89485e-05							33	7.4238e-05	6.03357e-06
				24	9.41958e-05	2.22034e-05							34	7.33302e-05	5.95979e-06
				25	9.4003e-05	2.2158e-05							35	7.24385e-05	5.88732e-06
				26	8.39878e-05	2.0998e-05							36	7.15613e-05	5.81603e-06
				27	6.24571e-05	1.80305e-05							37	7.06976e-05	5.74583e-06
				28	6.74847e-05	1.87177e-05							38	6.98464e-05	5.67665e-06
				29	7.24557e-05	1.93654e-05							39	6.90071e-05	5.60844e-06
				30	9.82924e-05	2.25512e-05							nan	nan	nan
				31	7.21029e-05	1.92711e-05							0	0.000502846	0.000103783
				32	6.6813e-05	1.85313e-05							1	0.000389206	8.03285e-05
				33	2.57237e-05	1.15042e-05							2	0.000303599	6.266e-05
				34	0.000102789	2.29857e-05							3	0.000239079	4.93436e-05
				35	0.00013867	2.66892e-05							4	0.000190421	3.93011e-05
				36	0.000102593	2.29418e-05							5	0.000153696	3.17214e-05
				37	4.10829e-05	1.45253e-05							6	0.000125947	2.59943e-05
				38	7.22562e-05	1.93121e-05							7	0.000104952	2.16612e-05
				39	8.75947e-05	2.12459e-05							8	8.90386e-05	1.83768e-05
				nan	nan	nan							9	7.69484e-05	1.58814e-05
				0	0.000830828	0.00010007							10	6.77353e-05	1.398e-05
				1	0.000754684	8.77697e-05							11	6.06879e-05	1.25254e-05
				2	0.000462785	6.3586e-05							12	5.52707e-05	1.14074e-05
				3	0.000444447	5.83742e-05							13	5.10812e-05	1.05427e-05
				4	0.000270088	4.32558e-05							14	4.78164e-05	9.86887e-06
				5	0.000281941	4.25114e-05							15	4.52485e-05	9.33889e-06
				6	0.000236841	3.74531e-05							16	4.32062e-05	8.91737e-06
				7	0.000120941	2.57865e-05							17	4.15605e-05	8.57771e-06
				8	0.000157728	2.83314e-05							18	4.02144e-05	8.29988e-06
				9	0.000133219	2.5178e-05							19	3.9095e-05	8.06884e-06
				10	0.000150973	2.62835e-05							20	3.81473e-05	7.87326e-06
				11	0.000134616	2.45794e-05							21	3.73301e-05	7.70459e-06
				12	9.33017e-05	2.03612e-05							22	3.66123e-05	7.55644e-06
				13	0.000119789	2.3055e-05							23	3.59704e-05	7.42396e-06
				14	7.97147e-05	1.87898e-05							24	3.53869e-05	7.30353e-06
				15	7.06138e-05	1.76542e-05							25	3.48485e-05	7.19241e-06
				16	6.62735e-05	1.71124e-05							26	3.43452e-05	7.08854e-06
				17	8.82575e-05	1.9736e-05							27	3.38695e-05	6.99036e-06
				18	0.000105406	2.15172e-05							28	3.34157e-05	6.8967e-06
				19	5.28413e-05	1.52544e-05							29	3.29796e-05	6.80669e-06
				20	7.0441e-05	1.7611e-05							30	3.25578e-05	6.71964e-06
				21	0.000105099	2.14546e-05							31	3.2148e-05	6.63505e-06
				22	6.5334e-05	1.68698e-05							32	3.17482e-05	6.55255e-06
				23	6.95911e-05	1.73985e-05							33	3.13572e-05	6.47184e-06
				24	6.07848e-05	1.6246e-05							34	3.09737e-05	6.3927e-06
				25	5.17477e-05	1.49387e-05							35	3.05971e-05	6.31496e-06
				26	5.61056e-05	1.55614e-05							36	3.02266e-05	6.23849e-06
				27	9.01859e-05	1.96812e-05							37	2.98617e-05	6.16319e-06
				28	5.1364e-05	1.4828e-05							38	2.95022e-05	6.08899e-06
				29	6.38683e-05	1.64913e-05							39	2.91477e-05	6.01582e-06
				30	5.52569e-05	1.5326e-05							nan	nan	nan
				31	7.63566e-05	1.79982e-05							0	0.00104723	9.91001e-05
				32	6.73683e-05	1.68428e-05							1	0.000810566	7.67041e-05
				33	5.45095e-05	1.51187e-05							2	0.000632279	5.98328e-05
				34	4.60779e-05	1.38934e-05							3	0.000497908	4.71172e-05
				35	3.76457e-05	1.25488e-05							4	0.000396573	3.75278e-05
				36	5.43258e-05	1.50678e-05							5	0.000320089	3.02901e-05
				37	5.81081e-05	1.55306e-05							6	0.000262299	2.48215e-05
				38	4.5716e-05	1.37843e-05							7	0.000218575	2.06838e-05
				39	4.56076e-05	1.37516e-05							8	0.000185433	1.75476e-05
				nan	nan	nan							9	0.000160254	1.51649e-05
				0	0.000763205	9.19215e-05							10	0.000141067	1.33492e-05
				1	0.000613974	7.61824e-05							11	0.000126389	1.19603e-05
				2	0.000469634	6.16835e-05							12	0.000115108	1.08927e-05
				3	0.000451634	5.73731e-05							13	0.000106382	1.0067e-05
				4	0.00026	4.16399e-05							14	9.95831e-05	9.42358e-06
				5	0.00025893	3.996e-05							15	9.42353e-05	8.91751e-06
				6	0.000171796	3.13687e-05							16	8.99819e-05	8.51501e-06
				7	0.000195153	3.20868e-05							17	8.65545e-05	8.19067e-06
				8	0.000177298	2.95529e-05							18	8.37511e-05	7.92539e-06
				9	0.000159108	2.72895e-05							19	8.14197e-05	7.70477e-06
				10	0.000122567	2.35897e-05							20	7.94461e-05	7.51801e-06
				11	0.000129194	2.39927e-05							21	7.77442e-05	7.35696e-06
				12	0.000116056	2.27619e-05							22	7.62492e-05	7.21549e-06
				13	0.000138035	2.47939e-05							23	7.49125e-05	7.08899e-06
				14	8.85308e-05	1.97971e-05							24	7.36973e-05	6.97399e-06
				15	5.76604e-05	1.59927e-05							25	7.2576e-05	6.86789e-06
				16	9.29441e-05	2.02832e-05							26	7.15279e-05	6.7687e-06
				17	7.95178e-05	1.87434e-05							27	7.05372e-05	6.67495e-06
				18	8.38693e-05	1.92419e-05							28	6.95921e-05	6.58552e-06
				19	7.94235e-05	1.87212e-05							29	6.86838e-05	6.49956e-06
				20	8.77768e-05	1.96285e-05							30	6.78054e-05	6.41644e-06
				21	0.00011824	2.27569e-05							31	6.69519e-05	6.33567e-06
				22	5.67974e-05	1.57533e-05							32	6.61193e-05	6.25689e-06
				23	7.43142e-05	1.80246e-05							33	6.53049e-05	6.17982e-06
				24	8.69736e-05	1.94489e-05							34	6.45063e-05	6.10425e-06
				25	7.37073e-05	1.78774e-05							35	6.37219e-05	6.03002e-06
				26	8.187e-05	1.87832e-05							36	6.29503e-05	5.957e-06
				27	6.45971e-05	1.66795e-05							37	6.21905e-05	5.88511e-06
				28	3.86904e-05	1.28971e-05							38	6.14418e-05	5.81425e-06
				29	3.8464e-05	1.28216e-05							39	6.07034e-05	5.74438e-06
				30	5.96759e-05	1.59496e-05							nan	nan	nan
				31	5.92071e-05	1.58243e-05							0	0.000916093	0.000104262
				32	6.74726e-05	1.68688e-05							1	0.000709062	8.06996e-05
				33	6.73276e-05	1.68326e-05							2	0.000553101	6.29495e-05
				34	8.38742e-05	1.87558e-05							3	0.000435557	4.95716e-05
				35	5.46023e-05	1.51445e-05							4	0.000346912	3.94827e-05
				36	4.17387e-05	1.31993e-05							5	0.000280005	3.18679e-05
				37	6.26471e-05	1.6176e-05							6	0.000229453	2.61144e-05
				38	4.98377e-05	1.43873e-05							7	0.000191204	2.17613e-05
				39	3.31703e-05	1.17277e-05							8	0.000162212	1.84617e-05
				nan	nan	nan							9	0.000140186	1.59548e-05
				0	0.00146607	0.000118243							10	0.000123401	1.40445e-05
				1	0.000937477	8.59866e-05							11	0.000110562	1.25833e-05
				2	0.000633786	6.47101e-05							12	0.000100693	1.14601e-05
				3	0.000503013	5.33353e-05							13	9.30606e-05	1.05914e-05
				4	0.000345148	4.15596e-05							14	8.71127e-05	9.91446e-06
				5	0.000326495	3.87554e-05							15	8.24346e-05	9.38203e-06
				6	0.000268817	3.38733e-05							16	7.87138e-05	8.95856e-06
				7	0.000192935	2.75653e-05							17	7.57156e-05	8.61733e-06
				8	0.000156545	2.38751e-05							18	7.32633e-05	8.33823e-06
				9	0.000125397	2.06166e-05							19	7.12239e-05	8.10612e-06
				10	0.000124251	1.98976e-05							20	6.94974e-05	7.90963e-06
				11	8.25418e-05	1.5886e-05							21	6.80086e-05	7.74018e-06
				12	0.000102048	1.75022e-05							22	6.67008e-05	7.59134e-06
				13	0.000109269	1.7965e-05							23	6.55315e-05	7.45826e-06
				14	0.000110884	1.7989e-05							24	6.44685e-05	7.33727e-06
				15	0.000101646	1.71824e-05							25	6.34876e-05	7.22564e-06
				16	6.33959e-05	1.35166e-05							26	6.25707e-05	7.12129e-06
				17	6.30607e-05	1.34451e-05							27	6.17041e-05	7.02266e-06
				18	9.42324e-05	1.64047e-05							28	6.08774e-05	6.92856e-06
				19	6.24107e-05	1.33065e-05							29	6.00828e-05	6.83813e-06
				20	4.81816e-05	1.16861e-05							30	5.93144e-05	6.75068e-06
				21	7.32314e-05	1.43625e-05							31	5.85677e-05	6.6657e-06
				22	0.000109272	1.74987e-05							32	5.78395e-05	6.58282e-06
				23	6.96668e-05	1.3934e-05							33	5.7127e-05	6.50173e-06
				24	8.60016e-05	1.54472e-05							34	5.64285e-05	6.42223e-06
				25	9.10691e-05	1.5854e-05							35	5.57423e-05	6.34413e-06
				26	7.71019e-05	1.45716e-05							36	5.50673e-05	6.26731e-06
				27	7.40069e-05	1.42433e-05							37	5.44026e-05	6.19166e-06
				28	6.536e-05	1.33421e-05							38	5.37477e-05	6.11712e-06
				29	4.88744e-05	1.15201e-05							39	5.31018e-05	6.04361e-06
				30	7.04117e-05	1.38095e-05							nan	nan	nan
				31	7.29668e-05	1.40431e-05							0	0.000767334	9.84575e-05
				32	7.54494e-05	1.42592e-05							1	0.000593921	7.62068e-05
				33	6.43427e-05	1.31344e-05							2	0.000463286	5.94448e-05
				34	4.8377e-05	1.14029e-05							3	0.00036483	4.68117e-05
				35	5.61111e-05	1.22449e-05							4	0.000290579	3.72845e-05
				36	5.35399e-05	1.19723e-05							5	0.000234537	3.00937e-05
				37	3.99563e-05	1.03169e-05							6	0.000192193	2.46605e-05
				38	4.50812e-05	1.09341e-05							7	0.000160155	2.05497e-05
				39	5.82684e-05	1.24233e-05							8	0.000135871	1.74338e-05
				nan	nan	nan							9	0.000117422	1.50665e-05
				0	0.00127619	0.00010534							10	0.000103363	1.32626e-05
				1	0.000683847	7.05626e-05							11	9.26086e-05	1.18827e-05
				2	0.000601428	6.07755e-05							12	8.43421e-05	1.0822e-05
				3	0.000400322	4.62364e-05							13	7.7949e-05	1.00017e-05
				4	0.000373238	4.22704e-05							14	7.2967e-05	9.36248e-06
				5	0.000373356	4.07457e-05							15	6.90485e-05	8.85969e-06
				6	0.000287282	3.43427e-05							16	6.59319e-05	8.4598e-06
				7	0.000220844	2.90021e-05							17	6.34206e-05	8.13757e-06
				8	0.000203709	2.67516e-05							18	6.13664e-05	7.874e-06
				9	0.000210093	2.62649e-05							19	5.96582e-05	7.65482e-06
				10	0.00011892	1.92928e-05							20	5.82121e-05	7.46926e-06
				11	0.000109432	1.82399e-05							21	5.6965e-05	7.30926e-06
				12	0.000101616	1.7428e-05							22	5.58696e-05	7.1687e-06
				13	9.4069e-05	1.66301e-05							23	5.48902e-05	7.04303e-06
				14	0.000128118	1.9316e-05							24	5.39998e-05	6.92878e-06
				15	0.000104127	1.73556e-05							25	5.31782e-05	6.82336e-06
				16	0.000109322	1.77355e-05							26	5.24102e-05	6.72482e-06
				17	5.44686e-05	1.24964e-05							27	5.16843e-05	6.63167e-06
				18	6.2858e-05	1.34019e-05							28	5.09918e-05	6.54282e-06
				19	6.80779e-05	1.38969e-05							29	5.03262e-05	6.45742e-06
				20	0.000107401	1.74238e-05							30	4.96826e-05	6.37484e-06
				21	7.3142e-05	1.4345e-05							31	4.90572e-05	6.29459e-06
				22	0.000101071	1.68462e-05							32	4.84472e-05	6.21632e-06
				23	9.49105e-05	1.62779e-05							33	4.78505e-05	6.13976e-06
				24	8.87083e-05	1.56824e-05							34	4.72654e-05	6.06468e-06
				25	7.48445e-05	1.44045e-05							35	4.66906e-05	5.99093e-06
				26	7.99978e-05	1.48559e-05							36	4.61252e-05	5.91838e-06
				27	5.21851e-05	1.19725e-05							37	4.55685e-05	5.84695e-06
				28	8.20514e-05	1.49812e-05							38	4.50199e-05	5.77655e-06
				29	8.99163e-05	1.56533e-05							39	4.44789e-05	5.70714e-06
				30	0.000100589	1.65378e-05							nan	nan	nan
				31	6.76346e-05	1.35275e-05							0	0.000921277	0.000132142
				32	7.55878e-05	1.42854e-05							1	0.000713074	0.000102279
				33	6.45394e-05	1.31746e-05							2	0.000556231	7.97823e-05
				34	7.24715e-05	1.39478e-05							3	0.000438022	6.28271e-05
				35	5.63005e-05	1.22862e-05							4	0.000348875	5.00404e-05
				36	9.10576e-05	1.56171e-05							5	0.00028159	4.03894e-05
				37	8.26805e-05	1.48506e-05							6	0.000230751	3.30975e-05
				38	7.20943e-05	1.38752e-05							7	0.000192286	2.75803e-05
				39	5.83406e-05	1.24387e-05							8	0.00016313	2.33983e-05
				nan	nan	nan							9	0.000140979	2.02211e-05
				0	0.00325068	0.000451658							10	0.0001241	1.78001e-05
				1	0.00231977	0.000346289							11	0.000111188	1.59481e-05
				2	0.000873156	0.000195345							12	0.000101263	1.45245e-05
				3	0.000741078	0.000165783							13	9.35872e-05	1.34236e-05
				4	0.0010202	0.000180457							14	8.76057e-05	1.25656e-05
				5	0.00039155	0.000104671							15	8.2901e-05	1.18908e-05
				6	0.000402574	0.000100668							16	7.91592e-05	1.13541e-05
				7	0.000398315	9.66285e-05							17	7.61441e-05	1.09216e-05
				8	0.000372223	9.02975e-05							18	7.36779e-05	1.05679e-05
				9	0.000225154	6.78956e-05							19	7.16269e-05	1.02737e-05
				10	0.000221676	6.40009e-05							20	6.98907e-05	1.00247e-05
				11	0.000223464	6.1986e-05							21	6.83934e-05	9.80992e-06
				12	0.000226553	6.0557e-05							22	6.70783e-05	9.62128e-06
				13	0.000229819	5.93473e-05							23	6.59023e-05	9.45261e-06
				14	0.000193279	5.36121e-05							24	6.48333e-05	9.29927e-06
				15	0.000161021	4.85542e-05							25	6.38469e-05	9.15779e-06
				16	0.000101251	3.82717e-05							26	6.29248e-05	9.02553e-06
				17	0.00017305	4.99603e-05							27	6.20533e-05	8.90052e-06
				18	9.96129e-05	3.76524e-05							28	6.12219e-05	8.78127e-06
				19	0.00011282	3.98905e-05							29	6.04228e-05	8.66666e-06
				20	0.000126049	4.20193e-05							30	5.965e-05	8.55582e-06
				21	0.000166802	4.81564e-05							31	5.88992e-05	8.44812e-06
				22	9.66931e-05	3.65487e-05							32	5.81668e-05	8.34307e-06
				23	0.0001527	4.6045e-05							33	5.74503e-05	8.24031e-06
				24	6.8145e-05	3.04766e-05							34	5.67478e-05	8.13954e-06
				25	8.16615e-05	3.33398e-05							35	5.60577e-05	8.04056e-06
				26	6.76082e-05	3.02365e-05							36	5.53789e-05	7.9432e-06
				27	0.000134793	4.26288e-05							37	5.47105e-05	7.84732e-06
				28	6.69602e-05	2.99467e-05							38	5.40518e-05	7.75285e-06
				29	0.000105928	3.74536e-05							39	5.34023e-05	7.65968e-06
				30	0.000119712	3.99067e-05							nan	nan	nan
				31	0.000105321	3.72389e-05							0	0.00056049	0.000124993
				32	6.53835e-05	2.92415e-05							1	0.000433822	9.67457e-05
				33	0.000103769	3.669e-05							2	0.000338402	7.54662e-05
				34	7.78285e-05	3.17748e-05							3	0.000266485	5.94282e-05
				35	0.000103389	3.65557e-05							4	0.00021225	4.73333e-05
				36	5.14925e-05	2.57471e-05							5	0.000171314	3.82044e-05
				37	6.40652e-05	2.86519e-05							6	0.000140385	3.13069e-05
				38	0.000140179	4.22692e-05							7	0.000116983	2.60882e-05
				39	6.36781e-05	2.84788e-05							8	9.92455e-05	2.21325e-05
				40	8.81447e-05	3.33173e-05							9	8.57693e-05	1.91272e-05
				41	0.000114456	3.81545e-05							10	7.55002e-05	1.68371e-05
				42	7.53929e-05	3.07804e-05							11	6.76448e-05	1.50853e-05
				43	6.27517e-05	2.80644e-05							12	6.16067e-05	1.37388e-05
				44	7.50888e-05	3.06562e-05							13	5.69369e-05	1.26974e-05
				45	6.24114e-05	2.79122e-05							14	5.32978e-05	1.18858e-05
				46	9.86891e-05	3.48939e-05							15	5.04356e-05	1.12475e-05
				47	7.42497e-05	3.03137e-05							16	4.81591e-05	1.07399e-05
				48	8.63413e-05	3.26356e-05							17	4.63248e-05	1.03308e-05
				49	2.45607e-05	1.73673e-05							18	4.48244e-05	9.99617e-06
				nan	nan	nan							19	4.35766e-05	9.71792e-06
				0	0.00333757	0.000439125							20	4.25203e-05	9.48235e-06
				1	0.0015597	0.000271765							21	4.16094e-05	9.27922e-06
				2	0.000958811	0.00019583							22	4.08093e-05	9.10078e-06
				3	0.00057234	0.000138861							23	4.00939e-05	8.94124e-06
				4	0.000476287	0.000119106							24	3.94435e-05	8.79619e-06
				5	0.000527744	0.000118045							25	3.88434e-05	8.66236e-06
				6	0.000489145	0.000109408							26	3.82824e-05	8.53726e-06
				7	0.000386853	9.38474e-05							27	3.77522e-05	8.41902e-06
				8	0.000297688	7.95746e-05							28	3.72463e-05	8.30622e-06
				9	0.000333283	8.08493e-05							29	3.67602e-05	8.1978e-06
				10	0.000358765	8.02395e-05							30	3.62901e-05	8.09296e-06
				11	0.000216482	6.00492e-05							31	3.58333e-05	7.99109e-06
				12	0.000219767	5.87428e-05							32	3.53877e-05	7.89173e-06
				13	0.00010542	3.98474e-05							33	3.49518e-05	7.79452e-06
				14	7.39686e-05	3.30812e-05							34	3.45244e-05	7.6992e-06
				15	0.0001892	5.24807e-05							35	3.41046e-05	7.60558e-06
				16	0.000144207	4.56062e-05							36	3.36916e-05	7.51348e-06
				17	0.000157629	4.75314e-05							37	3.32849e-05	7.4228e-06
				18	7.10604e-05	3.17805e-05							38	3.28842e-05	7.33343e-06
				19	0.000113469	4.01201e-05							39	3.2489e-05	7.2453e-06
				20	0.000110972	3.92371e-05							40	3.20992e-05	7.15836e-06
				21	0.000166331	4.80204e-05							41	3.17144e-05	7.07256e-06
				22	0.000152498	4.5984e-05							42	3.13346e-05	6.98786e-06
				23	0.000179089	4.96756e-05							43	3.09596e-05	6.90423e-06
				24	9.60404e-05	3.6302e-05							44	3.05892e-05	6.82163e-06
				25	6.80267e-05	3.04237e-05							45	3.02234e-05	6.74006e-06
				26	0.000108884	3.84989e-05							46	2.98621e-05	6.65948e-06
				27	0.000134636	4.25791e-05							47	2.95052e-05	6.57989e-06
				28	0.000120884	4.02976e-05							48	2.91526e-05	6.50125e-06
				29	0.000186415	4.98272e-05							49	2.88043e-05	6.42357e-06
				30	0.000106233	3.75614e-05							nan	nan	nan
				31	0.000131522	4.15941e-05							0	0.000990712	7.75024e-05
				32	3.92751e-05	2.2676e-05							1	0.000766817	5.99873e-05
				33	2.60754e-05	1.84384e-05							2	0.000598153	4.67929e-05
				34	6.50705e-05	2.91015e-05							3	0.000471035	3.68486e-05
				35	7.78877e-05	3.1799e-05							4	0.000375169	2.93491e-05
				36	0.000129517	4.09599e-05							5	0.000302812	2.36887e-05
				37	8.9585e-05	3.38618e-05							6	0.000248142	1.94119e-05
				38	7.67793e-05	3.13465e-05							7	0.000206778	1.6176e-05
				39	0.000101713	3.59632e-05							8	0.000175425	1.37233e-05
				40	6.316e-05	2.82471e-05							9	0.000151604	1.18599e-05
				41	0.000163562	4.53685e-05							10	0.000133453	1.04399e-05
				42	6.32055e-05	2.82674e-05							11	0.000119568	9.35367e-06
				43	0.000101869	3.60182e-05							12	0.000108895	8.51874e-06
				44	0.000150808	4.35384e-05							13	0.000100641	7.87301e-06
				45	0.000136579	4.11835e-05							14	9.42083e-05	7.36982e-06
				46	0.000123858	3.91702e-05							15	8.91491e-05	6.97404e-06
				47	0.000124098	3.92461e-05							16	8.51252e-05	6.65926e-06
				48	0.000135329	4.08066e-05							17	8.18828e-05	6.40561e-06
				49	8.63451e-05	3.26371e-05							18	7.92308e-05	6.19814e-06
				nan	nan	nan							19	7.70252e-05	6.02561e-06
				0	0.00216964	0.000367209							20	7.51581e-05	5.87955e-06
				1	0.00116778	0.000238539							21	7.35481e-05	5.75359e-06
				2	0.000391156	0.000123723							22	7.21338e-05	5.64295e-06
				3	0.000458339	0.00012253							23	7.08692e-05	5.54403e-06
				4	0.000328275	9.47835e-05							24	6.97196e-05	5.45409e-06
				5	0.000313327	8.69176e-05							25	6.86588e-05	5.37111e-06
				6	0.000288638	8.00675e-05							26	6.76673e-05	5.29354e-06
				7	0.000184796	6.16054e-05							27	6.673e-05	5.22022e-06
				8	0.000117862	4.81205e-05							28	6.5836e-05	5.15028e-06
				9	0.000254325	6.79816e-05							29	6.49767e-05	5.08306e-06
				10	0.000116682	4.41046e-05							30	6.41457e-05	5.01805e-06
				11	0.000122904	4.34563e-05							31	6.33382e-05	4.95489e-06
				12	0.000101581	3.83962e-05							32	6.25507e-05	4.89328e-06
				13	5.52196e-05	2.76107e-05							33	6.17802e-05	4.833e-06
				14	8.14894e-05	3.32695e-05							34	6.10247e-05	4.7739e-06
				15	0.000106714	3.77316e-05							35	6.02826e-05	4.71585e-06
				16	9.26514e-05	3.50209e-05							36	5.95527e-05	4.65874e-06
				17	6.54932e-05	2.92906e-05							37	5.88339e-05	4.60252e-06
				18	6.53279e-05	2.92167e-05							38	5.81255e-05	4.5471e-06
				19	2.59938e-05	1.83807e-05							39	5.74271e-05	4.49246e-06
				20	3.89193e-05	2.24706e-05							40	5.6738e-05	4.43855e-06
				21	2.58599e-05	1.8286e-05							41	5.60579e-05	4.38535e-06
				22	6.45228e-05	2.88566e-05							42	5.53865e-05	4.33283e-06
				23	5.12752e-05	2.56384e-05							43	5.47236e-05	4.28097e-06
				24	0.000102331	3.61817e-05							44	5.4069e-05	4.22976e-06
				25	5.10779e-05	2.55397e-05							45	5.34224e-05	4.17918e-06
				26	2.57204e-05	1.81874e-05							46	5.27838e-05	4.12922e-06
				27	2.55041e-05	1.80344e-05							47	5.21529e-05	4.07987e-06
				28	6.33237e-05	2.83203e-05							48	5.15296e-05	4.03111e-06
				29	0.000113827	3.79448e-05							49	5.09139e-05	3.98294e-06
				30	2.54281e-05	1.79807e-05							nan	nan	nan
				31	1.26455e-05	1.26456e-05							0	0.00110818	9.07158e-05
				32	8.87217e-05	3.35354e-05							1	0.000857735	7.02146e-05
				33	3.78698e-05	2.18647e-05							2	0.000669073	5.47707e-05
				34	3.80053e-05	2.19429e-05							3	0.000526883	4.31309e-05
				35	3.78569e-05	2.18572e-05							4	0.000419651	3.43528e-05
				36	7.5183e-05	3.06947e-05							5	0.000338715	2.77274e-05
				37	7.55192e-05	3.0832e-05							6	0.000277563	2.27215e-05
				38	3.74459e-05	2.16199e-05							7	0.000231295	1.89339e-05
				39	2.50469e-05	1.77111e-05							8	0.000196224	1.6063e-05
				nan	nan	nan							9	0.000169579	1.38818e-05
				0	0.00171412	0.000308184							10	0.000149276	1.22198e-05
				1	0.000956423	0.000204028							11	0.000133744	1.09484e-05
				2	0.000758344	0.00016556							12	0.000121806	9.9711e-06
				3	0.000449235	0.000116023							13	0.000112573	9.21529e-06
				4	0.000520434	0.000116409							14	0.000105378	8.62631e-06
				5	0.000300342	8.33149e-05							15	9.97191e-05	8.16305e-06
				6	0.000233163	7.03112e-05							16	9.52182e-05	7.7946e-06
				7	0.000161483	5.70985e-05							17	9.15913e-05	7.49771e-06
				8	0.000169546	5.6521e-05							18	8.86248e-05	7.25487e-06
				9	0.000139831	4.94419e-05							19	8.61578e-05	7.05292e-06
				10	9.59662e-05	3.91803e-05							20	8.40693e-05	6.88195e-06
				11	0.000104097	3.93475e-05							21	8.22683e-05	6.73453e-06
				12	4.26405e-05	2.46191e-05							22	8.06864e-05	6.60502e-06
				13	6.82274e-05	3.05135e-05							23	7.92718e-05	6.48923e-06
				14	8.06567e-05	3.29295e-05							24	7.79859e-05	6.38396e-06
				15	0.000146518	4.41807e-05							25	7.67994e-05	6.28684e-06
				16	2.65293e-05	1.87593e-05							26	7.56903e-05	6.19604e-06
				17	9.21903e-05	3.48466e-05							27	7.46419e-05	6.11022e-06
				18	0.000104586	3.69789e-05							28	7.36419e-05	6.02836e-06
				19	3.94696e-05	2.27883e-05							29	7.26807e-05	5.94967e-06
				20	6.53172e-05	2.92119e-05							30	7.17512e-05	5.87358e-06
				21	5.23133e-05	2.61575e-05							31	7.0848e-05	5.79965e-06
				22	0.000141951	4.28035e-05							32	6.9967e-05	5.72753e-06
				23	5.16533e-05	2.58275e-05							33	6.91052e-05	5.65698e-06
				24	6.42486e-05	2.87339e-05							34	6.82601e-05	5.58781e-06
				25	5.12295e-05	2.56155e-05							35	6.74301e-05	5.51986e-06
				26	7.66487e-05	3.12931e-05							36	6.66136e-05	5.45302e-06
				27	6.42411e-05	2.87306e-05							37	6.58096e-05	5.3872e-06
				28	5.11888e-05	2.55952e-05							38	6.50172e-05	5.32234e-06
				29	5.1141e-05	2.55713e-05							39	6.42359e-05	5.25838e-06
				30	7.60844e-05	3.10627e-05							40	6.34651e-05	5.19529e-06
				31	8.90659e-05	3.36655e-05							41	6.27044e-05	5.13301e-06
				32	0.000113815	3.79408e-05							42	6.19535e-05	5.07154e-06
				33	2.54471e-05	1.79941e-05							43	6.1212e-05	5.01084e-06
				34	8.84083e-05	3.3417e-05							44	6.04797e-05	4.9509e-06
				35	7.54627e-05	3.08089e-05							45	5.97565e-05	4.89169e-06
				36	3.76953e-05	2.17639e-05							46	5.90421e-05	4.83321e-06
				37	7.55645e-05	3.08505e-05							47	5.83364e-05	4.77545e-06
				38	8.80898e-05	3.32966e-05							48	5.76393e-05	4.71838e-06
				39	8.7568e-05	3.30993e-05							49	5.69506e-05	4.662e-06
				nan	nan	nan							nan	nan	nan
				0	0.00483139	0.000451825							0	0.0010024	9.93379e-05
				1	0.00242205	0.000292							1	0.000775866	7.68882e-05
				2	0.00124657	0.000190241							2	0.000605211	5.99764e-05
				3	0.0011819	0.000170712							3	0.000476593	4.72303e-05
				4	0.000653256	0.000117374							4	0.000379596	3.76179e-05
				5	0.000650294	0.000109962							5	0.000306386	3.03628e-05
				6	0.000404191	8.25251e-05							6	0.00025107	2.4881e-05
				7	0.000252147	6.30462e-05							7	0.000209218	2.07335e-05
				8	0.000233951	5.8496e-05							8	0.000177495	1.75897e-05
				9	0.0001624	4.68855e-05							9	0.000153393	1.52013e-05
				10	0.000187703	4.84702e-05							10	0.000135028	1.33812e-05
				11	0.000197282	4.78535e-05							11	0.000120979	1.1989e-05
				12	0.000164644	4.2515e-05							12	0.00011018	1.09188e-05
				13	0.000159174	4.11024e-05							13	0.000101828	1.00912e-05
				14	0.000156981	4.0536e-05							14	9.532e-05	9.4462e-06
				15	0.000166643	4.16648e-05							15	9.02011e-05	8.93891e-06
				16	9.34092e-05	3.11382e-05							16	8.61298e-05	8.53545e-06
				17	0.000113708	3.42867e-05							17	8.28491e-05	8.21033e-06
				18	8.24827e-05	2.91635e-05							18	8.01657e-05	7.94441e-06
				19	0.000124405	3.59152e-05							19	7.79342e-05	7.72327e-06
				20	9.22834e-05	3.07628e-05							20	7.60451e-05	7.53605e-06
				21	7.16597e-05	2.7086e-05							21	7.4416e-05	7.37461e-06
				22	0.000132608	3.67818e-05							22	7.2985e-05	7.2328e-06
				23	6.12462e-05	2.50046e-05							23	7.17055e-05	7.106e-06
				24	9.16726e-05	3.05592e-05							24	7.05423e-05	6.99073e-06
				25	9.13131e-05	3.04394e-05							25	6.9469e-05	6.88437e-06
				26	8.14984e-05	2.88154e-05							26	6.84658e-05	6.78495e-06
				27	8.04245e-05	2.84357e-05							27	6.75175e-05	6.69097e-06
				28	0.000100744	3.18598e-05							28	6.66129e-05	6.60133e-06
				29	9.06226e-05	3.02092e-05							29	6.57434e-05	6.51516e-06
				30	0.000119404	3.44713e-05							30	6.49026e-05	6.43184e-06
				31	7.99505e-05	2.82681e-05							31	6.40857e-05	6.35088e-06
				32	4.96451e-05	2.22026e-05							32	6.32888e-05	6.27191e-06
				33	9.91966e-05	3.13706e-05							33	6.25092e-05	6.19466e-06
				34	0.000118346	3.41659e-05							34	6.17448e-05	6.1189e-06
				35	6.86366e-05	2.59433e-05							35	6.0994e-05	6.04449e-06
				36	9.77624e-05	3.0917e-05							36	6.02554e-05	5.9713e-06
				37	9.82742e-05	3.10788e-05							37	5.95282e-05	5.89923e-06
				38	9.79148e-05	3.09652e-05							38	5.88115e-05	5.82821e-06
				39	0.000127069	3.52452e-05							39	5.81047e-05	5.75817e-06
				40	0.000116739	3.3702e-05							40	5.74075e-05	5.68907e-06
				41	8.74536e-05	2.91527e-05							41	5.67194e-05	5.62088e-06
				42	7.7664e-05	2.74597e-05							42	5.60401e-05	5.55357e-06
				43	0.000106424	3.209e-05							43	5.53694e-05	5.4871e-06
				44	6.75953e-05	2.55496e-05							44	5.4707e-05	5.42146e-06
				45	2.88125e-05	1.66352e-05							45	5.40528e-05	5.35663e-06
				46	4.80108e-05	2.14717e-05							46	5.34066e-05	5.29259e-06
				47	3.84241e-05	1.92125e-05							47	5.27683e-05	5.22933e-06
				48	7.64753e-05	2.70393e-05							48	5.21377e-05	5.16684e-06
				49	0.00010506	3.16788e-05							49	5.15147e-05	5.1051e-06
				nan	nan	nan							nan	nan	nan
				0	0.00262576	0.000318925							0	0.000771019	7.75853e-05
				1	0.00120802	0.00019611							1	0.000596774	6.00515e-05
				2	0.00125226	0.0001828							2	0.000465511	4.6843e-05
				3	0.000712003	0.000127934							3	0.000366582	3.6888e-05
				4	0.000648463	0.000112927							4	0.000291974	2.93805e-05
				5	0.000440338	8.80909e-05							5	0.000235663	2.37141e-05
				6	0.000405539	8.11276e-05							6	0.000193116	1.94327e-05
				7	0.000366074	7.4741e-05							7	0.000160924	1.61933e-05
				8	0.000353832	7.07815e-05							8	0.000136524	1.3738e-05
				9	0.000156155	4.50823e-05							9	0.000117986	1.18726e-05
				10	0.000215847	5.08822e-05							10	0.000103859	1.04511e-05
				11	0.000204931	4.83087e-05							11	9.30534e-05	9.36368e-06
				12	0.000108732	3.43864e-05							12	8.47472e-05	8.52786e-06
				13	0.000138038	3.82881e-05							13	7.83233e-05	7.88144e-06
				14	0.000135509	3.75864e-05							14	7.33174e-05	7.37771e-06
				15	0.000176893	4.29075e-05							15	6.93801e-05	6.98151e-06
				16	7.24302e-05	2.73772e-05							16	6.62485e-05	6.66639e-06
				17	0.000103895	3.28564e-05							17	6.37251e-05	6.41247e-06
				18	7.20236e-05	2.72235e-05							18	6.16612e-05	6.20478e-06
				19	0.000102849	3.25259e-05							19	5.99447e-05	6.03206e-06
				20	0.000124128	3.58352e-05							20	5.84917e-05	5.88584e-06
				21	0.000103168	3.26267e-05							21	5.72386e-05	5.75975e-06
				22	0.000153478	3.96314e-05							22	5.6138e-05	5.64899e-06
				23	6.14099e-05	2.50714e-05							23	5.51538e-05	5.54996e-06
				24	0.000193928	4.44954e-05							24	5.42591e-05	5.45993e-06
				25	6.10913e-05	2.49413e-05							25	5.34336e-05	5.37686e-06
				26	7.0799e-05	2.67606e-05							26	5.26619e-05	5.29921e-06
				27	0.000141865	3.79183e-05							27	5.19325e-05	5.22581e-06
				28	9.10595e-05	3.03548e-05							28	5.12367e-05	5.1558e-06
				29	0.000140254	3.74877e-05							29	5.05679e-05	5.0885e-06
				30	8.99433e-05	2.99827e-05							30	4.99212e-05	5.02342e-06
				31	0.000130641	3.62361e-05							31	4.92928e-05	4.96019e-06
				32	0.000109417	3.29927e-05							32	4.86799e-05	4.89851e-06
				33	0.0001093	3.29572e-05							33	4.80803e-05	4.83818e-06
				34	9.88891e-05	3.12733e-05							34	4.74923e-05	4.77901e-06
				35	8.85443e-05	2.95163e-05							35	4.69148e-05	4.7209e-06
				36	0.000108368	3.26763e-05							36	4.63467e-05	4.66373e-06
				37	0.000127622	3.53987e-05							37	4.57873e-05	4.60744e-06
				38	9.82615e-05	3.10748e-05							38	4.52361e-05	4.55197e-06
				39	9.7639e-05	3.0878e-05							39	4.46925e-05	4.49727e-06
				40	0.000107522	3.24211e-05							40	4.41562e-05	4.44331e-06
				41	5.86304e-05	2.39366e-05							41	4.36269e-05	4.39005e-06
				42	6.77952e-05	2.56252e-05							42	4.31044e-05	4.33747e-06
				43	0.000136077	3.63712e-05							43	4.25885e-05	4.28556e-06
				44	8.73363e-05	2.91136e-05							44	4.20791e-05	4.23429e-06
				45	8.66209e-05	2.88751e-05							45	4.15759e-05	4.18366e-06
				46	7.75351e-05	2.74141e-05							46	4.10789e-05	4.13364e-06
				47	0.000105289	3.17477e-05							47	4.05879e-05	4.08423e-06
				48	0.000134415	3.59267e-05							48	4.01028e-05	4.03543e-06
				49	0.000105352	3.17669e-05							49	3.96236e-05	3.98721e-06
				nan	nan	nan							nan	nan	nan
				0	0.000608645	0.00013821							0	0.000608645	0.00013821
				1	0.000471095	0.000106976							1	0.000471095	0.000106976
				2	0.000367476	8.34e-05							2	0.000367476	8.3446e-05
				3	0.000289381	6.57e-05							3	0.000289381	6.57122e-05
				4	0.000230485	5.23e-05							4	0.000230485	5.23383e-05
				5	0.000186033	4.22e-05							5	0.000186033	4.22442e-05
				6	0.000152446	3.46e-05							6	0.000152446	3.46173e-05
				7	0.000127034	2.88e-05							7	0.000127034	2.88468e-05
				8	0.000107772	2.45e-05							8	0.000107772	2.44728e-05
				9	9.31e-05	2.11e-05							9	9.31383e-05	2.11497e-05
				10	8.2e-05	1.86e-05							10	8.19869e-05	1.86175e-05
				11	7.35e-05	1.67e-05							11	7.34567e-05	1.66804e-05
				12	6.69e-05	1.52e-05							12	6.68997e-05	1.51915e-05
				13	6.18e-05	1.4e-05							13	6.18287e-05	1.404e-05
				14	5.79e-05	1.31e-05							14	5.7877e-05	1.31426e-05
				15	5.48e-05	1.24e-05							15	5.47688e-05	1.24368e-05
				16	5.23e-05	1.19e-05							16	5.22968e-05	1.18755e-05
				17	5.03e-05	1.14e-05							17	5.03048e-05	1.14232e-05
				18	4.87e-05	1.11e-05							18	4.86755e-05	1.10532e-05
				19	4.73e-05	1.07e-05							19	4.73206e-05	1.07455e-05
				20	4.62e-05	1.05e-05							20	4.61735e-05	1.0485e-05
				21	4.52e-05	1.03e-05							21	4.51844e-05	1.02604e-05
				22	4.43e-05	1.01e-05							22	4.43155e-05	1.00631e-05
				23	4.35e-05	9.89e-06							23	4.35386e-05	9.88669e-06
				24	4.28e-05	9.73e-06							24	4.28323e-05	9.72631e-06
				25	4.22e-05	9.58e-06							25	4.21806e-05	9.57833e-06
				26	4.16e-05	9.44e-06							26	4.15715e-05	9.44e-06
				27	4.1e-05	9.31e-06							27	4.09957e-05	9.30925e-06
				28	4.04e-05	9.18e-06							28	4.04464e-05	9.18452e-06
				29	3.99e-05	9.06e-06							29	3.99185e-05	9.06464e-06
				30	3.94e-05	8.95e-06							30	3.9408e-05	8.94871e-06
				31	3.89e-05	8.84e-06							31	3.89119e-05	8.83607e-06
				32	3.84e-05	8.73e-06							32	3.84281e-05	8.7262e-06
				33	3.8e-05	8.62e-06							33	3.79547e-05	8.61871e-06
				34	3.75e-05	8.51e-06							34	3.74906e-05	8.51332e-06
				35	3.7e-05	8.41e-06							35	3.70347e-05	8.40979e-06
				36	3.66e-05	8.31e-06							36	3.65863e-05	8.30796e-06
				37	3.61e-05	8.21e-06							37	3.61447e-05	8.20769e-06
				38	3.57e-05	8.11e-06							38	3.57095e-05	8.10887e-06
				39	3.53e-05	8.01e-06							39	3.52804e-05	8.01143e-06
				40	3.49e-05	7.92e-06							40	3.4857e-05	7.91529e-06
				41	3.44e-05	7.82e-06							41	3.44392e-05	7.82042e-06
				42	3.4e-05	7.73e-06							42	3.40268e-05	7.72676e-06
				43	3.36e-05	7.63e-06							43	3.36195e-05	7.63428e-06
				44	3.32e-05	7.54e-06							44	3.32174e-05	7.54296e-06
				45	3.28e-05	7.45e-06							45	3.28201e-05	7.45276e-06
				46	3.24e-05	7.36e-06							46	3.24278e-05	7.36366e-06
				47	3.2e-05	7.28e-06							47	3.20402e-05	7.27565e-06
				48	3.17e-05	7.19e-06							48	3.16573e-05	7.1887e-06
				49	3.13e-05	7.1e-06							49	3.1279e-05	7.1028e-06
				nan	nan	nan							nan	nan	nan
				0	0.000806403	0.000114403							0	0.000806403	0.000114403
				1	0.000624161	8.85e-05							1	0.000624161	8.85488e-05
				2	0.000486875	6.91e-05							2	0.000486875	6.90722e-05
				3	0.000383405	5.44e-05							3	0.000383405	5.43931e-05
				4	0.000305374	4.33e-05							4	0.000305374	4.33229e-05
				5	0.000246478	3.5e-05							5	0.000246478	3.49675e-05
				6	0.000201979	2.87e-05							6	0.000201979	2.86544e-05
				7	0.00016831	2.39e-05							7	0.00016831	2.38778e-05
				8	0.000142789	2.03e-05							8	0.000142789	2.02573e-05
				9	0.0001234	1.75e-05							9	0.0001234	1.75066e-05
				10	0.000108626	1.54e-05							10	0.000108626	1.54106e-05
				11	9.73e-05	1.38e-05							11	9.73239e-05	1.38072e-05
				12	8.86e-05	1.26e-05							12	8.86365e-05	1.25747e-05
				13	8.19e-05	1.16e-05							13	8.19178e-05	1.16216e-05
				14	7.67e-05	1.09e-05							14	7.66821e-05	1.08788e-05
				15	7.26e-05	1.03e-05							15	7.25641e-05	1.02946e-05
				16	6.93e-05	9.83e-06							16	6.92888e-05	9.8299e-06
				17	6.66e-05	9.46e-06							17	6.66496e-05	9.45548e-06
				18	6.45e-05	9.15e-06							18	6.4491e-05	9.14923e-06
[truncated: 695 more rows]

## Sheet: Figure 2
Figure 2
Uncorrected isotopic results
											238U/239Pu ion ratio		U/Pu ion ratio		Pu/U RSF using bulk 238U/239Pu ratio		Pu/U RSF using bulk (235U+238U)/(239Pu+240Pu) ratio
Particle	240Pu/239Pu	+/- 1σ	242Pu/239Pu	+/- 1σ	235U/238U	+/- 1σ	234U/238U	+/- 1σ	236U/238U	+/- 1σ	238U+/239Pu+	+/- 1σ	(235U+238U)+/(239Pu+240Pu)+	+/- 1σ	RSF	+/- 1σ	RSF	+/- 1σ
1	0.280564	0.000689054	0.00890368	0.000108371	0.052267	3.93297e-05	0.000616643	3.95278e-06	3.43938e-05	9.3857e-07	51.283	0.0610765	42.0305	0.0442207	2.04033	0.0120915	2.03495	0.0120857
2	0.281672	0.000669495	0.00885405	0.000104735	0.0522078	3.79073e-05	0.000620027	3.82284e-06	2.91112e-05	8.32806e-07	51.5722	0.0591555	42.2834	0.0428863	2.01593	0.0119325	2.01246	0.0119408
3	0.281021	0.000694174	0.00879221	0.000108348	0.0521226	3.94582e-05	0.000626408	4.00363e-06	2.86557e-05	8.60914e-07	50.9526	0.060489	41.8238	0.0439487	2.03318	0.0120522	2.02882	0.0120516
4	0.28133	0.000698562	0.00889957	0.000109636	0.052187	3.98391e-05	0.000617501	4.01102e-06	2.86506e-05	8.68638e-07	50.6965	0.0605428	41.6038	0.0439714	2.04399	0.012119	2.03998	0.01212
5	0.282205	0.000690856	0.00877712	0.000107419	0.0521917	3.93662e-05	0.000615519	3.95662e-06	2.73516e-05	8.38553e-07	50.642	0.0598087	41.515	0.0433602	2.05001	0.0121485	2.04737	0.0121589
6	0.282274	0.000678293	0.00897905	0.000106737	0.052163	3.86193e-05	0.000620243	3.89739e-06	2.91581e-05	8.49584e-07	50.7504	0.0589164	41.5885	0.0426837	2.0485	0.0121309	2.04603	0.0121442
7	0.281559	0.000652861	0.00881148	0.000101881	0.0521713	3.75662e-05	0.000620962	3.79252e-06	2.98488e-05	8.35973e-07	49.9874	0.0561187	40.9638	0.0406449	2.0855	0.0123336	2.08181	0.0123438
8	0.28179	0.000489065	0.00878455	7.61461e-05	0.0521788	2.79883e-05	0.000617797	2.81481e-06	2.86588e-05	6.09513e-07	50.4522	0.042269	41.3669	0.0306504	2.05906	0.0120821	2.05577	0.0121152
9	0.282677	0.0006872	0.00873021	0.000106452	0.0520228	3.90692e-05	0.00062125	3.95238e-06	2.90232e-05	8.58878e-07	50.4161	0.0592082	41.3025	0.0428823	2.06049	0.0122076	2.05892	0.0122251
10	0.28111	0.00066304	0.00902318	0.000104833	0.0521274	3.78295e-05	0.000620999	3.82137e-06	2.84729e-05	8.22665e-07	50.8353	0.0578654	41.6902	0.0419679	2.04618	0.012108	2.04192	0.0121128
11	0.281954	0.000665699	0.00875084	0.000103446	0.0520249	3.78497e-05	0.000625829	3.84228e-06	3.26635e-05	8.8252e-07	50.9679	0.0583295	41.7386	0.0421992	2.04766	0.0121177	2.04495	0.0121314
12	0.283454	0.000860342	0.00894429	0.000134704	0.0520647	4.84469e-05	0.000619449	4.89342e-06	2.68808e-05	1.02561e-06	51.0098	0.0745248	41.802	0.054026	2.0278	0.0121441	2.02741	0.0121397
13	0.283526	0.000682217	0.00893285	0.000106773	0.052048	3.85192e-05	0.000617633	3.88396e-06	2.75249e-05	8.2434e-07	51.249	0.0596535	41.9533	0.0431534	2.02812	0.0120115	2.02787	0.0120372
14	0.281537	0.000671079	0.00896436	0.000105668	0.0520225	3.81984e-05	0.00061729	3.85144e-06	2.88297e-05	8.36825e-07	50.9637	0.0588262	41.7525	0.0425868	2.04697	0.0121176	2.0436	0.0121266
15	0.282097	0.000674298	0.00896483	0.000106045	0.0521567	3.83799e-05	0.000622942	3.88192e-06	2.76523e-05	8.22279e-07	50.9158	0.0588619	41.7178	0.0426272	2.04466	0.0121056	2.04192	0.0121178
16	0.280933	0.000683389	0.00883797	0.000106963	0.052164	3.9118e-05	0.000617137	3.93782e-06	2.62339e-05	8.16264e-07	50.3594	0.0590051	41.3236	0.0428395	2.06145	0.0122125	2.05681	0.0122122
17	0.280159	0.000634333	0.00890659	9.97966e-05	0.052051	3.6465e-05	0.000613437	3.6639e-06	3.16735e-05	8.3704e-07	50.2919	0.0548596	41.2793	0.0398431	2.06658	0.0122108	2.0609	0.0122115
18	0.280794	0.000701601	0.00891769	0.000110362	0.0520528	3.99707e-05	0.000616115	4.02547e-06	2.81781e-05	8.65523e-07	50.8792	0.0612912	41.7379	0.0444748	2.04336	0.012118	2.03875	0.0121149
19	0.281695	0.000932969	0.00882687	0.000145786	0.0520119	5.2536e-05	0.000616949	5.29842e-06	2.7593e-05	1.13121e-06	51.2501	0.0820601	41.9922	0.0594256	2.03294	0.0122413	2.02986	0.0122068
20	0.28209	0.00069214	0.00899248	0.000108996	0.0520439	3.92529e-05	0.000621822	3.9717e-06	2.85626e-05	8.55805e-07	50.9797	0.0603061	41.7925	0.0437262	2.03579	0.0120651	2.03327	0.0120759
21	0.279458	0.000566627	0.00881246	8.8845e-05	0.0521757	3.28466e-05	0.000618232	3.3085e-06	2.97957e-05	7.30242e-07	49.8213	0.0485448	40.9358	0.0353184	2.08225	0.012262	2.07514	0.0122638
22	0.280778	0.000357012	0.00879663	5.57414e-05	0.0521478	2.06607e-05	0.000619192	2.07928e-06	3.03231e-05	4.65969e-07	50.2783	0.0309085	41.2369	0.0224173	2.07083	0.0120943	2.06595	0.0121309
23	0.281508	0.000586039	0.00887447	9.17995e-05	0.0521776	3.37132e-05	0.00062469	3.41354e-06	3.0635e-05	7.59999e-07	50.2701	0.0506803	41.1938	0.0367027	2.07454	0.0122265	2.07077	0.0122454
24	0.280869	0.00044292	0.00896536	6.98144e-05	0.0520993	2.54789e-05	0.000618553	2.56697e-06	2.87901e-05	5.56779e-07	50.5367	0.0384997	41.4458	0.027922	2.0598	0.0120649	2.05518	0.0120951
25	0.281071	0.000394095	0.00875322	6.13431e-05	0.0520597	2.2618e-05	0.00061683	2.27501e-06	2.85448e-05	4.92028e-07	50.6433	0.034255	41.5412	0.0248563	2.05155	0.0119957	2.04735	0.0120327
26	0.280916	0.00130371	0.00920913	0.000208872	0.0520449	7.38056e-05	0.00061985	7.46592e-06	2.58776e-05	1.57536e-06	51.3162	0.114865	42.085	0.0833087	2.02761	0.01261	2.02325	0.0124824
27	0.281477	0.000457398	0.00882633	7.14482e-05	0.052101	2.6167e-05	0.000617162	2.63371e-06	2.93529e-05	5.77465e-07	50.8308	0.0398691	41.6801	0.0289126	2.0447	0.0119828	2.04108	0.012017
28	0.281327	0.000428762	0.00886422	6.71504e-05	0.052105	2.46632e-05	0.000618942	2.48519e-06	2.87933e-05	5.389e-07	50.378	0.0370206	41.3243	0.0268662	2.06058	0.012063	2.05668	0.0120988
29	0.281672	0.000494238	0.00888245	7.74165e-05	0.0520994	2.81722e-05	0.000620178	2.8432e-06	2.83374e-05	6.11025e-07	51.202	0.0433747	41.9768	0.0314451	2.03024	0.0119156	2.02696	0.0119474
30	0.281113	0.000496238	0.00873958	7.71673e-05	0.0520953	2.83906e-05	0.00061508	2.85362e-06	2.94917e-05	6.28223e-07	51.0435	0.0435738	41.8444	0.0315781	2.04148	0.0119829	2.03731	0.0120095
31	0.281396	0.000550894	0.00893993	8.66174e-05	0.0520901	3.13977e-05	0.000619898	3.16928e-06	2.65467e-05	6.59381e-07	51.1321	0.0482834	41.9319	0.0350212	2.03212	0.0119565	2.02842	0.0119793
32	0.281368	0.000535853	0.00888508	8.39891e-05	0.0521736	3.06904e-05	0.000620407	3.09613e-06	2.875e-05	6.70087e-07	50.8581	0.0468619	41.6852	0.0339508	2.04936	0.0120497	2.04542	0.0120733
33	0.281703	0.000558549	0.00876919	8.69257e-05	0.0521956	3.19877e-05	0.000621651	3.2299e-06	2.92749e-05	7.04686e-07	50.7656	0.0487124	41.601	0.0352814	2.05269	0.0120816	2.04923	0.0121055
34	0.280911	0.000734445	0.00901221	0.000116112	0.0521212	4.22156e-05	0.000618927	4.25927e-06	2.84404e-05	9.18429e-07	50.0639	0.0630731	41.0768	0.0457863	2.07447	0.0123265	2.06984	0.0123184
35	0.281353	0.000430075	0.00886689	6.73501e-05	0.0521011	2.47712e-05	0.00061941	2.49692e-06	2.78636e-05	5.32427e-07	50.3038	0.0371479	41.2467	0.0269365	2.06748	0.012104	2.06363	0.0121401
36	0.280102	0.000448743	0.00874656	6.99948e-05	0.0521434	2.5878e-05	0.000621247	2.61171e-06	2.98061e-05	5.7514e-07	50.5917	0.039204	41.4975	0.0284308	2.06244	0.0120834	2.0565	0.0121052
37	0.280993	0.000565293	0.00887029	8.85976e-05	0.052145	3.24754e-05	0.000620674	3.27821e-06	3.00647e-05	7.2538e-07	50.5019	0.0491911	41.3942	0.0356354	2.06621	0.0121656	2.06169	0.0121826
38	0.280879	0.000432289	0.00885965	6.77492e-05	0.0521582	2.50141e-05	0.000616911	2.51487e-06	2.99657e-05	5.57245e-07	50.075	0.0372838	41.0598	0.0270289	2.08111	0.012185	2.07635	0.012216
39	0.28064	0.000427118	0.00882948	6.68535e-05	0.0521396	2.45521e-05	0.000619955	2.47499e-06	2.87503e-05	5.35847e-07	50.7509	0.0373089	41.6288	0.0270638	2.05148	0.0120093	2.04643	0.0120382
40	0.281694	0.000571821	0.00889971	8.96616e-05	0.0521676	3.27979e-05	0.000620675	3.31025e-06	3.04412e-05	7.37045e-07	50.5559	0.0497262	41.4176	0.0359967	2.06374	0.0121543	2.06031	0.0121769
	240Pu/239Pu		242Pu/239Pu		235U/238U		234U/238U		236U/238U		238U+/239Pu+		(235U+238U)+/(239Pu+240Pu)+		RSF	+-	RSF	+-
WM, SEM	0.281263	0.00012546	0.00885458	1.4224e-05	0.052124	9.40534e-06	0.000619194	4.41928e-07	2.90421e-05	2.36512e-07	50.6336	0.0668097	41.5178	0.0530339	2.05145	0.0026463	2.04763	0.00255681
Neff, 95% SEM	32.2169	0.000315662	32.1373	2.89734e-05	32.4747	3.06325e-05	32.4169	9.00177e-07	32.5885	8.64318e-07	32.1261	1.094	32.1403	0.953513	39.984	0.00736995	39.9882	0.00687558
MSWD, MSWD_unc	1.52574	0.253116	0.871667	0.25344	2.5566	0.252077	0.568544	0.252309	3.21874	0.251623	64.6249	0.253485	77.9099	0.253427	1.8958	0.226502	1.76751	0.22649
Format	Weighted Mean (WM)	Standard Error of the Weighted Mean (SEM)
	Effective number of degrees of freedom (Neff)	Expanded 95% uncertainty on SEM
	Mean Square of the Weighted Deviates (MSWD)	Uncertainty on MSWD (Based on effective number of degrees of freedom)
	Weighted standard deviation = SEM*sqrt(Neff)

## Sheet: Figure 3
Figure 3
Hydride-corrected results (version v.1)
											238U/239Pu ion ratio		U/Pu ion ratio		Pu/U RSF using bulk 238U/239Pu ratio		Pu/U RSF using bulk (235U+238U)/(239Pu+240Pu) ratio
Particle	240Pu/239Pu	+/- 1σ	242Pu/239Pu	+/- 1σ	235U/238U	+/- 1σ	234U/238U	+/- 1σ	236U/238U	+/- 1σ	238U+/239Pu+	+/- 1σ	(235U+238U)+/(239Pu+240Pu)+	+/- 1σ	RSF	+/- 1σ	RSF	+/- 1σ
1	0.28391	0.000699946	0.00901866	0.000109784	0.052267	3.93297e-05	0.000616643	3.95278e-06	2.09178e-05	9.38651e-07	50.6291	0.059557	41.6031	0.0433536	2.01431	0.0119432	2.01425	0.0119663
2	0.283357	0.000674771	0.00891112	0.000105416	0.0522078	3.79073e-05	0.000620027	3.82284e-06	2.24418e-05	8.32824e-07	51.242	0.0584141	42.0679	0.0424636	2.00302	0.0118589	2.0022	0.0118816
3	0.281768	0.000696601	0.00881738	0.000108661	0.0521226	3.94582e-05	0.000626408	4.00363e-06	2.56635e-05	8.60915e-07	50.8071	0.0601505	41.7287	0.0437553	2.02738	0.0120191	2.02421	0.012025
4	0.282146	0.000701233	0.00892742	0.000109982	0.052187	3.98391e-05	0.000617501	4.01102e-06	2.53523e-05	8.6864e-07	50.5383	0.0601727	41.5005	0.04376	2.03762	0.0120827	2.03491	0.0120908
5	0.283514	0.00069508	0.008821	0.000107961	0.0521917	3.93662e-05	0.000615519	3.95662e-06	2.20696e-05	8.38564e-07	50.39	0.0592261	41.3506	0.0430283	2.03981	0.0120903	2.03926	0.0121122
6	0.283953	0.000683614	0.00903663	0.000107428	0.052163	3.86193e-05	0.000620243	3.89739e-06	2.2417e-05	8.49602e-07	50.427	0.0581818	41.3776	0.0422653	2.03545	0.0120564	2.03566	0.0120843
7	0.283947	0.0006602	0.00889243	0.000102826	0.0521713	3.75662e-05	0.000620962	3.79252e-06	2.00518e-05	8.36016e-07	49.5324	0.0551206	40.6665	0.0400758	2.06652	0.0122252	2.0667	0.0122566
8	0.283265	0.000492445	0.0088342	7.65804e-05	0.0521788	2.79883e-05	0.000617797	2.81481e-06	2.26724e-05	6.09523e-07	50.1686	0.0418041	41.1817	0.0303853	2.04748	0.0120155	2.04656	0.0120618
9	0.284155	0.000691936	0.00877938	0.000107056	0.0520228	3.90692e-05	0.00062125	3.95238e-06	2.31641e-05	8.58892e-07	50.1337	0.0585591	41.1185	0.0425131	2.04895	0.0121418	2.04975	0.0121722
10	0.282921	0.000668675	0.0090859	0.000105569	0.0521274	3.78295e-05	0.000620999	3.82137e-06	2.11896e-05	8.22687e-07	50.4843	0.0570839	41.4609	0.0415219	2.03205	0.0120273	2.0307	0.012048
11	0.284651	0.000674102	0.00884108	0.000104522	0.0520249	3.78497e-05	0.000625829	3.84228e-06	2.19014e-05	8.82569e-07	50.4477	0.0571665	41.3995	0.0415374	2.02676	0.0119984	2.02834	0.0120355
12	0.283805	0.000861745	0.00895622	0.000134885	0.0520647	4.84469e-05	0.000619449	4.89342e-06	2.54876e-05	1.02561e-06	50.9418	0.07433	41.7577	0.0539153	2.0251	0.0121288	2.02526	0.0121274
13	0.285152	0.000687384	0.00898812	0.000107439	0.052048	3.85192e-05	0.000617633	3.88396e-06	2.10902e-05	8.24358e-07	50.9338	0.0589354	41.7481	0.0427455	2.01565	0.0119403	2.01796	0.01198
14	0.284111	0.000679197	0.00905297	0.000106722	0.0520225	3.81984e-05	0.00061729	3.85144e-06	1.85226e-05	8.36876e-07	50.4648	0.0577013	41.4269	0.0419458	2.02693	0.0120033	2.02766	0.0120346
15	0.284138	0.000680731	0.00903472	0.000106879	0.0521567	3.83799e-05	0.000622942	3.88192e-06	1.95052e-05	8.2231e-07	50.5219	0.0579714	41.4609	0.0421202	2.02884	0.0120153	2.02935	0.0120453
16	0.28223	0.000687539	0.00888189	0.000107499	0.052164	3.9118e-05	0.000617137	3.93782e-06	2.09755e-05	8.16275e-07	50.1104	0.0584339	41.1609	0.0425133	2.05125	0.0121543	2.04871	0.0121654
17	0.281747	0.000639075	0.00896108	0.000100413	0.052051	3.6465e-05	0.000613437	3.6639e-06	2.52024e-05	8.37055e-07	49.9861	0.0542068	41.0792	0.0394699	2.05401	0.0121389	2.05091	0.0121538
18	0.282469	0.000707117	0.00897506	0.000111078	0.0520528	3.99707e-05	0.000616115	4.02547e-06	2.14566e-05	8.65542e-07	50.554	0.0605245	41.5254	0.044037	2.0303	0.0120436	2.02837	0.0120551
19	0.283946	0.000942783	0.00890277	0.000147051	0.0520119	5.2536e-05	0.000616949	5.29842e-06	1.86608e-05	1.13126e-06	50.8132	0.080692	41.7073	0.0586464	2.01561	0.012144	2.01609	0.0121283
20	0.283314	0.000696103	0.0090346	0.000109511	0.0520439	3.92529e-05	0.000621822	3.9717e-06	2.36678e-05	8.55813e-07	50.742	0.0597554	41.6374	0.0434123	2.0263	0.012011	2.02572	0.0120324
21	0.280561	0.000569576	0.00885003	8.92271e-05	0.0521757	3.28466e-05	0.000618232	3.3085e-06	2.52615e-05	7.30247e-07	49.6098	0.0481413	40.7972	0.0350871	2.07341	0.0122113	2.06812	0.012223
22	0.282835	0.000360472	0.00886629	5.61868e-05	0.0521478	2.06607e-05	0.000619192	2.07928e-06	2.20637e-05	4.65989e-07	49.8833	0.030434	40.9787	0.0221464	2.05456	0.0120002	2.05301	0.0120556
23	0.284004	0.000592894	0.0089593	9.26849e-05	0.0521776	3.37132e-05	0.00062469	3.41354e-06	2.05801e-05	7.60041e-07	49.7941	0.0497429	40.8833	0.0361686	2.0549	0.012114	2.05516	0.0121551
24	0.282872	0.00044709	0.00903438	7.03568e-05	0.0520993	2.54789e-05	0.000618553	2.56697e-06	2.07542e-05	5.568e-07	50.1506	0.0379247	41.1935	0.0275938	2.04406	0.0119742	2.04267	0.0120223
25	0.282577	0.000396879	0.00880381	6.17008e-05	0.0520597	2.2618e-05	0.00061683	2.27501e-06	2.25219e-05	4.92036e-07	50.3522	0.0338699	41.351	0.0246365	2.03976	0.0119276	2.03798	0.0119781
26	0.282807	0.00131527	0.00927592	0.000210401	0.0520449	7.38056e-05	0.00061985	7.46592e-06	1.84143e-05	1.5754e-06	50.9467	0.113247	41.8437	0.0823847	2.01301	0.0125304	2.01164	0.0124177
27	0.283085	0.000460829	0.00888047	7.18904e-05	0.052101	2.6167e-05	0.000617162	2.63371e-06	2.29867e-05	5.77476e-07	50.5209	0.0393935	41.478	0.0286415	2.03223	0.011911	2.03118	0.0119595
28	0.282608	0.000431337	0.00890778	6.74834e-05	0.052105	2.46632e-05	0.000618942	2.48519e-06	2.36415e-05	5.38906e-07	50.1316	0.0366663	41.1634	0.0266639	2.0505	0.0120049	2.04867	0.0120522
29	0.28332	0.000498055	0.00893856	7.79099e-05	0.0520994	2.81722e-05	0.000620178	2.8432e-06	2.18287e-05	6.11038e-07	50.8807	0.042842	41.767	0.0311413	2.0175	0.0118423	2.01683	0.0118886
30	0.283388	0.000501553	0.0088161	7.7849e-05	0.0520953	2.83906e-05	0.00061508	2.85362e-06	2.04469e-05	6.28253e-07	50.6004	0.0428346	41.5549	0.0311564	2.02376	0.011881	2.02321	0.0119277
31	0.282927	0.000554849	0.00899244	8.71308e-05	0.0520901	3.13977e-05	0.000619898	3.16928e-06	2.04872e-05	6.59395e-07	50.8336	0.0477317	41.7369	0.0347063	2.02026	0.0118884	2.01899	0.0119247
32	0.283707	0.000541732	0.00896476	8.47492e-05	0.0521736	3.06904e-05	0.000620407	3.09613e-06	1.94383e-05	6.70121e-07	50.406	0.0460479	41.39	0.0334867	2.03114	0.0119451	2.03094	0.0119894
33	0.283993	0.000564542	0.00884609	8.76949e-05	0.0521956	3.19877e-05	0.000621651	3.2299e-06	2.01381e-05	7.04719e-07	50.3243	0.0478848	41.313	0.0348098	2.03484	0.0119792	2.03505	0.0120233
34	0.282313	0.000739274	0.00906071	0.000116743	0.0521212	4.22156e-05	0.000618927	4.25927e-06	2.27699e-05	9.18442e-07	49.796	0.0624122	40.9017	0.0454089	2.06336	0.0122634	2.06102	0.0122676
35	0.283124	0.00043365	0.00892716	6.78121e-05	0.0521011	2.47712e-05	0.00061941	2.49692e-06	2.07209e-05	5.32443e-07	49.9641	0.0366575	41.0249	0.0266567	2.05352	0.0120236	2.05253	0.0120756
36	0.282721	0.00045428	0.00883481	7.07073e-05	0.0521434	2.5878e-05	0.000621247	2.61171e-06	1.92852e-05	5.75178e-07	50.0864	0.0384393	41.1671	0.027994	2.04184	0.0119647	2.04012	0.01201
37	0.283641	0.000572306	0.00896023	8.95041e-05	0.052145	3.24754e-05	0.000620674	3.27821e-06	1.9463e-05	7.25426e-07	49.995	0.0482267	41.0634	0.0350856	2.04547	0.0120466	2.04521	0.0120871
38	0.283173	0.000436955	0.00893784	6.83526e-05	0.0521582	2.50141e-05	0.000616911	2.51487e-06	2.06548e-05	5.57273e-07	49.6369	0.0366466	40.7735	0.0266652	2.06291	0.0120801	2.06187	0.0121318
39	0.282695	0.000431235	0.00889908	6.73853e-05	0.0521396	2.45521e-05	0.000619955	2.47499e-06	2.0548e-05	5.35869e-07	50.354	0.0367385	41.3695	0.0267382	2.03543	0.0119168	2.03369	0.0119641
40	0.284315	0.000578829	0.00898883	9.05676e-05	0.0521676	3.27979e-05	0.000620675	3.31025e-06	1.99457e-05	7.37091e-07	50.0547	0.0487632	41.0908	0.0354484	2.04328	0.012037	2.04406	0.0120827
	240Pu/239Pu		242Pu/239Pu		235U/238U		234U/238U		236U/238U		238U+/239Pu+		(235U+238U)+/(239Pu+240Pu)+		RSF	+-	RSF	+-
WM, SEM	0.283138	0.00014181	0.0089183	1.44062e-05	0.052124	9.40534e-06	0.000619194	4.41928e-07	2.15792e-05	3.07697e-07	50.2715	0.0682188	41.2813	0.0541603	2.03711	0.00256555	2.03623	0.00248518
Neff, 95% SEM	32.2294	0.000390087	32.1476	2.93445e-05	32.4747	3.06325e-05	32.4169	9.00177e-07	32.5886	1.52566e-06	32.1055	1.16578	32.124	1.01122	39.9833	0.00696934	39.988	0.00652904
MSWD, MSWD_unc	1.82372	0.253066	0.882035	0.253398	2.5566	0.252077	0.568544	0.252309	5.92537	0.251623	70.3829	0.253569	84.0177	0.253494	1.80369	0.226504	1.68703	0.22649
Format	Weighted Mean (WM)	Standard Error of the Weighted Mean (SEM)
	Effective number of degrees of freedom (Neff)	Expanded 95% uncertainty on SEM
	Mean Square of the Weighted Deviates (MSWD)	Uncertainty on MSWD (Based on effective number of degrees of freedom)
	Weighted standard deviation = SEM*sqrt(Neff)

## Sheet: Figure 4
Figure 4
Hydride-corrected results (version v.2)
											238U/239Pu ion ratio		U/Pu ion ratio		Pu/U RSF using bulk 238U/239Pu ratio		Pu/U RSF using bulk (235U+238U)/(239Pu+240Pu) ratio
Particle	240Pu/239Pu	+/- 1σ	242Pu/239Pu	+/- 1σ	235U/238U	+/- 1σ	234U/238U	+/- 1σ	236U/238U	+/- 1σ	238U+/239Pu+	+/- 1σ	(235U+238U)+/(239Pu+240Pu)+	+/- 1σ	RSF	+/- 1σ	RSF	+/- 1σ
1	0.28391	0.000699946	0.00901866	0.000109784	0.052267	3.93297e-05	0.000616643	3.95278e-06	2.09178e-05	9.38651e-07	51.283	0.0610765	42.0305	0.0442207	2.01431	0.0119432	2.01425	0.0119663
2	0.283357	0.000674771	0.00891112	0.000105416	0.0522078	3.79073e-05	0.000620027	3.82284e-06	2.24418e-05	8.32824e-07	51.5722	0.0591555	42.2834	0.0428863	2.00302	0.0118589	2.0022	0.0118816
3	0.281768	0.000696601	0.00881738	0.000108661	0.0521226	3.94582e-05	0.000626408	4.00363e-06	2.56635e-05	8.60915e-07	50.9526	0.060489	41.8238	0.0439487	2.02738	0.0120191	2.02421	0.012025
4	0.282146	0.000701233	0.00892742	0.000109982	0.052187	3.98391e-05	0.000617501	4.01102e-06	2.53523e-05	8.6864e-07	50.6965	0.0605428	41.6038	0.0439714	2.03762	0.0120827	2.03491	0.0120908
5	0.283514	0.00069508	0.008821	0.000107961	0.0521917	3.93662e-05	0.000615519	3.95662e-06	2.20696e-05	8.38564e-07	50.642	0.0598087	41.515	0.0433602	2.03981	0.0120903	2.03926	0.0121122
6	0.283953	0.000683614	0.00903663	0.000107428	0.052163	3.86193e-05	0.000620243	3.89739e-06	2.2417e-05	8.49602e-07	50.7504	0.0589164	41.5885	0.0426837	2.03545	0.0120564	2.03566	0.0120843
7	0.283947	0.0006602	0.00889243	0.000102826	0.0521713	3.75662e-05	0.000620962	3.79252e-06	2.00518e-05	8.36016e-07	49.9874	0.0561187	40.9638	0.0406449	2.06652	0.0122252	2.0667	0.0122566
8	0.283265	0.000492445	0.0088342	7.65804e-05	0.0521788	2.79883e-05	0.000617797	2.81481e-06	2.26724e-05	6.09523e-07	50.4522	0.042269	41.3669	0.0306504	2.04748	0.0120155	2.04656	0.0120618
9	0.284155	0.000691936	0.00877938	0.000107056	0.0520228	3.90692e-05	0.00062125	3.95238e-06	2.31641e-05	8.58892e-07	50.4161	0.0592082	41.3025	0.0428823	2.04895	0.0121418	2.04975	0.0121722
10	0.282921	0.000668675	0.0090859	0.000105569	0.0521274	3.78295e-05	0.000620999	3.82137e-06	2.11896e-05	8.22687e-07	50.8353	0.0578654	41.6902	0.0419679	2.03205	0.0120273	2.0307	0.012048
11	0.284651	0.000674102	0.00884108	0.000104522	0.0520249	3.78497e-05	0.000625829	3.84228e-06	2.19014e-05	8.82569e-07	50.9679	0.0583295	41.7386	0.0421992	2.02676	0.0119984	2.02834	0.0120355
12	0.283805	0.000861745	0.00895622	0.000134885	0.0520647	4.84469e-05	0.000619449	4.89342e-06	2.54876e-05	1.02561e-06	51.0098	0.0745248	41.802	0.054026	2.0251	0.0121288	2.02526	0.0121274
13	0.285152	0.000687384	0.00898812	0.000107439	0.052048	3.85192e-05	0.000617633	3.88396e-06	2.10902e-05	8.24358e-07	51.249	0.0596535	41.9533	0.0431534	2.01565	0.0119403	2.01796	0.01198
14	0.284111	0.000679197	0.00905297	0.000106722	0.0520225	3.81984e-05	0.00061729	3.85144e-06	1.85226e-05	8.36876e-07	50.9637	0.0588262	41.7525	0.0425868	2.02693	0.0120033	2.02766	0.0120346
15	0.284138	0.000680731	0.00903472	0.000106879	0.0521567	3.83799e-05	0.000622942	3.88192e-06	1.95052e-05	8.2231e-07	50.9158	0.0588619	41.7178	0.0426272	2.02884	0.0120153	2.02935	0.0120453
16	0.28223	0.000687539	0.00888189	0.000107499	0.052164	3.9118e-05	0.000617137	3.93782e-06	2.09755e-05	8.16275e-07	50.3594	0.0590051	41.3236	0.0428395	2.05125	0.0121543	2.04871	0.0121654
17	0.281747	0.000639075	0.00896108	0.000100413	0.052051	3.6465e-05	0.000613437	3.6639e-06	2.52024e-05	8.37055e-07	50.2919	0.0548596	41.2793	0.0398431	2.05401	0.0121389	2.05091	0.0121538
18	0.282469	0.000707117	0.00897506	0.000111078	0.0520528	3.99707e-05	0.000616115	4.02547e-06	2.14566e-05	8.65542e-07	50.8792	0.0612912	41.7379	0.0444748	2.0303	0.0120436	2.02837	0.0120551
19	0.283946	0.000942783	0.00890277	0.000147051	0.0520119	5.2536e-05	0.000616949	5.29842e-06	1.86608e-05	1.13126e-06	51.2501	0.0820601	41.9922	0.0594256	2.01561	0.012144	2.01609	0.0121283
20	0.283314	0.000696103	0.0090346	0.000109511	0.0520439	3.92529e-05	0.000621822	3.9717e-06	2.36678e-05	8.55813e-07	50.9797	0.0603061	41.7925	0.0437262	2.0263	0.012011	2.02572	0.0120324
21	0.280561	0.000569576	0.00885003	8.92271e-05	0.0521757	3.28466e-05	0.000618232	3.3085e-06	2.52615e-05	7.30247e-07	49.8213	0.0485448	40.9358	0.0353184	2.07341	0.0122113	2.06812	0.012223
22	0.282835	0.000360472	0.00886629	5.61868e-05	0.0521478	2.06607e-05	0.000619192	2.07928e-06	2.20637e-05	4.65989e-07	50.2783	0.0309085	41.2369	0.0224173	2.05456	0.0120002	2.05301	0.0120556
23	0.284004	0.000592894	0.0089593	9.26849e-05	0.0521776	3.37132e-05	0.00062469	3.41354e-06	2.05801e-05	7.60041e-07	50.2701	0.0506803	41.1938	0.0367027	2.0549	0.012114	2.05516	0.0121551
24	0.282872	0.00044709	0.00903438	7.03568e-05	0.0520993	2.54789e-05	0.000618553	2.56697e-06	2.07542e-05	5.568e-07	50.5367	0.0384997	41.4458	0.027922	2.04406	0.0119742	2.04267	0.0120223
25	0.282577	0.000396879	0.00880381	6.17008e-05	0.0520597	2.2618e-05	0.00061683	2.27501e-06	2.25219e-05	4.92036e-07	50.6433	0.034255	41.5412	0.0248563	2.03976	0.0119276	2.03798	0.0119781
26	0.282807	0.00131527	0.00927592	0.000210401	0.0520449	7.38056e-05	0.00061985	7.46592e-06	1.84143e-05	1.5754e-06	51.3162	0.114865	42.085	0.0833087	2.01301	0.0125304	2.01164	0.0124177
27	0.283085	0.000460829	0.00888047	7.18904e-05	0.052101	2.6167e-05	0.000617162	2.63371e-06	2.29867e-05	5.77476e-07	50.8308	0.0398691	41.6801	0.0289126	2.03223	0.011911	2.03118	0.0119595
28	0.282608	0.000431337	0.00890778	6.74834e-05	0.052105	2.46632e-05	0.000618942	2.48519e-06	2.36415e-05	5.38906e-07	50.378	0.0370206	41.3243	0.0268662	2.0505	0.0120049	2.04867	0.0120522
29	0.28332	0.000498055	0.00893856	7.79099e-05	0.0520994	2.81722e-05	0.000620178	2.8432e-06	2.18287e-05	6.11038e-07	51.202	0.0433747	41.9768	0.0314451	2.0175	0.0118423	2.01683	0.0118886
30	0.283388	0.000501553	0.0088161	7.7849e-05	0.0520953	2.83906e-05	0.00061508	2.85362e-06	2.04469e-05	6.28253e-07	51.0435	0.0435738	41.8444	0.0315781	2.02376	0.011881	2.02321	0.0119277
31	0.282927	0.000554849	0.00899244	8.71308e-05	0.0520901	3.13977e-05	0.000619898	3.16928e-06	2.04872e-05	6.59395e-07	51.1321	0.0482834	41.9319	0.0350212	2.02026	0.0118884	2.01899	0.0119247
32	0.283707	0.000541732	0.00896476	8.47492e-05	0.0521736	3.06904e-05	0.000620407	3.09613e-06	1.94383e-05	6.70121e-07	50.8581	0.0468619	41.6852	0.0339508	2.03114	0.0119451	2.03094	0.0119894
33	0.283993	0.000564542	0.00884609	8.76949e-05	0.0521956	3.19877e-05	0.000621651	3.2299e-06	2.01381e-05	7.04719e-07	50.7656	0.0487124	41.601	0.0352814	2.03484	0.0119792	2.03505	0.0120233
34	0.282313	0.000739274	0.00906071	0.000116743	0.0521212	4.22156e-05	0.000618927	4.25927e-06	2.27699e-05	9.18442e-07	50.0639	0.0630731	41.0768	0.0457863	2.06336	0.0122634	2.06102	0.0122676
35	0.283124	0.00043365	0.00892716	6.78121e-05	0.0521011	2.47712e-05	0.00061941	2.49692e-06	2.07209e-05	5.32443e-07	50.3038	0.0371479	41.2467	0.0269365	2.05352	0.0120236	2.05253	0.0120756
36	0.282721	0.00045428	0.00883481	7.07073e-05	0.0521434	2.5878e-05	0.000621247	2.61171e-06	1.92852e-05	5.75178e-07	50.5917	0.039204	41.4975	0.0284308	2.04184	0.0119647	2.04012	0.01201
37	0.283641	0.000572306	0.00896023	8.95041e-05	0.052145	3.24754e-05	0.000620674	3.27821e-06	1.9463e-05	7.25426e-07	50.5019	0.0491911	41.3942	0.0356354	2.04547	0.0120466	2.04521	0.0120871
38	0.283173	0.000436955	0.00893784	6.83526e-05	0.0521582	2.50141e-05	0.000616911	2.51487e-06	2.06548e-05	5.57273e-07	50.075	0.0372838	41.0598	0.0270289	2.06291	0.0120801	2.06187	0.0121318
39	0.282695	0.000431235	0.00889908	6.73853e-05	0.0521396	2.45521e-05	0.000619955	2.47499e-06	2.0548e-05	5.35869e-07	50.7509	0.0373089	41.6288	0.0270638	2.03543	0.0119168	2.03369	0.0119641
40	0.284315	0.000578829	0.00898883	9.05676e-05	0.0521676	3.27979e-05	0.000620675	3.31025e-06	1.99457e-05	7.37091e-07	50.5559	0.0497262	41.4176	0.0359967	2.04328	0.012037	2.04406	0.0120827
	240Pu/239Pu		242Pu/239Pu		235U/238U		234U/238U		236U/238U		238U+/239Pu+		(235U+238U)+/(239Pu+240Pu)+		RSF	+-	RSF	+-
WM, SEM	0.283138	0.00014181	0.0089183	1.44062e-05	0.052124	9.40534e-06	0.000619194	4.41928e-07	2.15792e-05	3.07697e-07	50.6336	0.0668097	41.5178	0.0530339	2.03711	0.00256555	2.03623	0.00248518
Neff, 95% SEM	32.2294	0.000390087	32.1476	2.93445e-05	32.4747	3.06325e-05	32.4169	9.00177e-07	32.5886	1.52566e-06	32.1261	1.094	32.1403	0.953513	39.9833	0.00696934	39.988	0.00652904
MSWD, MSWD_unc	1.82372	0.253066	0.882035	0.253398	2.5566	0.252077	0.568544	0.252309	5.92537	0.251623	64.6249	0.253485	77.9099	0.253427	1.80369	0.226504	1.68703	0.22649
Format	Weighted Mean (WM)	Standard Error of the Weighted Mean (SEM)
	Effective number of degrees of freedom (Neff)	Expanded 95% uncertainty on SEM
	Mean Square of the Weighted Deviates (MSWD)	Uncertainty on MSWD (Based on effective number of degrees of freedom)
	Weighted standard deviation = SEM*sqrt(Neff)

## Sheet: Figure 5
Figure 5
CRM U900 Certificate values
234U/238U	unc	235U/238U	unc	236U/238U	unc
0.0894628	0.000191188	10.3757	0.00963204	0.0382722	0.000120306
Particle	234U/238U	+/- 1σ	235U/238U	+/- 1σ	236U/238U	+/- 1σ	Δ[234U/238U]	+/- 1σ	Δ[235U/238U]	+/- 1σ	Δ[236U/238U]	+/- 1σ
1	0.0883384	0.000607686	10.2985	0.0331449	0.0375042	0.000542132	-0.0125677	0.00711285	-0.00743652	0.0033247	-0.0200669	0.0144962
2	0.0889437	0.000206466	10.3438	0.0113263	0.0382249	0.000198634	-0.00580191	0.00313694	-0.00307236	0.00143113	-0.00123443	0.00606575
3	0.0884208	0.000615238	10.3085	0.0335516	0.0380247	0.000751973	-0.0116475	0.00719408	-0.00647396	0.00336263	-0.0064665	0.0198947
4	0.0897096	0.00023223	10.3787	0.0136786	0.0384584	0.000262262	0.00275885	0.0033661	0.00029149	0.00161254	0.00486621	0.00754553
5	0.0896289	0.000231366	10.3819	0.0120608	0.0394009	0.00038671	0.00185647	0.00335743	0.000594321	0.00148795	0.0294921	0.0106098
6	0.0895035	0.000211529	10.4149	0.0116165	0.0381072	0.000206133	0.000455434	0.00318775	0.00378011	0.00145664	-0.00431015	0.00622936
7	0.0896821	0.000266842	10.4094	0.0121332	0.0383639	0.00022519	0.00245127	0.00367234	0.00324649	0.00149495	0.00239651	0.00667451
8	0.089392	0.000205182	10.4162	0.011954	0.0384146	0.000237875	-0.000791558	0.00313367	0.00389897	0.00148186	0.0037203	0.00697033
9	0.090668	0.000305814	10.4482	0.0154778	0.0385926	0.000283756	0.0134714	0.00404672	0.00699112	0.00176044	0.00837232	0.00806331
10	0.0896415	0.000190798	10.3962	0.0107294	0.038393	0.000173363	0.00199806	0.00302221	0.00197877	0.00139088	0.00315803	0.00551925
11	0.0898038	0.000271057	10.3941	0.0147921	0.0387779	0.000309613	0.00381184	0.00371239	0.00177552	0.00170215	0.0132147	0.00869417
12	0.0899206	0.000269012	10.3667	0.014592	0.0379537	0.000269906	0.00511697	0.00369537	-0.000865579	0.00168468	-0.00832256	0.00771052
13	0.0898803	0.000208098	10.3874	0.0142819	0.0384522	0.00021595	0.00466646	0.00316551	0.00112887	0.00166085	0.00470496	0.00646621
14	0.0895154	0.00016706	10.3749	0.00797966	0.0384168	0.000140081	0.000587567	0.00283892	-7.45947e-05	0.00120546	0.00378021	0.00483244
15	0.0896562	0.000191669	10.3971	0.0103252	0.0382882	0.00019902	0.00216221	0.00302934	0.00206617	0.00136222	0.000417569	0.00607707
16	0.0894818	0.000177759	10.364	0.00975404	0.0384409	0.000186225	0.000213087	0.00291839	-0.00113212	0.00132045	0.00440975	0.0058004
17	0.0892701	0.000171894	10.3627	0.00945143	0.0384335	0.00015992	-0.00215388	0.0028704	-0.00125367	0.00129977	0.00421552	0.00523683
18	0.0894778	0.000315413	10.3679	0.0171928	0.03856	0.000291116	0.000167559	0.00412294	-0.000753691	0.00189901	0.00752097	0.00823947
19	0.0897502	0.000170635	10.3874	0.00882164	0.0384424	0.000198873	0.00321217	0.00286955	0.00112997	0.00125961	0.00444756	0.00608034
20	0.0894969	0.00021815	10.3806	0.0107518	0.0383537	0.000193391	0.000381828	0.00324292	0.000470003	0.00139155	0.00213059	0.00595454
21	0.0896264	0.000227242	10.3736	0.0112349	0.0383644	0.000201498	0.00182862	0.00332201	-0.000207364	0.00142615	0.00240861	0.00613578
22	0.0893451	0.000254949	10.3663	0.0127909	0.038158	0.000227378	-0.00131603	0.00356038	-0.000903823	0.00154271	-0.00298393	0.00671705
23	0.0891334	0.00028492	10.3174	0.018148	0.0381452	0.000271903	-0.0036818	0.00383097	-0.00562196	0.00197774	-0.00331841	0.00776459
24	0.0896476	0.000185888	10.368	0.0101858	0.0385411	0.000175262	0.00206602	0.00298384	-0.00074452	0.00135064	0.0070254	0.00556695
25	0.0890427	0.0002913	10.3605	0.0182684	0.0384998	0.000333064	-0.00469529	0.00388927	-0.00146099	0.0019898	0.00594771	0.0092592
26	0.0887674	0.000442666	10.3058	0.024096	0.037872	0.000414267	-0.00777249	0.00538326	-0.00673826	0.0024987	-0.0104563	0.0112623
27	0.0888227	0.00030615	10.3499	0.0137508	0.0384718	0.000254173	-0.00715481	0.0040265	-0.00248569	0.00161675	0.00521628	0.0073546
28	0.0889292	0.00021202	10.3556	0.0116377	0.0381007	0.000205628	-0.00596462	0.00318265	-0.00193333	0.00145482	-0.00447963	0.00621769
29	0.0893917	0.000206154	10.369	0.0100788	0.0385461	0.000174867	-0.000794714	0.00314163	-0.000646247	0.00134323	0.00715794	0.00555872
30	0.0894536	0.000162384	10.3929	0.00896366	0.0381423	0.000248623	-0.000102147	0.0028037	0.00165301	0.00126924	-0.00339457	0.00721211
31	0.0896916	0.000205962	10.3707	0.0109182	0.0381562	0.000251329	0.00255803	0.00314493	-0.00047963	0.00140295	-0.00303136	0.00727636
32	0.0890866	0.000327311	10.391	0.0179168	0.0381974	0.000415065	-0.00420515	0.00423252	0.001475	0.00196117	-0.00195279	0.0112897
33	0.0895359	0.000232418	10.3904	0.0127238	0.0379558	0.000243618	0.000817408	0.00336508	0.00141543	0.00153885	-0.0082655	0.00708781
34	0.0894586	0.000239896	10.3808	0.0131232	0.0382101	0.00023412	-4.72388e-05	0.00342887	0.000491787	0.00156919	-0.00162074	0.00687531
35	0.089647	0.000184265	10.3843	0.0118734	0.0380995	0.000164845	0.00205952	0.00297123	0.000825652	0.00147403	-0.0045119	0.0053239
36	0.089306	0.0001555	10.3716	0.00797243	0.038449	0.000145959	-0.00175301	0.00275177	-0.000400216	0.00120478	0.00462054	0.00495147
37	0.0896203	0.000253735	10.3779	0.0138515	0.038159	0.000270443	0.00176072	0.00355348	0.000211219	0.00162615	-0.00295673	0.00773018
38	0.0895192	0.00029362	10.3859	0.0160276	0.0385497	0.000344557	0.000630301	0.00391721	0.000978386	0.00180268	0.00725017	0.00954336
39	0.0895418	0.000237608	10.3636	0.0129756	0.0383489	0.000227198	0.000883339	0.00341016	-0.00116735	0.00155683	0.00200513	0.00672023
40	0.0895598	0.00022596	10.3796	0.0123586	0.0378747	0.0002342	0.00108453	0.00331004	0.000375772	0.00151036	-0.0103846	0.00686464
41	0.0895765	0.000236395	10.3682	0.0129103	0.0382503	0.000227707	0.00127137	0.00340012	-0.000726843	0.00155202	-0.000571638	0.00672819
42	0.0893983	0.000292512	10.3681	0.0182019	0.0383211	0.000250025	-0.000721137	0.00390526	-0.000736302	0.00198445	0.0012795	0.00725149
43	0.0896108	0.000203216	10.3784	0.0110935	0.0382658	0.000205455	0.00165428	0.00312121	0.000257235	0.00141611	-0.000167506	0.00622061
44	0.0898996	0.000242583	10.3762	0.0123391	0.0382984	0.000231332	0.00488281	0.00345895	4.71253e-05	0.00150869	0.000684699	0.00681391
45	0.0893768	0.00022037	10.3536	0.0120488	0.0383233	0.000220667	-0.000960979	0.00325974	-0.00212988	0.00148547	0.00133574	0.00656895
46	0.0890883	0.000271456	10.3549	0.0133455	0.0384537	0.000253852	-0.00418541	0.00370619	-0.00200799	0.00158516	0.00474433	0.00734638
47	0.0895241	0.000263278	10.3694	0.0129441	0.0383026	0.000218889	0.000685033	0.00363784	-0.000607198	0.0015547	0.000793838	0.00652741
48	0.0894343	0.000242391	10.3599	0.0132423	0.0382567	0.000219042	-0.000318557	0.00345037	-0.0015228	0.00157736	-0.000404295	0.0065291
49	0.0895166	0.000224957	10.3548	0.0122898	0.0384495	0.000221379	0.000601364	0.00330082	-0.00201053	0.00150377	0.0046339	0.00659027
50	0.0898171	0.000267441	10.4121	0.0151254	0.0384436	0.000337293	0.00396066	0.00367966	0.00350944	0.00173001	0.0044804	0.00936157
51	0.0897365	0.000216083	10.3882	0.0118209	0.0385974	0.000219516	0.00305999	0.00322938	0.00120399	0.00147032	0.00849699	0.00655343
52	0.0894322	0.000258811	10.3856	0.0136904	0.0388131	0.000294321	-0.000342193	0.00359626	0.000952111	0.00161382	0.0141343	0.00832478
53	0.0896742	0.000222598	10.3912	0.01218	0.0384437	0.000256126	0.00236285	0.00328323	0.00149629	0.00149746	0.00448283	0.00739973
54	0.0892209	0.000236638	10.3644	0.0129523	0.0383706	0.000231608	-0.00270376	0.0033969	-0.00108948	0.00155507	0.00257077	0.00682305
55	0.089868	0.000230203	10.4034	0.0125853	0.0385322	0.000287519	0.00452921	0.00335108	0.00267291	0.00152894	0.00679361	0.00815189
56	0.0889977	0.000432258	10.3397	0.0235564	0.0385484	0.000425788	-0.00519912	0.00527874	-0.00347116	0.00245158	0.00721634	0.011567
57	0.089569	0.000197883	10.3783	0.0111299	0.0381857	0.000195502	0.00118677	0.00307741	0.000252274	0.00141877	-0.00225832	0.00599418
58	0.0899909	0.000353393	10.371	0.0191932	0.0386618	0.000341272	0.00590362	0.00449722	-0.000455728	0.00206951	0.0101816	0.00946552
59	0.0894463	0.000223391	10.364	0.0122165	0.0380063	0.000232852	-0.000184696	0.00328641	-0.00113011	0.00149872	-0.00694675	0.00683819
60	0.0893847	0.000247246	10.3667	0.0143997	0.0383493	0.000257265	-0.00087248	0.00349242	-0.000864316	0.00166925	0.00201442	0.00742335
61	0.0895373	0.000242564	10.3699	0.0152833	0.0384529	0.000258666	0.000832996	0.00345341	-0.000563292	0.00174084	0.00472339	0.00746012
62	0.0888404	0.000282009	10.3604	0.0133773	0.0381051	0.000254888	-0.00695727	0.00380006	-0.00147499	0.00158793	-0.00436656	0.0073586
63	0.0877707	0.00132117	10.2042	0.059778	0.0366239	0.00122573	-0.0189136	0.0149159	-0.016534	0.00583323	-0.0430659	0.0321676
64	0.0893314	0.000263134	10.3672	0.0129684	0.0380097	0.000266189	-0.00146904	0.00363383	-0.000822679	0.00155646	-0.00685809	0.00762367
65	0.0902395	0.000366041	10.4085	0.0182651	0.0385917	0.000300682	0.00868245	0.00462466	0.00315741	0.00199152	0.00834902	0.00847171
66	0.0895194	0.000265127	10.3528	0.0144518	0.0385894	0.000263336	0.000632404	0.00365451	-0.00220883	0.00167273	0.00828825	0.00757551
67	0.088922	0.000657784	10.3858	0.0694183	0.0390131	0.000210338	-0.00604475	0.00765328	0.000975397	0.00675469	0.0193597	0.00636176
68	0.0896303	0.000233024	10.3899	0.0111593	0.0382165	0.000261934	0.00187189	0.00337174	0.00136721	0.00142158	-0.00145568	0.00752944
69	0.0893712	0.00027442	10.3692	0.0149938	0.0380168	0.000308622	-0.00102347	0.00373722	-0.000631238	0.00171726	-0.00667268	0.00864729
70	0.0894516	0.000264841	10.3764	0.00946018	0.0382681	0.000178572	-0.000125447	0.00365097	6.48049e-05	0.00130124	-0.000105359	0.00562575
71	0.0896126	0.000385142	10.3892	0.0166406	0.0379724	0.000322791	0.00167427	0.00480789	0.00129706	0.0018537	-0.00783305	0.00899227
72	0.0890278	0.00029811	10.3701	0.0163085	0.038536	0.00032959	-0.00486169	0.00395303	-0.000540048	0.00182521	0.00689238	0.00917495
73	0.0899268	0.000298282	10.3872	0.0142965	0.0383646	0.000269549	0.00518673	0.00396625	0.00110723	0.001662	0.0024152	0.00771571
74	0.0895994	0.00025955	10.3822	0.0131862	0.0381506	0.000293271	0.00152699	0.00360527	0.000630469	0.00157416	-0.00317726	0.00827868
75	0.0894814	0.000244904	10.396	0.0134099	0.0387828	0.000264225	0.000207637	0.00347316	0.00196007	0.00159234	0.0133431	0.00760327
76	0.0899548	0.00029203	10.3916	0.0159093	0.0383288	0.000295126	0.00549952	0.00390805	0.00153614	0.00179318	0.00148025	0.00832908
77	0.0893133	0.000370738	10.3699	0.019519	0.0386135	0.000395564	-0.00167105	0.004661	-0.000557885	0.00209758	0.00891805	0.0108112
78	0.089601	0.000237144	10.3862	0.0125633	0.0383658	0.000286471	0.00154452	0.003407	0.00101177	0.00152632	0.00244584	0.00812135
79	0.0896868	0.00034255	10.4142	0.0186987	0.0389479	0.000353931	0.00250409	0.00438759	0.00370728	0.00202878	0.0176547	0.00978538
80	0.0896776	0.000223925	10.3907	0.0103539	0.0381387	0.000213166	0.0024008	0.00329454	0.00144856	0.00136385	-0.00348682	0.00639017
81	0.0895929	0.000215461	10.3969	0.0118066	0.0382484	0.000241476	0.00145444	0.00322191	0.0020421	0.00146974	-0.000621565	0.00704825
82	0.090038	0.000417773	10.4042	0.0533536	0.0378813	0.000246269	0.00642925	0.0051413	0.00275068	0.00522574	-0.0102126	0.00714741
83	0.090313	0.000670653	10.4064	0.0655618	0.0383819	0.000242223	0.00950321	0.00780071	0.00295839	0.00638701	0.00286747	0.00707061
84	0.0884489	0.00160025	10.2487	0.191723	0.0385029	0.00025002	-0.0113334	0.0180117	-0.0122445	0.0185008	0.00602758	0.00725787
85	0.0896269	0.000216339	10.3621	0.0118184	0.0382429	0.000218554	0.00183453	0.00322978	-0.00130887	0.00146866	-0.000765833	0.00651737
86	0.0898832	0.000450013	10.3518	0.0214784	0.038394	0.000352686	0.00469927	0.00546925	-0.00230083	0.00226782	0.00318255	0.00973983
87	0.0896997	0.000254324	10.3492	0.0156362	0.0380754	0.00023795	0.00264826	0.00355988	-0.00255752	0.00176874	-0.00514251	0.0069595
88	0.0895555	0.000217643	10.3717	0.014252	0.0384326	0.000233257	0.0010359	0.00323958	-0.000383674	0.00165767	0.00419084	0.00686363
89	0.0887496	0.000271083	10.3434	0.014843	0.0387171	0.000263734	-0.00797188	0.00369813	-0.00310898	0.0017038	0.0116262	0.00758936
90	0.089215	0.00038811	10.3185	0.0156117	0.0384711	0.000302152	-0.00276929	0.00483343	-0.00550871	0.0017653	0.00519774	0.00850368
91	0.0884229	0.000434943	10.3192	0.0220533	0.0378694	0.00037141	-0.0116235	0.00530074	-0.00544403	0.00231734	-0.0105234	0.0101907
92	0.0898004	0.000358401	10.3265	0.0194312	0.037885	0.000347222	0.0037738	0.00454432	-0.00474543	0.00208826	-0.0101164	0.00959121
93	0.089367	0.000212561	10.3538	0.0116251	0.0378227	0.0002105	-0.00107091	0.00319413	-0.00211262	0.00145378	-0.0117445	0.00631676
94	0.0896159	0.000257994	10.3812	0.0116371	0.0381573	0.000234594	0.00171116	0.00359153	0.000530264	0.00145623	-0.0030018	0.00688435
95	0.0892972	0.000235051	10.344	0.0128394	0.0379045	0.000240872	-0.00185039	0.00338425	-0.00305921	0.00154525	-0.00960799	0.00702157
96	0.0897177	0.000222323	10.376	0.0121495	0.0383559	0.000263387	0.00284906	0.00328158	2.70125e-05	0.00149431	0.00218843	0.00756872
97	0.0894898	0.000254966	10.3678	0.0139353	0.0384642	0.000275806	0.000302175	0.0035626	-0.00076198	0.00163228	0.00501726	0.0078685
98	0.0899782	0.00027443	10.3825	0.0138004	0.0384028	0.000279805	0.00576069	0.00374561	0.000658414	0.00162235	0.00341295	0.0079623
99	0.0894973	0.000233554	10.3581	0.0127584	0.0383496	0.000252513	0.000385944	0.00337431	-0.00169632	0.00153977	0.00202384	0.00731112
100	0.0894114	0.000224689	10.3629	0.012294	0.0386523	0.000383319	-0.000574507	0.00329691	-0.00123284	0.00150453	0.00993171	0.0105067
101	0.0896159	0.000223105	10.3877	0.0122122	0.0380166	0.000274225	0.00171194	0.00328662	0.00115449	0.0014997	-0.00667658	0.00781593
102	0.0894791	0.000233329	10.3571	0.0120964	0.0383754	0.00025138	0.000182442	0.00337209	-0.00178978	0.00148926	0.00269592	0.00728533
103	0.0893985	0.000233287	10.3679	0.0118155	0.0377503	0.000310612	-0.000718713	0.0033705	-0.000754416	0.00146876	-0.013635	0.00868797
104	0.0898239	0.000215564	10.3688	0.011768	0.0386436	0.000286625	0.00403676	0.00322643	-0.000664912	0.00146527	0.00970573	0.00813392
105	0.0895571	0.000333187	10.3476	0.0181322	0.0378869	0.000388409	0.00105432	0.00429502	-0.00271145	0.00197765	-0.0100658	0.010615
106	0.089615	0.00027785	10.3737	0.0163293	0.0384104	0.00028537	0.00170147	0.00377205	-0.000191903	0.00182711	0.00361063	0.00809628
107	0.089465	0.000244429	10.3717	0.0133596	0.0381846	0.00023124	2.42005e-05	0.00346873	-0.000385067	0.00158714	-0.00228853	0.00680746
108	0.0894983	0.000241457	10.374	0.0156046	0.0383663	0.000212948	0.000397385	0.00344312	-0.000165077	0.00176731	0.00245884	0.0063944
109	0.0900382	0.000239201	10.3704	0.0130249	0.0385521	0.000239483	0.006432	0.00343147	-0.000509917	0.00156101	0.00731465	0.0070129
110	0.0896693	0.000294033	10.3604	0.0160063	0.0377475	0.000268354	0.00230838	0.00392304	-0.00147151	0.00179974	-0.0137086	0.00766657
111	0.0899601	0.000242068	10.3739	0.0133745	0.0384303	0.000232855	0.00555934	0.00345533	-0.000177551	0.00158841	0.00413292	0.00685421
112	0.0894216	0.000371004	10.33	0.0178511	0.0382366	0.000300214	-0.000460808	0.00466483	-0.00440176	0.00195301	-0.0009292	0.00844951
113	0.0897494	0.000328504	10.3792	0.0129328	0.0383142	0.000247698	0.00320335	0.00425202	0.000339852	0.00155435	0.00109901	0.00719652
114	0.0895794	0.000237889	10.3925	0.0130178	0.0378381	0.000242612	0.00130335	0.00341316	0.00161473	0.00156163	-0.0113423	0.00705993
115	0.0889076	0.000379768	10.3434	0.0162963	0.0383774	0.000343082	-0.00620535	0.00474662	-0.00311509	0.00182299	0.00274819	0.00950229
116	0.0899796	0.000252019	10.38	0.0132726	0.038088	0.000885819	0.00577637	0.00354339	0.000416712	0.00158078	-0.00481265	0.0233557
117	0.0893809	0.000281964	10.3865	0.0150108	0.0377607	0.000590218	-0.000915175	0.00380686	0.00103776	0.00171948	-0.0133644	0.0157304
118	0.0889579	0.000362573	10.3426	0.0189723	0.0387056	0.000509762	-0.00564311	0.0045761	-0.00319484	0.00204935	0.0113261	0.0136935
WM, SEM	0.0895251	2.90349e-05	10.3743	0.0020289	0.0383195	2.54739e-05	0.000654101	0.000330258	-0.000199556	0.000196541	0.00117695	0.000655706
Neff, 95% SEM	96.1504	6.16119e-05	94.6607	0.00570071	93.1926	4.93475e-05	106.344	0.000654769	104.996	0.000452463	101.285	0.00130074
MSWD, MSWD_unc	1.14255	0.144981	2.00237	0.146129	0.951408	0.147288	0.75361	0.137788	1.34771	0.138678	0.756006	0.14122
Format	Weighted Mean (WM)	Standard Error of the Weighted Mean (SEM)
	Effective number of degrees of freedom (Neff)	Expanded 95% uncertainty on SEM
	Mean Square of the Weighted Deviates (MSWD)	Uncertainty on MSWD (Based on effective number of degrees of freedom)
	Weighted standard deviation = SEM*sqrt(Neff)

## Sheet: Figure 6
Figure 6
Not Hydride Corrected			*U-235 magnetic field slightly misaligned due to setup file error for particles 1 through 7. 235U/238U ratio omitted for these particles.								*not corrected for 241Am isobar				ion ratio		ion ratio
Particle	234U/238U	+/- 1σ	235U/238U	+/- 1σ	236U/238U	+/- 1σ	236U/235U	+/- 1σ	240Pu/239Pu	+/- 1σ	241Pu/239Pu	+/- 1σ	242Pu/239Pu	+/- 1σ	238U+/239Pu+	+/- 1σ	(235U + 238U)+/(239Pu + 240Pu)+	+/- 1σ
1	0.00061443	6.4522e-06			3.32105e-05	1.50362e-06	0.000639556	2.89687e-05	0.281217	0.00114245	0.00458017	0.000128348	0.0087301	0.000178176	51.2428	0.103154	42.0723	0.0751658
2	0.000634623	1.96365e-05			4.38817e-05	5.37691e-06	0.000836209	0.000102512	0.274243	0.00338299	0.00415932	0.00037375	0.0087354	0.000539428	52.0055	0.311528	42.9546	0.228847
3	0.000613911	6.42063e-06			3.36728e-05	1.50321e-06	0.000650708	2.90613e-05	0.27975	0.00113354	0.0045082	0.000126637	0.00889608	0.00017854	52.048	0.104266	42.775	0.0760584
4	0.000613759	4.91922e-06			3.1417e-05	1.11653e-06	0.000608009	2.16173e-05	0.280011	0.000871145	0.00448981	9.70304e-05	0.00873988	0.000136147	51.4983	0.0798876	42.3116	0.058292
5	0.000611785	5.24591e-06			3.46485e-05	1.24893e-06	0.000666841	2.4048e-05	0.281243	0.000927116	0.00438359	0.000101752	0.00846267	0.000142033	51.3217	0.0843877	42.1374	0.0614931
6	0.000617228	4.18684e-06			3.36558e-05	9.76264e-07	0.000654593	1.8997e-05	0.28062	0.000739698	0.00478293	8.47424e-05	0.00870146	0.000114777	52.0071	0.0686046	42.6989	0.0499974
7	0.000620817	4.89903e-06			3.32316e-05	1.13538e-06	0.000641268	2.19191e-05	0.280864	0.000855369	0.00450945	9.52668e-05	0.00883086	0.000133984	50.7842	0.0769601	41.7031	0.0560968
8	0.000629284	4.65596e-06	0.052338	5.98655e-05	3.84845e-05	1.15178e-06	0.000735307	2.2018e-05	0.280817	0.000815309	0.0046851	9.24926e-05	0.00859024	0.000125809	52.0159	0.0752576	42.737	0.054877
9	0.000608094	6.42355e-06	0.0522064	8.07759e-05	3.50084e-05	1.55316e-06	0.000670576	2.97634e-05	0.280259	0.00114744	0.00478019	0.000131818	0.0086407	0.000178061	52.4899	0.106116	43.1399	0.0773977
10	0.000625386	4.16412e-06	0.0520882	5.40583e-05	3.48974e-05	9.82177e-07	0.000669967	1.88651e-05	0.279578	0.000730412	0.00452683	8.16255e-05	0.00879076	0.000114224	52.2934	0.0681153	42.9964	0.0497275
11	0.00061791	1.05139e-05	0.0522069	0.000128667	3.27056e-05	2.47528e-06	0.000626461	4.74314e-05	0.277208	0.00184946	0.00460452	0.000211272	0.00878749	0.000292295	52.1687	0.170402	42.9783	0.124725
12	0.000619559	1.0983e-05	0.0524103	0.00013532	4.70967e-05	3.05976e-06	0.000898616	5.84145e-05	0.279356	0.00189872	0.00488419	0.000221412	0.0081996	0.000289328	50.4919	0.168955	41.5351	0.123434
13	0.000616984	4.80309e-06	0.0522004	6.15693e-05	2.90772e-05	1.04915e-06	0.000557031	2.01061e-05	0.281621	0.000846923	0.00462585	9.53838e-05	0.00866136	0.000131053	51.4764	0.0770857	42.2617	0.056149
14	0.000610488	6.82682e-06	0.0521912	8.61986e-05	3.03939e-05	1.5385e-06	0.000582357	2.94894e-05	0.282556	0.00122263	0.00457585	0.0001373	0.00894265	0.000192477	52.0701	0.111683	42.7176	0.0812622
15	0.000613602	6.2235e-06	0.0521729	7.86094e-05	3.00628e-05	1.3951e-06	0.000576215	2.675e-05	0.278964	0.00110061	0.00443576	0.000122272	0.00895533	0.000174573	51.9097	0.101142	42.7049	0.0738877
16	0.000618026	4.94609e-06	0.0521716	6.40311e-05	2.89543e-05	1.07963e-06	0.000554981	2.07017e-05	0.281169	0.000865962	0.00459889	9.74672e-05	0.00912909	0.000137827	50.9496	0.07829	41.8428	0.0570688
17	0.000627877	6.85016e-06	0.0522091	8.5019e-05	4.2423e-05	1.80286e-06	0.000812559	3.45498e-05	0.277529	0.00118428	0.0044036	0.000132187	0.00851611	0.000183717	51.456	0.10822	42.3806	0.0791811
WM, SEM	0.00061827	1.7106e-06	0.0522011	3.09557e-05	3.33171e-05	1.00746e-06	0.000640859	1.92462e-05	0.280387	0.000336917	0.0045756	3.61179e-05	0.00874022	5.16201e-05	51.6579	0.146667	42.4429	0.123901
Neff, 95% SEM	13.4583	4.43853e-06	8.03671	0.000100181	13.1766	5.86387e-06	13.2103	0.000112555	13.4427	0.000782682	13.4515	9.79375e-05	13.4085	0.00013664	13.5329	2.06456	13.5251	2.02256
MSWD, MSWD_unc	1.44252	0.40067	1.96955	0.533127	7.25862	0.405277	7.32803	0.404718	1.1563	0.400919	1.57543	0.400778	1.50128	0.401472	42.4553	0.399475	57.0953	0.399599
Hydride Corrected v.1			*U-235 magnetic field slightly misaligned due to setup file error for particles 1 through 7. 235U/238U ratio omitted for these particles.								*not corrected for 241Am isobar				ion ratio		ion ratio
Particle	234U/238U	+/- 1σ	235U/238U	+/- 1σ	236U/238U	+/- 1σ	236U/235U	+/- 1σ	240Pu/239Pu	+/- 1σ	241Pu/239Pu	+/- 1σ	242Pu/239Pu	+/- 1σ	238U+/239Pu+	+/- 1σ	(235U + 238U)+/(239Pu + 240Pu)+	+/- 1σ
1	0.00061443	6.4522e-06			2.61196e-05	1.50363e-06	0.000503002	2.89692e-05	0.285069	0.00116236	0.00464508	0.000130176	0.00885382	0.000180724	51.969	0.106104	42.5406	0.0768467
2	0.000634623	1.96365e-05			2.99065e-05	5.37726e-06	0.000569897	0.000102518	0.281759	0.00350091	0.00427738	0.000384404	0.00898334	0.000554878	53.4816	0.329474	43.9147	0.239163
3	0.000613911	6.42063e-06			2.81363e-05	1.50322e-06	0.000543719	2.90619e-05	0.282789	0.00114917	0.00455885	0.000128067	0.00899603	0.000180565	52.6327	0.106623	43.1532	0.0774056
4	0.000613759	4.91922e-06			2.32274e-05	1.11654e-06	0.000449516	2.16178e-05	0.284488	0.000888885	0.00456411	9.86439e-05	0.00888452	0.00013842	52.3506	0.0825606	42.8619	0.0598185
5	0.000611785	5.24591e-06			2.58282e-05	1.24898e-06	0.000497085	2.40494e-05	0.286059	0.000947329	0.00446118	0.000103561	0.00861246	0.00014457	52.2301	0.0874087	42.7227	0.0632132
6	0.000617228	4.18684e-06			2.87283e-05	9.76261e-07	0.000558756	1.89973e-05	0.283336	0.000748816	0.00483088	8.55962e-05	0.00878869	0.000115939	52.5285	0.06999	43.0356	0.0507889
7	0.000620817	4.89903e-06			2.30464e-05	1.13545e-06	0.000444726	2.19205e-05	0.286386	0.000876806	0.00460117	9.72139e-05	0.00901048	0.000136734	51.8172	0.0801339	42.3686	0.0579039
8	0.000629284	4.65596e-06	0.052338	5.98655e-05	2.28404e-05	1.15197e-06	0.000436401	2.2021e-05	0.289535	0.000847662	0.00483545	9.5476e-05	0.00886591	0.000129884	53.6851	0.0801771	43.8103	0.0576676
9	0.000608094	6.42355e-06	0.0522064	8.07759e-05	2.89786e-05	1.55317e-06	0.000555076	2.97641e-05	0.283582	0.00116471	0.00483876	0.000133442	0.00874658	0.000180263	53.1331	0.108736	43.5554	0.0788936
10	0.000625386	4.16412e-06	0.0520882	5.40583e-05	3.07712e-05	9.82171e-07	0.000590751	1.88653e-05	0.281837	0.000737914	0.0045647	8.23115e-05	0.00886429	0.000115189	52.7308	0.0692623	43.2796	0.0503848
11	0.00061791	1.05139e-05	0.0522069	0.000128667	1.63408e-05	2.47569e-06	0.000313001	4.74365e-05	0.286273	0.00192655	0.00476025	0.000218453	0.0090847	0.000302274	53.9331	0.182137	44.1188	0.131419
12	0.000619559	1.0983e-05	0.0524103	0.00013532	2.32552e-05	3.06051e-06	0.000443714	5.84243e-05	0.292204	0.00201055	0.0051165	0.000232	0.0085896	0.000303211	52.8934	0.185438	43.078	0.132763
13	0.000616984	4.80309e-06	0.0522004	6.15693e-05	2.04747e-05	1.04919e-06	0.000392232	2.01071e-05	0.286303	0.000864876	0.00470547	9.70337e-05	0.00881044	0.00013333	52.3624	0.0797675	42.8326	0.0576752
14	0.000610488	6.82682e-06	0.0521912	8.61986e-05	1.80455e-05	1.53864e-06	0.000345758	2.94914e-05	0.289471	0.00126075	0.0046915	0.000140787	0.00916868	0.000197388	53.3862	0.117409	43.5625	0.0845042
15	0.000613602	6.2235e-06	0.0521729	7.86094e-05	1.85455e-05	1.39521e-06	0.000355463	2.67518e-05	0.285279	0.00113237	0.00453971	0.000125151	0.0091652	0.000178703	53.1262	0.105946	43.4909	0.0766297
16	0.000618026	4.94609e-06	0.0521716	6.40311e-05	2.20903e-05	1.07965e-06	0.000423416	2.07025e-05	0.284855	0.000880409	0.00466126	9.87953e-05	0.00925288	0.000139714	51.6405	0.0804355	42.2886	0.0582931
17	0.000627877	6.85016e-06	0.0522091	8.5019e-05	2.6704e-05	1.8031e-06	0.000511481	3.45538e-05	0.28611	0.00123108	0.00454468	0.000136442	0.00878895	0.000189657	53.1046	0.115276	43.4466	0.0832077
WM, SEM	0.00061827	1.7106e-06	0.0522011	3.09557e-05	2.45479e-05	1.12865e-06	0.000471983	2.19788e-05	0.28527	0.000670076	0.0046581	3.79824e-05	0.00889885	4.84574e-05	52.5891	0.170064	43.0448	0.135174
Neff, 95% SEM	13.4583	4.43853e-06	8.03671	0.000100181	13.1761	8.53508e-06	13.21	0.00016874	13.3418	0.00389098	13.3712	0.000104365	13.3283	0.000121014	13.371	2.56594	13.4001	2.2535
MSWD, MSWD_unc	1.44252	0.40067	1.96955	0.533127	12.253	0.405285	12.6291	0.404722	7.22462	0.402555	1.61767	0.402076	1.33628	0.402776	48.7766	0.40208	59.5486	0.401608
Hydride Corrected v.2			*U-235 magnetic field slightly misaligned due to setup file error for particles 1 through 7. 235U/238U ratio omitted for these particles.								*not corrected for 241Am isobar				ion ratio		ion ratio
Particle	234U/238U	+/- 1σ	235U/238U	+/- 1σ	236U/238U	+/- 1σ	236U/235U	+/- 1σ	240Pu/239Pu	+/- 1σ	241Pu/239Pu	+/- 1σ	242Pu/239Pu	+/- 1σ	238U+/239Pu+	+/- 1σ	(235U + 238U)+/(239Pu + 240Pu)+	+/- 1σ
1	0.00061443	6.4522e-06			2.35094e-05	1.50365e-06	0.000452735	2.89692e-05	0.286516	0.00116987	0.00466948	0.000130863	0.00890032	0.000181681	52.2419	0.107221	42.7159	0.0774795
2	0.000634623	1.96365e-05			3.38885e-05	5.37708e-06	0.000645778	0.000102516	0.279566	0.00346635	0.00424295	0.000381297	0.00891105	0.000550372	53.0511	0.324188	43.636	0.236144
3	0.000613911	6.42063e-06			2.36865e-05	1.5033e-06	0.000457729	2.9063e-05	0.285296	0.00116216	0.00460068	0.000129248	0.00907858	0.000182237	53.1157	0.108588	43.4642	0.0785212
4	0.000613759	4.91922e-06			2.26409e-05	1.11655e-06	0.000438165	2.1618e-05	0.28481	0.000890164	0.00456944	9.87597e-05	0.0088949	0.000138584	52.4117	0.0827567	42.9013	0.0599301
5	0.000611785	5.24591e-06			2.21541e-05	1.24902e-06	0.000426375	2.40497e-05	0.288119	0.000956037	0.00449438	0.000104336	0.00867656	0.000145655	52.6188	0.0887194	42.9718	0.0639537
6	0.000617228	4.18684e-06			2.17871e-05	9.76287e-07	0.000423751	1.89973e-05	0.287276	0.000762116	0.00490037	8.6834e-05	0.00891512	0.000117622	53.2841	0.0720183	43.5211	0.0519381
7	0.000620817	4.89903e-06			2.35795e-05	1.13544e-06	0.000455013	2.19204e-05	0.286087	0.000875638	0.0045962	9.71083e-05	0.00900074	0.000136585	51.7612	0.0799617	42.3327	0.0578066
8	0.000629284	4.65596e-06	0.052338	5.98655e-05	2.30868e-05	1.15194e-06	0.00044111	2.20205e-05	0.289392	0.00084713	0.00483301	9.54276e-05	0.00886144	0.000129818	53.658	0.0800987	43.7931	0.057624
9	0.000608094	6.42355e-06	0.0522064	8.07759e-05	2.58889e-05	1.5532e-06	0.000495895	2.97645e-05	0.285319	0.00117378	0.00486936	0.00013429	0.00880189	0.000181413	53.4691	0.110119	43.7716	0.0796788
10	0.000625386	4.16412e-06	0.0520882	5.40583e-05	2.28951e-05	9.82205e-07	0.000439545	1.88655e-05	0.286253	0.000752666	0.00463867	8.36519e-05	0.00900793	0.000117073	53.5853	0.0715267	43.83	0.0516717
11	0.00061791	1.05139e-05	0.0522069	0.000128667	2.32182e-05	2.47538e-06	0.000444733	4.74332e-05	0.282388	0.00189336	0.00469354	0.000215376	0.00895739	0.000297999	53.1773	0.177061	43.6323	0.128542
12	0.000619559	1.0983e-05	0.0524103	0.00013532	2.46934e-05	3.06095e-06	0.000471156	5.8434e-05	0.29124	0.0020021	0.00509909	0.000231206	0.00856038	0.00030217	52.7134	0.184174	42.9635	0.132056
13	0.000616984	4.80309e-06	0.0522004	6.15693e-05	2.23273e-05	1.04917e-06	0.000427722	2.01068e-05	0.285279	0.000860938	0.00468807	9.66731e-05	0.00877786	0.000132832	52.1688	0.0791786	42.7082	0.0573417
14	0.000610488	6.82682e-06	0.0521912	8.61986e-05	2.32701e-05	1.53852e-06	0.000445863	2.94901e-05	0.286502	0.00124432	0.00464187	0.000139291	0.00907167	0.00019528	52.8214	0.114934	43.201	0.0831094
15	0.000613602	6.2235e-06	0.0521729	7.86094e-05	2.26504e-05	1.39513e-06	0.000434141	2.67508e-05	0.282992	0.00112083	0.00450209	0.000124109	0.00908925	0.000177208	52.686	0.104194	43.2074	0.0756349
16	0.000618026	4.94609e-06	0.0521716	6.40311e-05	2.20875e-05	1.07965e-06	0.000423361	2.07023e-05	0.284854	0.000880413	0.00466128	9.87957e-05	0.00925292	0.000139714	51.6407	0.0804334	42.2888	0.0582916
17	0.000627877	6.85016e-06	0.0522091	8.5019e-05	2.55502e-05	1.80313e-06	0.000489381	3.45541e-05	0.286761	0.00123465	0.00455536	0.000136764	0.00880961	0.000190106	53.2294	0.115821	43.5267	0.083515
WM, SEM	0.00061827	1.7106e-06	0.0522011	3.09557e-05	2.29946e-05	3.42307e-07	0.000442317	6.37348e-06	0.286212	0.000499128	0.00467368	3.89793e-05	0.00892972	4.27999e-05	52.7606	0.189659	43.1545	0.14998
Neff, 95% SEM	13.4583	4.43853e-06	8.03671	0.000100181	13.1763	7.39509e-07	13.21	1.37691e-05	13.4537	0.00189195	13.4597	0.00011099	13.4201	9.5702e-05	13.5373	3.56127	13.5293	3.05043
MSWD, MSWD_unc	1.44252	0.40067	1.96955	0.533127	0.625874	0.405283	0.571679	0.404723	3.07851	0.400743	1.73717	0.400646	1.07128	0.401285	75.5448	0.399405	88.6335	0.399531
Format	Weighted Mean (WM)
	Effective number of degrees of freedom (Neff)
	Mean Square of the Weighted Deviates (MSWD)
	Weighted standard deviation = SEM*sqrt(Neff)

## Sheet: Figure 7
Figure 7
O- profiles (no hydride corrections)																									O3- profiles (no hydride corrections)
Cycle	235U	+-	238U	+-	239Pu	+-	240Pu	+-	242Pu	+-	235U/238U	+-	240Pu/239Pu	+-	242Pu/239Pu	+-	239Pu+/238U+	+-	(239Pu+240Pu)+/(235U+238U)+	+-	RSF_integrated	+-95%			Cycle	235U	+-	238U	+-	239Pu	+-	240Pu	+-	242Pu	+-	235U/238U	+-	240Pu/239Pu	+-	242Pu/239Pu	+-	239Pu+/238U+	+-	(239Pu+240Pu)+/(235U+238U)+	+-	RSF_integrated	+-95%
0	886.42	8.87599	16865.4	46.5934	579.5	6.9539	148.219	3.44627	4.28803	0.589006	0.0525586	0.000545948	0.255771	0.00669227	0.00739953	0.00102027	0.0343603	0.000423104	0.0409941	0.000450709	nan	nan			0	3097.51	18.2353	58875.9	118.199	1614.98	11.7352	446.231	6.09789	13.1667	1.04749	0.0526109	0.000327238	0.276307	0.00427644	0.00815282	0.000651304	0.0274303	0.000206788	0.0332597	0.00022284	nan	nan
1	987.022	9.40967	19246.2	50.9793	587.676	7.00329	161.424	3.59672	3.55987	0.536671	0.051284	0.000507431	0.274682	0.00694062	0.00605754	0.000916057	0.0305347	0.00037276	0.0370233	0.000400503	3.29383	2.21543			1	3855.54	20.9178	72649.3	140.948	1777.64	12.3293	479.281	6.32051	14.8333	1.11181	0.0530706	0.000305785	0.269616	0.00401733	0.00834441	0.000628112	0.0244688	0.000176224	0.0295003	0.000189251	2.6418	2.0828
2	1141.97	10.193	21922	55.8186	622.859	7.21215	166.787	3.65605	5.2589	0.652287	0.0520922	0.000483517	0.267776	0.00663838	0.00844316	0.0010518	0.0284125	0.000336851	0.0342372	0.000360562	3.14526	0.729595			2	4610.28	23.4813	86831.2	164.248	1990.37	13.0702	530.266	6.64955	16.1667	1.1607	0.0530947	0.000288472	0.266415	0.0037712	0.00812244	0.000585592	0.0229223	0.000156645	0.0275656	0.000167989	2.51993	0.611186
3	1246.57	10.6999	24463.1	60.3462	662.089	7.43841	179.912	3.79739	6.14887	0.705324	0.0509572	0.000455096	0.271734	0.00649735	0.00928707	0.0010704	0.0270649	0.00031131	0.0327504	0.000334095	3.03542	0.492782			3	5400.26	26.0841	102315	189.598	2220.61	13.8328	592.712	7.03195	20.9167	1.32025	0.0527807	0.000273057	0.266914	0.00357664	0.00941936	0.000597434	0.0217036	0.000141054	0.0261181	0.000151351	2.42192	0.412522
4	1410.33	11.4643	26929	64.69	694.63	7.62122	192.797	3.93124	5.2589	0.652287	0.0523722	0.000443925	0.277554	0.00642674	0.0075708	0.000942709	0.0257948	0.000289716	0.0313143	0.000311183	2.94125	0.403897			4	6239.91	28.785	118345	215.778	2502.84	14.7211	667.531	7.46481	21.25	1.33073	0.0527263	0.000261538	0.26671	0.00336994	0.00849038	0.000534029	0.0211486	0.000130231	0.0254474	0.000139747	2.35022	0.321019
5	1528.81	11.9985	29361.1	68.9351	741.128	7.87543	198.64	3.99045	5.66343	0.67691	0.0520693	0.000426546	0.268024	0.00609116	0.00764164	0.000916954	0.0252418	0.000274696	0.0304231	0.000294003	2.86427	0.349264			5	7125.38	31.5788	135279	243.386	2729.77	15.4038	740.109	7.86243	23.75	1.40683	0.0526718	0.000251936	0.271125	0.00326137	0.00870038	0.0005177	0.0201788	0.000119515	0.0243664	0.000128501	2.28288	0.277781
6	1649.41	12.5283	31751.2	73.0758	796.133	8.16645	209.684	4.10008	7.44337	0.776025	0.0519481	0.000412293	0.263379	0.0058156	0.0093494	0.000979449	0.0250741	0.000263596	0.0301138	0.000281633	2.80599	0.305055			6	7957.33	34.1648	152168	270.887	2982.25	16.135	816.922	8.2629	25.5834	1.46012	0.0522931	0.000243055	0.273928	0.00314217	0.00857855	0.0004918	0.0195984	0.000111627	0.0237263	0.000120221	2.22576	0.247465
7	1764.39	13.0219	34205.5	77.3008	822.315	8.30158	232.334	4.31625	6.06796	0.700668	0.051582	0.000398142	0.282537	0.00597383	0.00737913	0.000855319	0.0240404	0.000248704	0.0293203	0.000267857	2.75221	0.27579			7	8816.33	36.804	166936	294.915	3197.67	16.7381	864.672	8.50257	28.4167	1.53886	0.0528125	0.000239397	0.270406	0.00301225	0.00888669	0.000483485	0.0191551	0.000105823	0.023114	0.000113746	2.17577	0.225418
8	1892.34	13.5595	36812.9	81.764	866.914	8.52711	236.416	4.35407	7.92881	0.800931	0.0514043	0.000385625	0.272709	0.00569392	0.00914601	0.000928257	0.0235492	0.000237466	0.028506	0.000254788	2.70084	0.255784			8	9359.52	38.4596	177617	312.282	3380.68	17.237	922.968	8.78655	28.1667	1.53207	0.052695	0.000235519	0.273012	0.00294834	0.00833167	0.000455171	0.0190336	0.000102654	0.0230171	0.000110486	2.13833	0.204117
9	2042.9	14.1782	39235	85.8904	922.416	8.80017	255.144	4.52359	7.92881	0.800931	0.0520683	0.000378916	0.276604	0.00556899	0.00859569	0.00087216	0.0235101	0.000230123	0.0285276	0.000247145	2.66115	0.235052			9	9699.16	39.4903	184288	323.127	3436.99	17.3882	945.722	8.89501	29.0001	1.55457	0.0526304	0.000233311	0.27516	0.00293866	0.00843764	0.000454316	0.0186501	9.99e-05	0.0225928	0.000107585	2.10541	0.187805
10	2141.39	14.5756	41694.4	90.0636	970.733	9.03158	268.909	4.64429	8.33334	0.821109	0.0513593	0.000366763	0.277017	0.00543436	0.00858458	0.000849627	0.0232821	0.000222375	0.0282792	0.000239036	2.62686	0.217242			10	9912.74	40.1367	189057	330.878	3498.1	17.5511	962.082	8.9722	27.7501	1.5207	0.0524325	0.000231283	0.27503	0.00291252	0.00793289	0.000436539	0.0185029	9.83e-05	0.0224164	0.000105946	2.07841	0.173583
11	2273.03	15.0987	44179.1	94.2648	1021.12	9.26713	281.475	4.75181	8.33334	0.821109	0.0514503	0.00035896	0.275654	0.00528337	0.00816102	0.000807533	0.0231131	0.000215482	0.0280416	0.000231485	2.5966	0.201918			11	10227.4	41.0868	192984	337.26	3589.32	17.7921	984.172	9.07541	29.7501	1.57454	0.0529957	0.000232175	0.274195	0.00287061	0.0082885	0.000440594	0.018599	9.78e-05	0.022506	0.000105243	2.05817	0.160059
12	2419.76	15.672	46672.1	98.4669	1044.16	9.37303	295.081	4.86557	8.41424	0.825085	0.0518459	0.000353156	0.282601	0.00530557	0.0080584	0.000793495	0.0223722	0.0002063	0.0272803	0.000222141	2.56437	0.191286			12	10313.5	41.3467	196755	343.388	3667.68	17.9971	1024.2	9.2596	32.9168	1.65623	0.0524181	0.000229192	0.279249	0.00287253	0.0089748	0.000453715	0.0186408	9.71e-05	0.0226586	0.000104814	2.04331	0.147495
13	2543.8	16.1493	49201.7	102.719	1102.22	9.63507	309.407	4.98258	8.09062	0.809062	0.0517015	0.000345519	0.280712	0.00514355	0.00734027	0.000736827	0.0224021	0.000201335	0.0272803	0.000216674	2.53744	0.180532			13	10530.8	42.0011	200428	349.356	3751.03	18.2131	1027.02	9.27246	34.1668	1.68738	0.0525417	0.000228695	0.273798	0.00280679	0.00910864	0.000452014	0.0187151	9.65e-05	0.0226492	0.000103985	2.03105	0.13657
14	2671.69	16.635	51473.2	106.528	1155.25	9.86874	326.294	5.11711	8.89968	0.848552	0.0519044	0.000340563	0.282445	0.00504396	0.00770369	0.00073746	0.0224437	0.000197272	0.0273625	0.000212417	2.51548	0.169858			14	10751	42.6631	204182	355.454	3796.06	18.329	1050.77	9.37995	31.0834	1.60944	0.0526543	0.000228169	0.276807	0.00280928	0.00818834	0.000425817	0.0185915	9.54e-05	0.0225504	0.000102897	2.02005	0.127252
15	2774.68	17.0219	53896	110.583	1191.51	10.0256	330.536	5.15035	10.4369	0.918919	0.0514822	0.000333025	0.27741	0.00491252	0.0087594	0.000774737	0.0221076	0.000191469	0.0268577	0.000205836	2.4927	0.161525			15	10824.8	42.8846	207099	360.193	3900.88	18.5967	1079.17	9.50694	31.5834	1.62233	0.0522687	0.000226149	0.276649	0.0027711	0.00809649	0.000417677	0.0188358	9.56e-05	0.0228523	0.000103113	2.01294	0.118392
16	2883.47	17.4266	55808.8	113.779	1224.38	10.1659	344.942	5.26171	12.7832	1.01698	0.051667	0.000329545	0.281728	0.00489282	0.0104405	0.000835115	0.0219389	0.000187568	0.0267382	0.000201959	2.47235	0.1538			16	10997.7	43.4034	209699	364.417	3992.51	18.8282	1108.9	9.63814	35.7501	1.72603	0.0524451	0.000226157	0.277746	0.0027465	0.00895428	0.000434375	0.0190392	9.57e-05	0.023115	0.000103261	2.00863	0.110254
17	2977.49	17.7734	57412.5	116.455	1247.67	10.2643	345.502	5.26599	11.5696	0.967499	0.0518614	0.000326959	0.276917	0.00479622	0.00927292	0.000779185	0.0217318	0.000184136	0.0263815	0.000197841	2.45234	0.147369			17	11166.6	43.9095	212007	368.166	4059.52	18.9961	1137.39	9.76226	37.0834	1.75793	0.0526707	0.000226411	0.280178	0.00273895	0.00913493	0.000435143	0.019148	9.56e-05	0.0232864	0.000103224	2.00598	0.102959
18	3076.9	18.1373	59064.6	119.209	1299.63	10.4806	363.11	5.39891	12.1359	0.990896	0.0520938	0.000324576	0.279396	0.00472588	0.00933801	0.000766156	0.0220035	0.000182916	0.0267573	0.000196696	2.43754	0.140143			18	11266.5	44.2086	214003	371.407	4114.26	19.1325	1145.36	9.79672	34.4168	1.69354	0.0526463	0.000225884	0.278389	0.00271033	0.00836524	0.000413462	0.0192252	9.54e-05	0.0233482	0.000102993	2.00404	0.0965055
19	3143.91	18.3809	60659.2	121.864	1309.37	10.5207	361.429	5.38636	10.356	0.91535	0.051829	0.00032041	0.276032	0.00467349	0.00790912	0.000701957	0.0215858	0.000178779	0.0261869	0.00019203	2.42095	0.134638			19	11283.3	44.2589	215739	374.226	4138.56	19.1928	1138.64	9.76765	36.8334	1.75199	0.0523007	0.000224315	0.275129	0.00268297	0.00890007	0.000425342	0.0191832	9.5e-05	0.0232453	0.000102407	2.00177	0.0908788
20	3192.23	18.5559	61877.8	123.891	1318.62	10.5587	367.032	5.42807	11.3269	0.957296	0.0515892	0.00031717	0.278344	0.00468111	0.00858991	0.000729232	0.0213101	0.000175891	0.0259053	0.000189147	2.40473	0.129901			20	11409.2	44.6357	216715	375.813	4194.78	19.3317	1160.64	9.86245	38.5834	1.79313	0.052646	0.000225291	0.276687	0.00267464	0.00919796	0.000429563	0.0193562	9.53e-05	0.0234759	0.000102796	2.00098	0.0857405
21	3238.1	18.7214	62885.2	125.566	1345.55	10.6685	384.079	5.55309	11.9741	0.984267	0.0514922	0.000314962	0.285444	0.00470683	0.00889904	0.000734892	0.021397	0.000174948	0.0261577	0.000188697	2.39191	0.124748			21	11399	44.6051	217559	377.183	4179.52	19.2941	1177.17	9.93307	37.8334	1.77562	0.0523949	0.000224247	0.281651	0.00270901	0.00905209	0.000426887	0.019211	9.47e-05	0.023396	0.000102419	1.99988	0.0811896
22	3287.72	18.8999	63817.2	127.115	1345.14	10.6668	381.518	5.53449	12.2168	0.994193	0.0515177	0.000313431	0.283627	0.00468905	0.00908221	0.000742601	0.021078	0.000172339	0.0257307	0.000185736	2.37824	0.120602			22	11448.2	44.7522	218437	378.608	4265.19	19.5047	1186.06	9.97084	36.4168	1.74205	0.0524096	0.000224111	0.278078	0.00266121	0.00853813	0.000410297	0.019526	9.55e-05	0.0237129	0.000103085	2.00038	0.0770121
23	3347.95	19.1157	64980.5	129.047	1336.96	10.6336	379.437	5.51933	13.1877	1.03294	0.0515224	0.000311463	0.283806	0.00470508	0.00986394	0.000776577	0.0205748	0.000168667	0.0251198	0.00018178	2.36283	0.117669			23	11453.6	44.7685	218778	379.162	4259.97	19.4919	1179.25	9.94191	36.0001	1.73206	0.0523529	0.000223844	0.27682	0.00265536	0.00845079	0.000408424	0.0194717	9.53e-05	0.023625	0.000102797	2.00044	0.0732654
24	3442.88	19.4541	66330.6	131.288	1367.19	10.756	369.673	5.44763	12.3787	1.00076	0.0519048	0.000310763	0.270388	0.0045168	0.00905407	0.000735436	0.0206118	0.000167211	0.0248929	0.00017917	2.3478	0.115038			24	11510.8	44.9395	219302	380.014	4285.68	19.5548	1176.84	9.93165	34.4168	1.69354	0.0524883	0.000224198	0.274598	0.00263443	0.00803064	0.000396858	0.0195423	9.54e-05	0.0236664	0.000102804	2.00067	0.0698663
25	3512.58	19.7013	67827.5	133.771	1374.87	10.7869	383.039	5.54554	13.9159	1.06108	0.051787	0.000307895	0.278599	0.00458768	0.0101216	0.000775837	0.0202702	0.000163982	0.0246413	0.000176313	2.33295	0.112721			25	11563.7	45.0974	219941	381.052	4293.64	19.5743	1215.29	10.0941	39.5001	1.81431	0.0525761	0.000224365	0.283044	0.00268179	0.00919968	0.000424633	0.0195218	9.52e-05	0.0237961	0.000102985	2.0014	0.0667637
26	3616.24	20.0669	69303.5	136.218	1393.05	10.8597	395.845	5.63778	12.2168	0.994193	0.0521798	0.000307179	0.284158	0.00461368	0.00876988	0.00071695	0.0201007	0.000161602	0.0245323	0.000174076	2.31892	0.11044			26	11527.1	44.988	220218	381.5	4322.34	19.6442	1207.9	10.0631	34.6668	1.69968	0.052344	0.00022351	0.279455	0.00265206	0.00802038	0.000394918	0.0196276	9.55e-05	0.0238635	0.00010313	2.00232	0.063934
27	3702.11	20.3681	71262.5	139.463	1424.52	10.9847	387.201	5.57569	12.2978	0.99748	0.0519503	0.000303362	0.271812	0.00443997	0.00863293	0.000703381	0.0199897	0.000159031	0.0241676	0.000170494	2.30437	0.108628			27	11564.1	45.0988	219980	381.114	4296.62	19.5816	1201.75	10.0372	39.6668	1.81813	0.0525692	0.000224333	0.279697	0.00266122	0.00923208	0.000425239	0.0195319	9.52e-05	0.0237466	0.000102861	2.00274	0.0613464
28	3791.33	20.6795	73215.4	142.696	1446.24	11.0703	400.887	5.67369	12.5405	1.00727	0.0517832	0.000299937	0.277193	0.00446009	0.00867109	0.000699635	0.0197532	0.000156026	0.0239865	0.000167665	2.29015	0.106926			28	11540	45.0267	220043	381.218	4357.08	19.7287	1217.2	10.1021	36.0001	1.73206	0.0524442	0.000223891	0.279361	0.00264117	0.00826243	0.000399284	0.019801	9.6e-05	0.0240703	0.000103693	2.00426	0.0589895
29	3959.97	21.2641	77129.4	149.167	1521.32	11.3615	423.137	5.82956	13.5113	1.04554	0.0513419	0.00029303	0.278137	0.00435868	0.00888132	0.000690451	0.0197243	0.000152163	0.0239792	0.00016366	2.27667	0.105075			29	11484.1	44.8597	219211	379.865	4330.21	19.6634	1206.65	10.0579	39.0001	1.80279	0.0523885	0.000223875	0.278659	0.00264504	0.00900651	0.000418331	0.0197537	9.6e-05	0.0240008	0.00010368	2.00542	0.0568089
30	4040.37	21.5411	77877.4	150.403	1482.09	11.2102	416.334	5.78234	14.1586	1.07029	0.0518811	0.000294191	0.28091	0.00444253	0.00955314	0.000725756	0.019031	0.000148564	0.0231747	0.000159866	2.261	0.104299			30	11436.6	44.7178	218937	379.421	4312.22	19.6196	1204.33	10.0481	38.3334	1.78731	0.0522371	0.000223412	0.279282	0.00265408	0.0088895	0.000416445	0.0196961	9.59e-05	0.023946	0.000103597	2.00632	0.0547882
31	3355.79	19.1437	64796.8	128.742	1155.91	9.87161	326.934	5.12214	11.4078	0.960709	0.0517895	0.000312849	0.282837	0.00504684	0.00986909	0.000835391	0.017839	0.000156416	0.0217577	0.000168391	2.24432	0.105078			31	11420.2	44.6684	218492	378.699	4305.58	19.6034	1203.66	10.0453	39.4168	1.81239	0.052268	0.000223612	0.279558	0.0026577	0.00915481	0.000422998	0.0197059	9.6e-05	0.0239623	0.000103723	2.00719	0.0529172
32	2950.56	17.6744	57561.3	116.703	998.155	9.16049	277.153	4.7151	9.70875	0.886284	0.0512594	0.000324164	0.277665	0.00536731	0.00972669	0.000892398	0.0173407	0.00016298	0.0210753	0.000175153	2.2286	0.106067			32	11310	44.3388	217289	376.744	4276.72	19.5329	1199.43	10.0274	35.4168	1.71797	0.0520504	0.000223121	0.280455	0.00267173	0.00828129	0.000403479	0.0196822	9.62e-05	0.0239553	0.000103949	2.00798	0.0511811
33	2813.61	17.1672	54090.3	110.908	908.293	8.73145	257.144	4.54133	7.52428	0.780231	0.0520169	0.000334822	0.283107	0.00569256	0.00828397	0.000862692	0.0167922	0.000165055	0.0204808	0.00017761	2.2132	0.10722			33	11385.2	44.5639	216542	375.532	4295.13	19.5779	1185.39	9.96802	37.0834	1.75793	0.0525773	0.000225092	0.275985	0.00263979	0.00863383	0.000411171	0.0198351	9.67e-05	0.024045	0.000104318	2.00897	0.049573
34	2708.9	16.7752	52398.3	108.078	881.946	8.60187	255.144	4.52359	6.22978	0.709949	0.0516983	0.00033744	0.289296	0.00585398	0.00706367	0.000807923	0.0168316	0.000167794	0.0206342	0.000181054	2.19956	0.10774			34	11318.3	44.3637	216424	375.34	4271.91	19.5211	1206.15	10.0558	35.7501	1.72603	0.0522967	0.000224153	0.282345	0.00268433	0.00836864	0.000405849	0.0197386	9.65e-05	0.0240537	0.000104356	2.00992	0.0480714
35	2674.46	16.6455	51289.4	106.221	861.298	8.49902	239.617	4.38351	8.57606	0.832981	0.0521445	0.000342036	0.278205	0.00578261	0.00995713	0.000972101	0.0167929	0.000169317	0.020401	0.00018181	2.1864	0.108176			35	11272.5	44.2268	215449	373.756	4255.9	19.482	1180.24	9.94615	40.0001	1.82575	0.0523211	0.000224448	0.277319	0.00265955	0.00939873	0.000431145	0.0197536	9.67e-05	0.0239772	0.000104367	2.0106	0.0466614
36	2633.49	16.4906	50653.4	105.154	863.198	8.50853	242.338	4.40838	6.39159	0.71911	0.0519904	0.000342982	0.280745	0.00580859	0.00740455	0.000836268	0.0170413	0.00017166	0.0207469	0.000184546	2.1749	0.108031			36	11182	43.9556	214015	371.426	4247.2	19.4606	1175.09	9.92422	34.5834	1.69764	0.0522486	0.000224513	0.276675	0.0026584	0.00814265	0.000401445	0.0198453	9.72e-05	0.024078	0.000104924	2.0115	0.0453509
37	2567.22	16.2387	50275.5	104.521	846.927	8.42674	238.496	4.37323	6.87703	0.745919	0.0510632	0.000339993	0.281602	0.00587484	0.00811997	0.000884433	0.0168457	0.000171231	0.0205407	0.000184309	2.16363	0.107889			37	11122.4	43.7772	212415	368.829	4202.08	19.3497	1170.94	9.90651	35.5834	1.72201	0.0523615	0.000225256	0.278657	0.0026841	0.00846805	0.00041165	0.0197824	9.74e-05	0.0240363	0.000105128	2.01223	0.0441181
38	2571.14	16.2537	49821.4	103.759	824.214	8.3113	242.018	4.40546	7.68609	0.788577	0.0516072	0.000343487	0.293635	0.00611039	0.00932535	0.000961371	0.0165434	0.000170343	0.0203509	0.000184119	2.15262	0.10774			38	11052.7	43.5682	211054	366.618	4134.32	19.1823	1166.29	9.88664	38.1668	1.78342	0.0523688	0.000225586	0.282099	0.00272612	0.00923168	0.000433491	0.0195889	9.7e-05	0.0238651	0.000104948	2.0125	0.0429534
39	2564.12	16.2269	49550.5	103.305	829.583	8.33872	231.694	4.31028	5.98706	0.695982	0.0517477	0.000344795	0.279289	0.00590565	0.00721695	0.000842084	0.0167422	0.000171869	0.0203643	0.000184696	2.14223	0.107438			39	10955.2	43.2759	209183	363.578	4127.86	19.1663	1162.72	9.87135	36.2501	1.73806	0.0523713	0.000226021	0.281676	0.00272567	0.00878182	0.000423027	0.0197333	9.78e-05	0.024033	0.000105777	2.01315	0.0418647
40	2539.56	16.1331	49213.3	102.739	833.465	8.3585	231.694	4.31028	7.28156	0.767544	0.0516031	0.000345067	0.277989	0.00587509	0.00873649	0.000925066	0.0169358	0.000173483	0.0205816	0.000186365	2.13283	0.106865			40	10872	43.0264	207888	361.474	4083.07	19.0549	1154.08	9.83428	32.8334	1.65413	0.0522975	0.000226065	0.282651	0.0027461	0.00804135	0.000406853	0.0196407	9.78e-05	0.0239402	0.000105807	2.01355	0.0408335
41	2577.43	16.2776	49036.7	102.442	843.21	8.40795	231.934	4.31252	7.60518	0.784415	0.0525611	0.000349637	0.27506	0.00580342	0.00901932	0.000934609	0.0171955	0.000175185	0.0208304	0.000187803	2.12438	0.106053			41	10858.4	42.9855	206505	359.228	4046.25	18.963	1133.74	9.74642	33.6668	1.67499	0.0525819	0.000227368	0.280194	0.00274343	0.00832048	0.000415793	0.019594	9.79e-05	0.023831	0.000105806	2.01369	0.0398601
42	2548.05	16.1655	48665	101.818	819.507	8.28718	232.094	4.31401	7.8479	0.796834	0.0523589	0.000349777	0.283212	0.00599279	0.00957637	0.000977144	0.0168398	0.000173897	0.0205338	0.000187055	2.1158	0.105375			42	10753.9	42.6718	204583	356.105	4040.2	18.9478	1122.86	9.69912	35.0001	1.70783	0.0525652	0.000227765	0.277921	0.00273167	0.00866296	0.000424658	0.0197485	9.88e-05	0.0239767	0.000106612	2.01412	0.0389425
43	2557.84	16.2029	48677.4	101.839	832.391	8.35303	234.175	4.33334	7.52428	0.780231	0.0525468	0.000350548	0.281328	0.00592211	0.00903935	0.000941717	0.0171002	0.00017529	0.0208171	0.000188384	2.10812	0.104479			43	10588.2	42.1736	202928	353.418	3980.66	18.7983	1114.22	9.66142	37.2501	1.76187	0.052177	0.000226823	0.279909	0.0027637	0.00935778	0.00044481	0.019616	9.87e-05	0.0238617	0.000106682	2.0143	0.0380727
44	2512.55	16.0296	48301.3	101.207	830.739	8.34462	234.095	4.3326	7.28156	0.767544	0.0520181	0.000349307	0.281791	0.00593396	0.00876516	0.000928114	0.0171991	0.00017648	0.0209556	0.000189799	2.10107	0.10348			44	10550.3	42.0596	201263	350.712	3945.49	18.7097	1114.3	9.66178	33.5834	1.67291	0.0524203	0.00022807	0.282424	0.00279112	0.00851184	0.000425923	0.0196036	9.9e-05	0.023888	0.000107098	2.01452	0.0372485
45	2496.96	15.9698	48158	100.966	839.824	8.3908	237.056	4.35997	6.63431	0.732637	0.0518493	0.000348975	0.282268	0.00590808	0.00789964	0.000875933	0.0174389	0.00017803	0.0212591	0.00019154	2.09487	0.102317			45	10448.3	41.7526	200030	348.709	3951.46	18.7247	1109.32	9.63997	35.0001	1.70783	0.0522335	0.000227729	0.280737	0.00277874	0.0088575	0.000434236	0.0197544	9.97e-05	0.0240442	0.000107804	2.01503	0.0364716
46	2491.49	15.9488	47881.2	100.501	813.065	8.25407	232.894	4.32146	7.8479	0.796834	0.0520348	0.00035054	0.28644	0.00605849	0.00965225	0.000984924	0.0169809	0.000176033	0.0207644	0.000189656	2.08811	0.101395			46	10383	41.556	198452	346.144	3910.41	18.6209	1071.04	9.47072	37.0001	1.75595	0.0523201	0.000228422	0.273893	0.00275077	0.00946194	0.0004513	0.0197046	9.99e-05	0.0238536	0.00010767	2.01516	0.0357289
47	2497.86	15.9732	47640.8	100.097	816.286	8.27064	228.732	4.2826	6.71521	0.737091	0.052431	0.000352918	0.280211	0.00596538	0.00822655	0.00090682	0.0171342	0.000177297	0.0208426	0.000190477	2.08177	0.100424			47	10399.1	41.6044	197027	343.83	3860.99	18.4952	1071.95	9.47479	34.4168	1.69354	0.0527799	0.000230374	0.277636	0.0027912	0.00891397	0.000440703	0.0195962	9.99e-05	0.0237816	0.000107766	2.01515	0.035024
48	2451.34	15.7941	47565.8	99.9705	795.803	8.16473	237.296	4.36219	7.20065	0.763268	0.0515357	0.000349267	0.298184	0.00627742	0.00904828	0.000963599	0.0167306	0.000175216	0.0206549	0.000189737	2.07539	0.0995318			48	10287.1	41.267	195796	341.829	3814.63	18.3767	1073.94	9.48367	32.9168	1.65623	0.0525399	0.00022986	0.281533	0.00283201	0.00862908	0.000436163	0.0194827	9.98e-05	0.0237214	0.000107889	2.01504	0.0343554
49	2464.64	15.8454	47317.5	99.5529	814.056	8.25917	228.892	4.2841	6.63431	0.732637	0.0520873	0.00035235	0.281175	0.00598612	0.0081497	0.000903774	0.0172041	0.000178262	0.0209503	0.000191652	2.06975	0.0985044			49	10207.7	41.0277	194302	339.402	3833.12	18.424	1055.76	9.40235	33.4168	1.66876	0.0525353	0.000230233	0.27543	0.00278737	0.00871789	0.000437363	0.0197276	0.000100889	0.0239053	0.00010875	2.01524	0.0337139
50	2415.84	15.6568	47202.8	99.36	817.359	8.27616	234.895	4.34002	7.44337	0.776025	0.05118	0.000348749	0.287383	0.00605487	0.00910661	0.000953897	0.0173159	0.00017908	0.0212068	0.000193182	2.06473	0.0973815			50	10169.6	40.9126	192762	336.899	3781.21	18.2909	1045.54	9.35637	34.9168	1.7058	0.0527573	0.000231408	0.27651	0.00281281	0.00923428	0.000453331	0.019616	0.000100892	0.0237852	0.000108775	2.01524	0.0331035
51	2417.55	15.6634	47179.4	99.3206	816.451	8.27149	232.894	4.32146	6.5534	0.728156	0.0512417	0.000349083	0.285252	0.00603052	0.0080267	0.000895555	0.0173053	0.000179065	0.0211575	0.00019299	2.05982	0.0962914			51	10106.1	40.721	191727	335.218	3730.79	18.1609	1044.55	9.35188	32.5001	1.64571	0.0527109	0.000231524	0.279979	0.00285323	0.00871131	0.000443149	0.0194588	0.000100647	0.0236598	0.000108674	2.01503	0.0325263
52	2399.11	15.5919	46689.5	98.4962	805.301	8.214	228.812	4.28335	8.17153	0.813098	0.0513844	0.000351102	0.284133	0.00605725	0.0101472	0.00101497	0.017248	0.000179652	0.0210663	0.000193507	2.055	0.0952492			52	9938.86	40.2157	190295	332.889	3669.76	18.0025	1043.38	9.34663	31.7501	1.62661	0.0522288	0.000230238	0.284319	0.00290383	0.00865182	0.000445274	0.0192846	0.000100438	0.0235382	0.000108701	2.01464	0.0319849
53	2385.56	15.5393	46574.7	98.303	804.558	8.21016	233.374	4.32592	5.66343	0.67691	0.0512201	0.000350719	0.290065	0.00613769	0.00703919	0.000844405	0.0172746	0.00018001	0.0211995	0.00019438	2.05055	0.0941744			53	9948.25	40.2441	188662	330.235	3646.54	17.942	1030.68	9.28907	34.8334	1.70376	0.0527307	0.000232427	0.282645	0.00290226	0.00955246	0.000469585	0.0193285	0.00010094	0.0235498	0.000109107	2.01429	0.0314653
54	2411.76	15.641	46408.5	98.0233	804.723	8.21101	238.977	4.37764	6.5534	0.728156	0.051968	0.000354452	0.296968	0.00622692	0.00814367	0.000908661	0.01734	0.00018068	0.0213784	0.000195492	2.04651	0.0930595			54	9842.53	39.9243	187380	328.153	3635.92	17.9142	1021.71	9.24824	32.8334	1.65413	0.052527	0.000232075	0.281004	0.00289597	0.00903028	0.00045711	0.019404	0.000101463	0.0236161	0.000109619	2.01405	0.0309615
55	2394.54	15.5741	46004.1	97.3421	799.85	8.18576	231.774	4.31103	7.8479	0.796834	0.0520506	0.000356003	0.289771	0.00615178	0.00981172	0.00100128	0.0173865	0.000181699	0.0213152	0.000196022	2.04256	0.0919867			55	9716.46	39.5427	185592	325.246	3603	17.828	1036.49	9.31545	31.7501	1.62661	0.0523539	0.000231978	0.287674	0.00295141	0.00881211	0.00045356	0.0194136	0.000101907	0.0237547	0.000110432	2.01403	0.030472
56	2338.64	15.3563	45690.9	96.8145	795.225	8.16172	225.211	4.24944	5.58253	0.672057	0.0511839	0.000353156	0.283204	0.00608306	0.00702006	0.000848182	0.0174045	0.000182396	0.021246	0.00019643	2.03866	0.0909554			56	9658.62	39.3674	184465	323.415	3583.02	17.7755	1005.51	9.17406	30.9167	1.60512	0.0523601	0.00023232	0.280633	0.00291447	0.00862869	0.000450021	0.0194238	0.000102203	0.0236371	0.000110417	2.01383	0.0300077
57	2323.3	15.2962	45221.8	96.0239	790.517	8.13719	222.65	4.22516	6.5534	0.728156	0.0513755	0.000355405	0.281651	0.00608048	0.00829002	0.000925058	0.0174809	0.000183728	0.0213096	0.000197706	2.03502	0.0899263			57	9624.92	39.2653	182950	320.953	3530.11	17.636	1016.81	9.22586	30.7501	1.60079	0.0526094	0.000233625	0.288039	0.00298345	0.00871079	0.00045555	0.0192955	0.000102168	0.0236111	0.000110696	2.01361	0.0295634
58	2325.74	15.3058	44926.7	95.5262	780.937	8.08704	220.009	4.19998	6.71521	0.737091	0.0517675	0.000358025	0.281724	0.00611847	0.00859892	0.000948046	0.0173825	0.00018376	0.0211829	0.000197667	2.03134	0.0889523			58	9496.63	38.8761	180815	317.481	3508.88	17.5797	979.521	9.05378	30.5834	1.59644	0.0525213	0.000233947	0.279155	0.00293491	0.00871599	0.000457063	0.0194059	0.000103023	0.0235845	0.000111208	2.01336	0.0291391
59	2303.87	15.2201	44574	94.9312	771.273	8.03616	216.887	4.17003	7.28156	0.767544	0.0516865	0.000358762	0.281207	0.00614956	0.00944095	0.00100001	0.0173032	0.000184016	0.0210795	0.000197913	2.02767	0.0880242			59	9415.96	38.6311	179498	315.341	3464.44	17.4615	981.514	9.06306	29.1667	1.55903	0.0524572	0.000234118	0.283311	0.00298038	0.0084189	0.000452006	0.0193007	0.00010302	0.0235342	0.000111407	2.01306	0.0287346
60	2284.61	15.1444	44161.4	94.2349	758.637	7.96916	219.288	4.19309	6.5534	0.728156	0.0517333	0.000360262	0.289056	0.00630627	0.00863839	0.000964101	0.0171787	0.000184141	0.0210551	0.000198649	2.02411	0.087119			60	9323.44	38.3499	178294	313.383	3431.68	17.374	961.833	8.97103	30.4167	1.59209	0.0522925	0.000233909	0.28028	0.00297448	0.00886351	0.000466103	0.0192473	0.000103151	0.0234174	0.000111421	2.01261	0.0283557
61	2278.09	15.1187	43718.9	93.4878	776.807	8.06533	217.048	4.17157	5.66343	0.67691	0.0521075	0.000363323	0.27941	0.00610364	0.00729066	0.000874682	0.0177682	0.000188353	0.0216069	0.000202361	2.02135	0.0861005			61	9273.09	38.1968	177038	311.341	3392.13	17.2678	966.732	8.99402	30.1667	1.58553	0.0523792	0.000234596	0.284993	0.0030224	0.00889316	0.000469603	0.0191605	0.000103194	0.0233956	0.000111678	2.01216	0.0279925
62	2229.86	14.9281	43347.8	92.8607	758.637	7.96916	219.689	4.19692	6.22978	0.709949	0.0514411	0.000361582	0.289583	0.00631336	0.0082118	0.000939789	0.0175012	0.000187626	0.021465	0.000202517	2.01852	0.0851376			62	9243.35	38.1063	175608	309.017	3380.18	17.2357	966.732	8.99402	29.9167	1.57895	0.0526362	0.000235937	0.286	0.00303424	0.00885062	0.000469294	0.0192484	0.000103829	0.0235157	0.000112383	2.01187	0.0276313
63	2242.91	14.9798	42751.1	91.852	756.242	7.9564	216.167	4.16309	4.85437	0.626697	0.0524644	0.000368081	0.285844	0.00627287	0.00641907	0.000831446	0.0176894	0.000189951	0.021612	0.000204521	2.01598	0.0841677			63	9220.2	38.0359	174410	307.067	3350.58	17.1557	943.148	8.8828	30.2501	1.58772	0.0528652	0.000237115	0.281488	0.00301757	0.0090283	0.000476113	0.019211	0.000104017	0.0233825	0.000112342	2.01143	0.0272944
64	2197.87	14.8011	42485	91.4018	744.927	7.89586	210.565	4.10869	5.98706	0.695982	0.0517328	0.000365731	0.282665	0.00627679	0.00803711	0.000938171	0.0175339	0.00018964	0.0213839	0.000204071	2.01326	0.0832668			64	9082.77	37.6173	173330	305.311	3315.01	17.0593	935.757	8.84767	26.4167	1.48371	0.0524018	0.000235841	0.282279	0.00303868	0.00796882	0.000449449	0.0191255	0.000104027	0.0233031	0.000112441	2.01091	0.0269773
65	2191.58	14.7761	42119.5	90.7834	732.456	7.82861	212.166	4.12431	5.66343	0.67691	0.0520325	0.000368304	0.289663	0.00642579	0.00773212	0.000927853	0.0173899	0.000189608	0.0213179	0.000204536	2.01057	0.0823991			65	9043.64	37.498	171693	302.651	3315.26	17.06	929.114	8.81597	28.5001	1.54111	0.0526733	0.000237319	0.280254	0.0030251	0.00859664	0.000466954	0.0193092	0.000105031	0.0234837	0.000113398	2.01061	0.026654
66	2166.37	14.6755	41676.8	90.0337	752.856	7.93832	206.243	4.06623	7.11974	0.758968	0.0519802	0.000369599	0.273948	0.006125	0.00945698	0.00101304	0.0180642	0.00019443	0.0218757	0.000208463	2.00857	0.0814494			66	8930.35	37.1523	170038	299.958	3260.36	16.9103	915.162	8.74905	28.3334	1.5366	0.0525199	0.000237326	0.280693	0.00305294	0.00869026	0.000473447	0.0191744	0.000105045	0.0233311	0.000113448	2.01016	0.0263549
67	2135.76	14.5531	41422.5	89.6029	734.603	7.84023	216.807	4.16926	6.63431	0.732637	0.0515605	0.000368611	0.295135	0.00649103	0.00903114	0.00100197	0.0177344	0.000193123	0.0218423	0.000208882	2.0066	0.0805287			67	8841.45	36.8808	168560	297.555	3190.3	16.7177	907.273	8.71098	27.2501	1.50693	0.0524529	0.000237585	0.284385	0.00311066	0.00854155	0.000474465	0.0189268	0.000104656	0.0230977	0.000113206	2.00946	0.0260938
68	2136.99	14.558	41149.1	89.1397	729.482	7.8125	208.484	4.0883	6.71521	0.737091	0.0519328	0.000371242	0.285797	0.00638573	0.00920545	0.00101523	0.0177278	0.000193703	0.021669	0.000208662	2.00451	0.079659			68	8786.58	36.7131	167579	295.959	3197.18	16.7367	895.979	8.6562	30.6667	1.59862	0.0524326	0.000237846	0.280241	0.00307936	0.00959182	0.000502524	0.0190787	0.000105405	0.0232084	0.000113819	2.00891	0.0258254
69	2085.74	14.3517	40808.3	88.5619	732.373	7.82817	204.562	4.0496	7.8479	0.796834	0.0511107	0.000368763	0.279314	0.00628394	0.0107157	0.00109403	0.0179467	0.000195742	0.021843	0.000210491	2.00267	0.078783			69	8667.7	36.3493	165619	292.772	3179.51	16.688	888.755	8.62099	27.1667	1.50463	0.0523352	0.000238178	0.279525	0.00308289	0.0085443	0.000475346	0.0191978	0.000106323	0.0233424	0.000114787	2.00852	0.0255518
70	2076.19	14.3131	40400.2	87.8695	719.076	7.75586	206.083	4.06465	6.4725	0.723647	0.0513906	0.000371497	0.286594	0.00644261	0.00900113	0.00101103	0.0177988	0.00019584	0.0217805	0.000211142	2.00082	0.0779383			70	8664.32	36.339	164427	290.833	3136.31	16.5681	895.813	8.6554	25.9167	1.46961	0.052694	0.000239853	0.285626	0.00314529	0.00826343	0.000470606	0.0190742	0.000106261	0.0232948	0.000114972	2.00809	0.0252908
71	2042.08	14.1748	39963	87.1273	738.815	7.86297	202.561	4.02972	7.76699	0.792716	0.0510994	0.000371784	0.274171	0.00618575	0.0105128	0.00107877	0.0184875	0.000200842	0.022411	0.00021555	1.99965	0.0770332			71	8540.5	35.9596	162861	288.286	3127.86	16.5446	876.132	8.55912	25.7501	1.46487	0.0524404	0.000239518	0.280106	0.00311177	0.00823249	0.000470351	0.0192057	0.000107125	0.0233603	0.000115665	2.00774	0.0250322
72	2046.57	14.1931	39492.6	86.3284	716.351	7.74096	203.122	4.03529	5.33981	0.657285	0.0518216	0.000376815	0.283551	0.00641254	0.00745418	0.000921076	0.0181388	0.00019998	0.022135	0.000215262	1.99826	0.0761855			72	8495.11	35.8203	160904	285.101	3080.51	16.4123	866.997	8.51407	26.3334	1.48137	0.0527963	0.000241477	0.281446	0.00314441	0.00854839	0.000483037	0.0191451	0.000107494	0.0233031	0.000116084	2.00734	0.0247865
73	1996.79	13.9902	38850.9	85.2373	692.069	7.60698	191.037	3.91321	6.4725	0.723647	0.0513962	0.000377341	0.276037	0.00641698	0.00935238	0.00105067	0.0178135	0.000199662	0.0216195	0.000214356	1.99644	0.075429			73	8346.33	35.3635	159257	282.423	3029.35	16.2684	849.558	8.42742	25.8334	1.46724	0.0524079	0.000240718	0.280442	0.00316343	0.0085277	0.000486502	0.0190218	0.000107578	0.0231434	0.000116166	2.00681	0.0245634
74	1960.89	13.8429	38332.6	84.3552	692.234	7.6079	191.917	3.92223	6.22978	0.709949	0.0511545	0.000378265	0.277243	0.00643337	0.00899952	0.00103035	0.0180586	0.00020241	0.0219428	0.000217468	1.99498	0.0746488			74	8225.39	34.9915	157641	279.793	2992.86	16.1652	845.738	8.40833	26.9167	1.49769	0.0521781	0.000240515	0.282585	0.00319729	0.00899363	0.000502772	0.0189854	0.000107939	0.0231428	0.000116688	2.00629	0.0243466
75	1954.44	13.8164	37701.3	83.2797	682.902	7.55582	195.439	3.95811	6.63431	0.732637	0.0518401	0.000383944	0.286188	0.00660457	0.00971488	0.0010782	0.0181135	0.000204368	0.0221491	0.000220203	1.99375	0.0738656			75	8192.19	34.8892	155982	277.093	2937.64	16.0078	837.766	8.36834	26.9167	1.49769	0.0525203	0.000242354	0.285183	0.00324497	0.0091627	0.000512266	0.0188333	0.000107942	0.0229964	0.000116773	2.00565	0.0241523
76	1916.17	13.6584	37177.1	82.3857	684.471	7.5646	199.28	3.99689	6.31068	0.714544	0.0515416	0.000384732	0.291145	0.00666721	0.0092198	0.0010489	0.0184111	0.000207525	0.0226062	0.000224116	1.99296	0.0730599			76	8092.68	34.5826	154644	274.917	2918.49	15.953	816.424	8.26036	28.4167	1.53886	0.052331	0.000242206	0.279742	0.00321701	0.0097368	0.000529958	0.0188723	0.000108478	0.0229506	0.000117103	2.00499	0.0239683
77	1892.5	13.5602	36393.2	81.0473	684.306	7.56367	191.517	3.91814	4.61165	0.610828	0.0520015	0.000390183	0.27987	0.00650792	0.00673917	0.000895728	0.0188031	0.000212008	0.0228759	0.000227845	1.99242	0.0722585			77	8005.85	34.3147	152960	272.176	2873.71	15.8241	808.452	8.21967	24.8334	1.43856	0.0523396	0.000242902	0.281327	0.00325286	0.00864157	0.00050285	0.0187874	0.00010872	0.0228755	0.000117439	2.00429	0.0237982
78	1822.16	13.2661	35850.4	80.1193	651.683	7.37904	183.914	3.83945	6.06796	0.700668	0.0508267	0.00038708	0.282214	0.00670241	0.00931122	0.00108033	0.0181778	0.000209799	0.0221805	0.000225919	1.99133	0.071537			78	7917.38	34.0414	151294	269.465	2861.61	15.7891	790.598	8.12782	25.9167	1.46961	0.0523311	0.000243542	0.276278	0.00322352	0.0090567	0.000515985	0.0189142	0.000109663	0.0229393	0.000118205	2.00366	0.0236235
79	1799.31	13.1698	35313	79.1995	660.355	7.42854	187.195	3.87361	6.5534	0.728156	0.0509533	0.00039006	0.283477	0.00667672	0.00992406	0.00110831	0.0187	0.000214503	0.0228374	0.000231086	1.99081	0.070782			79	7834.34	33.7846	149525	266.586	2831.76	15.7026	802.141	8.18732	22.6667	1.37437	0.0523948	0.000244494	0.283266	0.00329038	0.00800447	0.000487369	0.0189383	0.000110311	0.023093	0.000119247	2.00318	0.0234365
80	1801.27	13.1781	34831.2	78.374	641.689	7.32159	185.194	3.85282	6.22978	0.709949	0.0517144	0.000395831	0.288604	0.00684788	0.0097084	0.00111191	0.0184229	0.000214251	0.0225724	0.000231098	1.99009	0.0700655			80	7751.23	33.5272	147970	264.054	2807.96	15.6333	795.165	8.15141	24.5834	1.4313	0.0523839	0.000245107	0.283183	0.00330347	0.00875489	0.000512055	0.0189766	0.000110946	0.0231383	0.00011993	2.00276	0.0232502
81	1752.88	12.973	34231.1	77.3447	627.236	7.23773	181.993	3.81932	6.06796	0.700668	0.0512073	0.00039625	0.29015	0.00694888	0.00967413	0.00112264	0.0183236	0.000215453	0.0224886	0.000232646	1.98934	0.0693749			81	7682.44	33.314	145886	260.662	2759.78	15.4923	774.903	8.04624	23.25	1.39195	0.0526605	0.000246981	0.280784	0.00331432	0.00842458	0.00050658	0.0189174	0.000111443	0.023017	0.000120306	2.00225	0.0230799
82	1747.25	12.949	33825.9	76.6489	640.451	7.31443	180.632	3.80499	6.31068	0.714544	0.0516543	0.000400307	0.282039	0.00675814	0.0098535	0.00112135	0.0189337	0.000220453	0.0230815	0.000237199	1.98904	0.0686655			82	7566.63	32.9545	144076	257.714	2706.89	15.3361	758.046	7.9577	23.9167	1.41176	0.0525185	0.000247271	0.280044	0.00334063	0.00883551	0.000523941	0.018788	0.000111624	0.0228494	0.000120476	2.00162	0.0229315
83	1716.82	12.8189	33318.8	75.7773	634.835	7.28193	178.552	3.78298	4.69256	0.616163	0.0515269	0.000402187	0.281257	0.00677628	0.00739178	0.000974285	0.0190533	0.000222807	0.023216	0.000239689	1.98886	0.0679695			83	7503.29	32.7576	142291	254.807	2685.41	15.2724	745.59	7.89166	23	1.38444	0.0527321	0.00024883	0.277645	0.00333607	0.00856481	0.000517838	0.0188727	0.000112528	0.0229048	0.0001213	2.00105	0.0227799
84	1704.25	12.765	32849.8	74.9701	623.189	7.21408	172.389	3.71703	6.06796	0.700668	0.0518801	0.000406225	0.276624	0.00676977	0.00973695	0.00112996	0.0189709	0.000223835	0.0230242	0.000240265	1.98854	0.0673004			84	7389.45	32.4032	140924	252.581	2688.06	15.2803	750.157	7.91594	22.5834	1.37184	0.0524357	0.0002484	0.27907	0.00334495	0.00840135	0.000512576	0.0190746	0.000113691	0.0231821	0.000122669	2.00072	0.0226079
85	1682.13	12.6698	32464.8	74.3069	618.812	7.18842	173.91	3.73341	4.53075	0.605447	0.0518141	0.000407885	0.281038	0.00685984	0.00732168	0.000982091	0.019061	0.000225679	0.023215	0.000242686	1.98836	0.06664			85	7357.57	32.3039	139489	250.245	2654.32	15.1797	740.109	7.86243	23.25	1.39195	0.0527465	0.000250174	0.278832	0.00336407	0.00875933	0.000526795	0.0190288	0.000114052	0.0231154	0.000123003	2.00034	0.0224448
86	1652.11	12.54	32011	73.5242	619.803	7.19424	175.11	3.74629	5.2589	0.652287	0.0516107	0.000409283	0.282525	0.00687663	0.00848479	0.00105701	0.0193622	0.000229101	0.0236138	0.000246568	1.98846	0.065985			86	7232.95	31.9151	137913	247.677	2588.98	14.9834	738.448	7.85355	21.6667	1.34371	0.0524458	0.000249848	0.285227	0.0034535	0.00836881	0.000521268	0.0187726	0.000113755	0.0229248	0.000123044	1.99983	0.0223015
87	1628.85	12.4389	31531.1	72.6957	598.413	7.06766	172.309	3.71617	4.93528	0.631898	0.0516585	0.000412082	0.287943	0.00708026	0.00824728	0.00106044	0.0189785	0.000228379	0.0232425	0.000246291	1.98831	0.0653577			87	7152.23	31.6628	136680	245.669	2573.73	14.9372	720.428	7.75658	23.6667	1.40436	0.0523283	0.000250022	0.279916	0.00342373	0.00919551	0.000548257	0.0188303	0.000114407	0.0229028	0.000123487	1.99932	0.0221632
88	1624.61	12.4204	31107.7	71.9637	591.228	7.02464	167.987	3.6692	4.69256	0.616163	0.0522253	0.000417149	0.284133	0.00706485	0.00793697	0.00104643	0.0190059	0.000230058	0.0231947	0.00024759	1.98813	0.0647478			88	7102.48	31.5071	135077	243.058	2515.44	14.7598	705.813	7.67705	20.25	1.29904	0.0525808	0.000251711	0.280592	0.00346774	0.0080503	0.000518583	0.0186222	0.000114291	0.0226562	0.000123359	1.99865	0.0220537
89	1576.3	12.2087	30805.3	71.4405	582.06	6.9694	166.306	3.65077	5.98706	0.695982	0.0511698	0.000413702	0.28572	0.00714451	0.010286	0.00120205	0.0188948	0.000230445	0.0231108	0.000248413	1.9879	0.0641553			89	6998.94	31.1827	133693	240.802	2537.16	14.8261	707.224	7.68477	22.3334	1.36423	0.052351	0.00025158	0.278746	0.0034391	0.0088025	0.000540154	0.0189775	0.000116045	0.0230603	0.000125189	1.99828	0.0219079
90	1563.33	12.1515	30246.3	70.4719	577.518	6.94187	163.425	3.61897	4.85437	0.626697	0.0516866	0.000419412	0.282979	0.00713007	0.00840558	0.00108985	0.0190939	0.000233784	0.0232931	0.000251617	1.9878	0.0635722			90	6918.39	30.9299	132172	238.323	2483.52	14.6618	689.038	7.58477	21.5	1.33854	0.052344	0.00025233	0.277445	0.00346555	0.00865709	0.000541386	0.0187901	0.000115989	0.0228094	0.000125054	1.99775	0.0217861
91	1532.24	12.0137	29711.5	69.544	579.83	6.9559	166.466	3.65253	4.77346	0.621452	0.0515705	0.000421978	0.287095	0.00717937	0.00823252	0.00107632	0.0195153	0.000238529	0.0238863	0.000257183	1.98805	0.0629933			91	6856.7	30.7361	130596	235.756	2481.03	14.6541	689.703	7.58844	22.0834	1.35657	0.052503	0.000253719	0.277991	0.00347145	0.00890089	0.0005493	0.0189977	0.000117333	0.0230677	0.000126515	1.9974	0.0216461
92	1511.51	11.9214	29362.9	68.9383	570.663	6.90013	160.144	3.5824	5.50162	0.66717	0.0514769	0.000423607	0.280628	0.00713598	0.00964075	0.00117491	0.0194348	0.000239383	0.0236703	0.000257464	1.98817	0.0624305			92	6726.9	30.3275	128355	232.103	2438.08	14.5214	689.786	7.5889	23.9167	1.41176	0.0524085	0.000254575	0.282922	0.00353952	0.00980964	0.000581986	0.0189948	0.000118234	0.0231553	0.00012776	1.99713	0.0215047
93	1491.6	11.8323	28866.7	68.0751	570.663	6.90013	155.502	3.53003	4.69256	0.616163	0.051672	0.000427622	0.272494	0.00700861	0.00822299	0.0010843	0.0197689	0.000243538	0.0239198	0.000261046	1.98843	0.0618795			93	6625.76	30.0084	126623	229.279	2364.62	14.292	671.766	7.48858	20.3334	1.30171	0.0523268	0.000255229	0.28409	0.00360246	0.00859899	0.000552943	0.0186746	0.000117827	0.0227874	0.000127383	1.99662	0.0213924
94	1454.56	11.6654	28522.9	67.476	549.933	6.77239	156.702	3.54365	4.77346	0.621452	0.0509961	0.000426406	0.284948	0.00733732	0.00868008	0.0011351	0.0192804	0.000241778	0.0235722	0.000260598	1.98849	0.0613455			94	6541.67	29.7426	124486	225.794	2324.66	14.1659	654.909	7.39353	23.1667	1.38945	0.0525497	0.000257235	0.281722	0.00361423	0.00996564	0.000600777	0.0186741	0.000118729	0.0227401	0.000128199	1.9961	0.0212864
95	1456.92	11.6761	28204.7	66.921	552.081	6.78573	151.661	3.4861	5.178	0.64725	0.0516554	0.00043174	0.274707	0.00716053	0.00937906	0.00117804	0.0195741	0.000245031	0.0237257	0.000262873	1.98863	0.0608212			95	6448.77	29.4484	122908	223.222	2313.88	14.1317	644.695	7.33535	18.5	1.24164	0.0524681	0.000257851	0.278621	0.00359797	0.00799524	0.000538823	0.0188261	0.000119953	0.0228714	0.000129364	1.99568	0.0211714
96	1435.46	11.5789	27793.9	66.2037	552.824	6.79034	155.182	3.52639	4.85437	0.626697	0.0516467	0.000434381	0.280707	0.00725109	0.00878104	0.00113875	0.0198901	0.000248862	0.0242224	0.000267631	1.98904	0.0603076			96	6385.6	29.2481	121465	220.868	2306.34	14.1077	647.601	7.35195	19.8334	1.28561	0.0525716	0.000259076	0.280792	0.003621	0.00859951	0.000559901	0.0189877	0.00012117	0.0231046	0.000130782	1.99541	0.0210443
97	1403.8	11.4345	27350	65.4274	545.061	6.74202	153.501	3.50722	4.85437	0.626697	0.0513273	0.000435737	0.281622	0.00731697	0.00890611	0.00115504	0.0199291	0.000251077	0.0242946	0.000270194	1.98948	0.0598068			97	6300.19	28.9768	119805	218.159	2262.97	13.9693	632.322	7.26426	17.75	1.21621	0.0525872	0.000260133	0.279421	0.00364411	0.00784367	0.000539617	0.0188889	0.000121568	0.0229594	0.000131129	1.99506	0.0209282
98	1383.73	11.3423	26898.3	64.6362	536.884	6.69078	151.5	3.48426	4.36893	0.594537	0.051443	0.000439421	0.282184	0.00738133	0.00813757	0.00111202	0.0199598	0.000253325	0.02434	0.000272643	1.98993	0.0593184			98	6203.34	28.6685	118072	215.332	2222.68	13.8395	625.43	7.22436	19.6667	1.28019	0.0525388	0.000261028	0.281385	0.00369243	0.00884819	0.000578598	0.0188248	0.000122137	0.0229178	0.000131855	1.99469	0.0208171
99	1357.62	11.2218	26461.6	63.8699	531.847	6.65901	144.938	3.40787	4.61165	0.610828	0.0513054	0.000441791	0.272518	0.00725946	0.00867102	0.00115362	0.0200988	0.000256282	0.024328	0.000274808	1.99035	0.0588415			99	6109.62	28.3696	116823	213.295	2182.8	13.7101	626.26	7.22918	20.3334	1.30171	0.0522979	0.000260939	0.286907	0.00377041	0.00931526	0.000599213	0.0186846	0.000122215	0.0228503	0.000132271	1.9943	0.0207126
100	1339.67	11.1385	26085.4	63.2089	530.773	6.65222	150.06	3.46763	4.61165	0.610828	0.051357	0.000444766	0.282719	0.00743221	0.00868856	0.00115597	0.0203475	0.00025974	0.0248252	0.000279639	1.99102	0.0583832			100	6010.22	28.0518	114844	210.065	2168.87	13.6647	630.744	7.25515	20.0834	1.29368	0.0523338	0.000262347	0.290817	0.00381405	0.00925982	0.000599324	0.0188854	0.000123898	0.0231652	0.000134307	1.99409	0.0205938
101	1320.25	11.0479	25748	62.6152	522.349	6.59873	148.459	3.44907	3.72168	0.548732	0.0512757	0.00044683	0.284214	0.00751603	0.0071249	0.00105436	0.0202869	0.000260986	0.024782	0.000281165	1.99165	0.0579337			101	5965.59	27.9088	113488	207.85	2122.36	13.512	599.106	7.06995	21.1667	1.32812	0.0525661	0.000264093	0.282283	0.00378503	0.00997319	0.000628987	0.0187013	0.00012389	0.0227827	0.000133783	1.99368	0.0204981
102	1297.65	10.9419	25204	61.656	526.891	6.62763	143.657	3.39276	3.31715	0.518052	0.0514859	0.000452036	0.27265	0.00729558	0.00629571	0.000986408	0.0209051	0.000267886	0.0253022	0.000287238	1.9925	0.0575107			102	5861.82	27.5759	111984	205.395	2110.67	13.4733	590.719	7.02006	17.3333	1.20185	0.0523453	0.000264304	0.279873	0.00377544	0.00821225	0.000571826	0.018848	0.000125183	0.0229231	0.000135074	1.99336	0.0203953
103	1305.24	10.9776	24806.3	60.9534	503.601	6.47814	143.497	3.39087	4.04531	0.572093	0.0526172	0.000461033	0.284942	0.00766626	0.00803276	0.00114069	0.0203014	0.000265871	0.0247821	0.00028613	1.9931	0.0570814			103	5802.7	27.3858	110478	202.937	2105.36	13.4558	598.691	7.06749	17.4167	1.20474	0.0525233	0.000265998	0.284364	0.0038173	0.00827253	0.000574661	0.0190568	0.000126726	0.0232544	0.000136974	1.99321	0.0202811
104	1266.89	10.7966	24386.9	60.2114	499.224	6.44968	138.535	3.33166	4.04531	0.572093	0.0519494	0.000460926	0.277501	0.00757569	0.00810319	0.00115074	0.020471	0.000269259	0.0248602	0.000289116	1.99371	0.0566634			104	5763.5	27.2597	109310	201.029	2058.52	13.2999	572.201	6.90864	17.4167	1.20474	0.0527262	0.000267568	0.277967	0.00380642	0.00846077	0.000587792	0.018832	0.000126505	0.0228613	0.000136334	1.99287	0.020186
105	1233.84	10.6391	23867.2	59.2895	503.106	6.47493	136.774	3.31039	4.53075	0.605447	0.0516962	0.000463893	0.27186	0.00745231	0.00900555	0.00120899	0.0210794	0.000276298	0.0254922	0.000296102	1.99458	0.0562751			105	5681.06	26.9939	107960	198.823	2025.11	13.1877	570.956	6.90108	18.75	1.25	0.0526221	0.000268161	0.281938	0.00387088	0.00925876	0.00062019	0.018758	0.000126945	0.0228445	0.000137046	1.99253	0.0200936
106	1197.29	10.4631	23315.8	58.3092	488.488	6.37933	134.053	3.27726	5.2589	0.652287	0.0513509	0.00046677	0.274425	0.00760619	0.0107657	0.0013427	0.0209509	0.000278577	0.0253963	0.000298943	1.99538	0.0558917			106	5633.63	26.8407	106674	196.723	1991.78	13.075	568.132	6.88392	17.5	1.20762	0.0528116	0.000269805	0.285238	0.00393078	0.00878611	0.000609037	0.0186717	0.000127314	0.0227937	0.000137604	1.99217	0.0200057
107	1198.35	10.4682	23179.4	58.0663	486.341	6.36517	133.573	3.27138	4.61165	0.610828	0.0516988	0.000469821	0.274649	0.00762673	0.00948235	0.00126209	0.0209816	0.00027959	0.0254295	0.000299954	1.99618	0.0555161			107	5551.78	26.5759	105380	194.609	1983.91	13.0482	568.796	6.88796	19.8334	1.28561	0.0526832	0.000270306	0.286705	0.00395094	0.00999712	0.000651345	0.0188261	0.000128608	0.0230114	0.000139107	1.99192	0.0199085
108	1159.26	10.278	22665.3	57.1491	469.08	6.25023	137.014	3.3133	2.83172	0.478648	0.0511471	0.00047145	0.292092	0.00806468	0.00603675	0.00102356	0.020696	0.000280657	0.0254399	0.000303331	1.99696	0.055149			108	5523.62	26.4846	104382	192.976	1967.91	12.9937	558.168	6.82301	17.75	1.21621	0.0529174	0.000271936	0.283635	0.00394061	0.00901975	0.000620887	0.018853	0.00012927	0.0229841	0.000139609	1.99167	0.0198142
109	1153.31	10.2488	22225.5	56.3625	454.71	6.15296	129.972	3.22693	3.72168	0.548732	0.0518911	0.000479536	0.285834	0.00808224	0.00818475	0.00121185	0.0204589	0.000281662	0.025009	0.000303436	1.99755	0.0547771			109	5410.31	26.1168	103127	190.925	1939.14	12.8952	545.961	6.74766	17.8333	1.21907	0.0524627	0.000271236	0.281548	0.00395144	0.00919654	0.000631631	0.0188035	0.000129798	0.0228963	0.000140118	1.99138	0.0197257
110	1128.99	10.129	21997	55.9531	456.031	6.16197	126.29	3.18085	4.44984	0.600016	0.0513248	0.000478622	0.276933	0.00791542	0.00975775	0.00132233	0.0207315	0.000285047	0.0251803	0.000306183	1.99819	0.0544164			110	5327.96	25.8487	101697	188.587	1907.55	12.7862	545.462	6.74457	17.8333	1.21907	0.0523906	0.000272108	0.285949	0.00402183	0.00934882	0.000642138	0.0187572	0.000130452	0.02292	0.000141089	1.99111	0.0196377
111	1110.8	10.0388	21512.4	55.083	440.092	6.05246	128.291	3.20597	4.20712	0.583423	0.0516352	0.000485019	0.291509	0.00831507	0.00955964	0.00133219	0.0204576	0.000286182	0.0251239	0.000309067	1.99879	0.0540619			111	5259.29	25.6245	100467	186.577	1891.63	12.731	532.093	6.66105	16.0833	1.15771	0.0523482	0.000272953	0.281288	0.00399795	0.00850236	0.000614683	0.0188283	0.000131454	0.0229245	0.000141903	1.99085	0.0195512
112	1088.77	9.9288	21140.6	54.4138	453.636	6.14563	128.691	3.21097	3.15534	0.505259	0.0515012	0.000488004	0.283688	0.00805438	0.00695566	0.00111778	0.021458	0.000295903	0.0261963	0.000318663	1.99978	0.0537553			112	5199.42	25.4288	99136	184.399	1864.69	12.6371	528.356	6.63752	16.25	1.16369	0.0524474	0.000274429	0.283348	0.00404451	0.0087146	0.000626855	0.0188094	0.000132186	0.0229361	0.000142799	1.9906	0.0194659
113	1066.66	9.81758	20645.5	53.5203	440.505	6.05532	121.248	3.11664	4.04531	0.572093	0.0516653	0.000494033	0.275248	0.00802332	0.00918335	0.00130484	0.0213366	0.00029847	0.0258727	0.000320295	2.00062	0.0534394			113	5129.43	25.1995	98179.3	182.834	1848.03	12.5787	513.908	6.54575	15.1667	1.12423	0.0522456	0.00027449	0.278085	0.00401605	0.00820697	0.000610901	0.018823	0.000132828	0.0228629	0.000143206	1.99032	0.0193852
114	1061.6	9.79201	20287.5	52.8725	433.733	6.00823	121.248	3.11664	3.9644	0.566343	0.0523276	0.000501559	0.279546	0.00816262	0.0091402	0.00131187	0.0213793	0.00030135	0.0259955	0.000323728	2.00148	0.0531342			114	5110.74	25.1381	97251.8	181.317	1830.28	12.5162	521.547	6.59443	15.4167	1.13346	0.0525516	0.000276431	0.284954	0.00409615	0.00842311	0.000621953	0.0188201	0.000133397	0.0229755	0.000144184	1.9901	0.0193012
115	1016.48	9.56194	20022	52.3909	428.282	5.97006	122.208	3.12897	2.50809	0.450466	0.0507681	0.000495705	0.285346	0.00831847	0.00585617	0.00105496	0.0213906	0.000303384	0.026166	0.000327157	2.00239	0.0528418			115	5067.26	24.9954	96122.5	179.469	1816.36	12.467	508.095	6.50848	15.8333	1.14867	0.0527167	0.000278041	0.279733	0.00406525	0.0087171	0.000635229	0.0188963	0.000134412	0.0229712	0.000144943	1.98988	0.019219
116	1002.03	9.48749	19537.2	51.5097	432.576	6.00015	117.727	3.071	3.80259	0.554665	0.0512886	0.000504087	0.272152	0.00804056	0.00879056	0.00128802	0.0221412	0.000312613	0.0267928	0.000335208	2.00348	0.0525883			116	4982.86	24.7176	95150	177.877	1787.75	12.3654	494.975	6.42356	13.4167	1.05738	0.0523685	0.00027761	0.27687	0.00407157	0.00750477	0.000593733	0.0187888	0.00013462	0.022797	0.00014504	1.98958	0.0191453
117	992.163	9.43637	19077	50.6702	425.969	5.9538	124.85	3.16263	3.23625	0.511696	0.0520084	0.000513574	0.293095	0.00847975	0.00759737	0.00120593	0.022329	0.000317679	0.0274461	0.000343237	2.00476	0.0523827			117	4975.37	24.6929	94371.1	176.602	1770.01	12.302	504.441	6.48494	12	1	0.0527213	0.000279639	0.284993	0.00416494	0.00677962	0.00056693	0.0187559	0.000135	0.0228941	0.000145888	1.98934	0.0190687
118	967.195	9.30621	18909.2	50.3635	408.296	5.82806	117.326	3.06577	3.47897	0.530537	0.0511495	0.000510661	0.287357	0.00855599	0.0085207	0.00130507	0.0215925	0.000313533	0.0264446	0.000338244	2.00568	0.0521165			118	4904.64	24.4594	93250.2	174.767	1756.83	12.2547	499.957	6.45594	14.6667	1.10554	0.0525965	0.00028021	0.284579	0.00417665	0.00834837	0.000631972	0.01884	0.000136078	0.0229921	0.000147046	1.98914	0.0189899
119	936.762	9.1458	18493.6	49.6021	404.91	5.80367	115.886	3.04687	4.04531	0.572093	0.0506532	0.000512859	0.286202	0.00857035	0.00999064	0.00142013	0.0218945	0.000319267	0.0268031	0.00034445	2.0067	0.0518731			119	4867.59	24.3368	92362.3	173.312	1742.99	12.2049	483.349	6.34738	16.0833	1.15771	0.052701	0.000281439	0.277311	0.00412703	0.00922747	0.000667344	0.0188712	0.000136804	0.0228976	0.000147368	1.98891	0.0189157
120	931.458	9.11764	18223.2	49.1052	404.993	5.80426	112.445	3.00125	4.53075	0.605447	0.0511139	0.000518944	0.277646	0.00841137	0.0111872	0.00150353	0.022224	0.000324091	0.0270137	0.00034833	2.00775	0.0516449			120	4765.07	23.997	91235.2	171.466	1719.36	12.1194	493.065	6.41111	14.75	1.10868	0.0522285	0.000280742	0.286773	0.00424144	0.00857879	0.000647651	0.0188454	0.000137477	0.023046	0.000148744	1.98874	0.0188382
121	931.132	9.11591	17867.7	48.4505	398.22	5.75518	116.526	3.05529	3.15534	0.505259	0.0521125	0.000529396	0.292617	0.00876066	0.00792361	0.00127395	0.0222871	0.000327719	0.0273818	0.000353971	2.0089	0.0514423			121	4747.95	23.9401	90407.3	170.11	1715.46	12.1052	463.503	6.21521	13.4167	1.05738	0.0525173	0.000282639	0.270192	0.00409411	0.00782103	0.00061885	0.0189748	0.000138575	0.0228991	0.000148859	1.98852	0.0187665
122	904.941	8.97593	17493.2	47.7585	392.687	5.71477	109.243	2.95818	3.80259	0.554665	0.051731	0.000532191	0.278194	0.00855216	0.00968351	0.0014195	0.022448	0.000332384	0.0272816	0.00035711	2.00998	0.051235			122	4709.17	23.8111	89379	168.425	1679.57	11.9742	468.818	6.25088	13.0833	1.04417	0.0526876	0.000284305	0.27913	0.00422035	0.00778972	0.000624163	0.0187915	0.000138572	0.0228337	0.00014938	1.98827	0.0186984
123	882.015	8.85209	17204.8	47.2242	395.578	5.73592	110.124	2.97009	3.55987	0.536671	0.0512655	0.000533407	0.278387	0.00852454	0.00899917	0.00136294	0.0229922	0.00033931	0.0279596	0.000364767	2.01124	0.051076			123	4640.66	23.5828	88064.7	166.271	1666.13	11.9248	469.482	6.25532	14.3333	1.09291	0.052696	0.000285674	0.281779	0.00426177	0.00860275	0.000658838	0.0189194	0.000140042	0.0230366	0.000151131	1.98811	0.0186251
124	871.897	8.79705	16825	46.5181	379.226	5.61529	109.163	2.95709	2.91262	0.485437	0.0518217	0.000542133	0.287858	0.00888664	0.00768045	0.00128512	0.0225395	0.000339516	0.0275975	0.000366134	2.01235	0.0508915			124	4562.44	23.3213	86977.2	164.488	1630.49	11.7929	457.608	6.17542	14.9167	1.11493	0.0524556	0.000285894	0.280657	0.00429715	0.0091486	0.000686993	0.0187461	0.000140145	0.0228108	0.000151201	1.98787	0.0185602
125	844.565	8.64708	16507.2	45.9257	374.353	5.57885	106.042	2.91447	3.64078	0.542735	0.0511633	0.000542832	0.283267	0.00885621	0.00972552	0.00145702	0.0226781	0.000343803	0.0276856	0.000370329	2.01346	0.0507139			125	4498.96	23.1086	85911.8	162.741	1613.49	11.7296	456.86	6.17035	14.75	1.10868	0.0523672	0.000286689	0.28315	0.00434301	0.00914167	0.000690337	0.0187808	0.000141089	0.0228994	0.00015239	1.98766	0.0184933
126	836.814	8.60421	16197.4	45.3462	370.471	5.54966	103.161	2.87457	3.23625	0.511696	0.0516634	0.000550547	0.278458	0.0088094	0.00873548	0.00138739	0.0228722	0.000348558	0.0278047	0.00037456	2.01458	0.0505449			126	4446.18	22.9312	84615.9	160.615	1601.97	11.6865	451.297	6.13253	14.25	1.08973	0.0525455	0.000288775	0.281714	0.00434488	0.00889531	0.00068333	0.0189322	0.00014271	0.0230543	0.000154023	1.98752	0.0184233
127	812.663	8.46961	15870.7	44.7332	359.075	5.46307	108.843	2.95275	3.55987	0.536671	0.0512052	0.000552834	0.303121	0.00942815	0.00991402	0.00150219	0.022625	0.00035008	0.0280469	0.000380013	2.01573	0.0503926			127	4395.8	22.7616	83647	159.025	1576.93	11.5922	435.603	6.02458	14.5	1.09924	0.0525517	0.000289876	0.276234	0.00432657	0.00919508	0.000700347	0.0188522	0.000143145	0.0228586	0.000154136	1.98731	0.01836
128	791.532	8.35052	15659.6	44.3359	364.69	5.50591	99.8794	2.82845	3.39806	0.524332	0.0505462	0.000552123	0.273875	0.00878911	0.00931765	0.00144461	0.0232887	0.000357729	0.0282394	0.000384149	2.01692	0.0502538			128	4343.93	22.5865	82572.9	157.262	1538.96	11.4481	444.986	6.08935	15.6667	1.14261	0.0526071	0.000291307	0.289146	0.00450361	0.01018	0.000746307	0.0186376	0.000143114	0.0228259	0.000154911	1.98709	0.0182987
129	803.607	8.41872	15259.1	43.5799	369.728	5.54406	103.721	2.88238	2.6699	0.464771	0.052664	0.000571852	0.280533	0.00885843	0.00722126	0.00126172	0.02423	0.000369859	0.029475	0.000397446	2.01838	0.0502155			129	4268.76	22.3322	81094.9	154.835	1547.75	11.4816	435.852	6.0263	13.8333	1.07368	0.052639	0.00029315	0.281603	0.00441859	0.0089377	0.000696862	0.0190857	0.000146196	0.0232371	0.000157759	1.98701	0.0182293
130	786.718	8.32322	15031	43.1478	362.048	5.48579	103.801	2.88349	3.15534	0.505259	0.0523395	0.000573756	0.286705	0.00907213	0.00871526	0.00140179	0.0240867	0.000371456	0.029451	0.000400255	2.01981	0.0501706			130	4176.63	22.0193	79637.5	152.442	1514.51	11.3543	428.212	5.97308	14	1.08013	0.0524454	0.000294155	0.28274	0.00447745	0.00924393	0.000716545	0.0190175	0.000147149	0.0231789	0.000158888	1.98692	0.0181621
131	753.511	8.13301	14706.2	42.5303	350.651	5.3982	102.441	2.86451	2.75081	0.47176	0.0512378	0.000572542	0.292144	0.00932536	0.00784487	0.00135079	0.0238438	0.000373492	0.0293079	0.000403729	2.02116	0.0501082			131	4119.82	21.8257	78416.1	150.435	1479.36	11.2184	423.562	5.94045	13.5	1.06066	0.0525379	0.000296019	0.286315	0.00456495	0.00912558	0.000720306	0.0188655	0.000147569	0.0230557	0.000159555	1.98679	0.0180983
132	731.156	8.00305	14406.8	41.9592	341.814	5.32933	98.919	2.8148	2.75081	0.47176	0.0507507	0.000574834	0.289394	0.00939	0.00804768	0.00138586	0.0237259	0.000376316	0.0291144	0.000406527	2.02243	0.0500262			132	4057.74	21.6135	77108	148.284	1453.66	11.118	414.262	5.87465	12.25	1.01036	0.0526241	0.000298011	0.284979	0.00459158	0.00842701	0.000698031	0.0188523	0.000148676	0.0230137	0.000160646	1.98666	0.0180365
133	738.581	8.04639	14011.5	41.2017	342.805	5.3371	95.4777	2.76537	3.07443	0.498739	0.0527125	0.000594823	0.278519	0.00915847	0.00896846	0.00146156	0.024466	0.000387643	0.029714	0.000416205	2.0238	0.0499901			133	3951.95	21.2504	75853.1	146.221	1432.93	11.0365	401.391	5.78237	13.1667	1.04749	0.0521	0.00029761	0.280118	0.00457587	0.00918861	0.000734425	0.0188909	0.000149986	0.0229851	0.000161821	1.98651	0.0179764
134	703.905	7.84244	13732.9	40.6656	341.566	5.32739	99.9594	2.82958	3.39806	0.524332	0.0512567	0.000590894	0.29265	0.00945838	0.00994846	0.0015429	0.024872	0.000394857	0.0305833	0.000426946	2.02534	0.0500304			134	3937.54	21.2008	74647	144.237	1424.98	11.005	401.64	5.78417	11.75	0.98953	0.0527488	0.000301749	0.281857	0.00460596	0.00824576	0.000697332	0.0190895	0.000151972	0.023244	0.000163977	1.98645	0.0179133
135	681.795	7.71024	13472.2	40.1619	337.189	5.29293	94.5173	2.75142	3.9644	0.566343	0.0506076	0.00059186	0.280309	0.00927059	0.0117572	0.00168971	0.0250286	0.000399901	0.0305007	0.000430576	2.02682	0.0500543			135	3912.1	21.1132	73525.4	142.391	1397.29	10.895	388.188	5.68617	11.5	0.978947	0.0532075	0.000305083	0.277815	0.00461006	0.00823023	0.000703537	0.0190042	0.000152682	0.023057	0.000164388	1.98633	0.0178539
136	667.354	7.62295	13057	39.3561	333.638	5.26482	98.5189	2.8091	3.15534	0.505259	0.0511106	0.000603802	0.295287	0.00962299	0.00945737	0.00152173	0.0255523	0.000410506	0.0314882	0.00044442	2.02845	0.0501702			136	3842.04	20.8711	72639.5	140.932	1374.82	10.8049	381.296	5.63532	12.75	1.03078	0.0528919	0.0003051	0.277342	0.00464244	0.00927393	0.000753288	0.0189267	0.000153213	0.0229613	0.000164976	1.98619	0.0177974
137	656.503	7.55684	12709.7	38.6781	321.993	5.17159	88.4348	2.66134	1.94175	0.396358	0.0516537	0.000615001	0.274648	0.00936867	0.00603039	0.00123475	0.0253345	0.000414141	0.0307064	0.00044446	2.02988	0.0501942			137	3803.43	20.7373	71764.9	139.492	1348.05	10.6967	392.008	5.71417	10.4167	0.931697	0.0529985	0.000306776	0.290797	0.0048262	0.00772724	0.00069386	0.0187842	0.000153458	0.0230263	0.000166134	1.98607	0.0177405
138	636.188	7.43184	12435.8	38.1408	320.094	5.15622	90.3556	2.69011	2.75081	0.47176	0.0511579	0.000617873	0.282278	0.00955538	0.00859375	0.0014803	0.0257398	0.000422077	0.0313993	0.000454591	2.0314	0.050277			138	3740.45	20.5185	70955	138.157	1334.2	10.6403	374.736	5.58648	12.8333	1.03414	0.0527158	0.000306853	0.280869	0.00474862	0.00961874	0.000778887	0.0188035	0.000154364	0.0228787	0.00016648	1.98591	0.0176876
139	617.912	7.31797	12036.3	37.3531	302.834	5.0145	90.3556	2.69011	3.23625	0.511696	0.0513372	0.000628517	0.298367	0.0101646	0.0106865	0.00169893	0.0251599	0.000423867	0.0310717	0.000459301	2.03281	0.0503161			139	3682.99	20.3182	69934.2	136.475	1307.76	10.5319	369.92	5.55036	12.5	1.02062	0.0526636	0.000308174	0.282866	0.0048169	0.00955835	0.000784224	0.0186998	0.000154956	0.0227892	0.00016726	1.98572	0.0176377
140	603.553	7.22751	11712.5	36.7105	304.485	5.02823	85.1535	2.61147	2.99353	0.492133	0.0515306	0.000637862	0.279664	0.00974105	0.00983143	0.00162441	0.0259966	0.000436968	0.0316366	0.000469977	2.03428	0.0503987			140	3647.5	20.1942	69006.4	134.946	1309.17	10.5377	362.53	5.49448	10.1667	0.920448	0.0528575	0.00031036	0.276916	0.00475209	0.00776576	0.000705852	0.0189717	0.000157148	0.023009	0.000169184	1.98561	0.0175838
141	589.194	7.13613	11379.5	36.0457	304.981	5.03235	87.4745	2.64684	2.02265	0.404531	0.0517769	0.000648199	0.286819	0.00988526	0.00663207	0.00133092	0.026801	0.000450305	0.0327903	0.000485621	2.03592	0.0505891			141	3567.32	19.9129	68035.4	133.344	1276.26	10.4014	366.183	5.52217	12.5	1.02062	0.0524333	0.000310202	0.28692	0.0049183	0.00979428	0.000803674	0.0187587	0.000157241	0.0229383	0.000170046	1.98547	0.017532
142	572.713	7.0301	11094.1	35.4728	291.767	4.92154	85.3136	2.61392	1.53722	0.352662	0.0516231	0.000654822	0.292403	0.0102269	0.00526864	0.00121197	0.0262992	0.000451516	0.0323207	0.000488039	2.03743	0.0507137			142	3513.56	19.7236	67124.2	131.84	1275.92	10.4001	357.714	5.45775	12.4167	1.01721	0.0523442	0.000311304	0.280356	0.00484963	0.00973151	0.000801173	0.0190084	0.000159372	0.023127	0.000171906	1.98539	0.0174781
143	558.762	6.93932	10865.9	35.0123	288.712	4.89556	81.392	2.5531	2.589	0.457674	0.0514233	0.000659776	0.281915	0.0100524	0.00896742	0.00159251	0.0265703	0.000458605	0.0323951	0.000493763	2.03891	0.0508338			143	3485.41	19.6242	66427	130.69	1256.28	10.3179	352.233	5.41566	10.3333	0.927962	0.0524698	0.000312941	0.280378	0.00488737	0.00822536	0.000741742	0.0189122	0.000159721	0.0230075	0.000172258	1.98527	0.0174267
144	540.405	6.81839	10600.2	34.4735	280.783	4.82754	80.9919	2.54681	2.02265	0.404531	0.0509805	0.000664255	0.28845	0.0103376	0.00720361	0.00144604	0.0264885	0.000463494	0.0324735	0.000500525	2.04036	0.0509491			144	3413.13	19.3681	65620.6	129.358	1254.04	10.3085	349.991	5.39835	10.5	0.935416	0.052013	0.000312456	0.279091	0.00487794	0.00837294	0.00074909	0.0191105	0.000161546	0.0232355	0.000174216	1.98522	0.0173734
145	522.538	6.69899	10290.5	33.8415	283.509	4.85102	77.2304	2.48693	2.42719	0.443141	0.0507786	0.000672064	0.272409	0.00993344	0.00856124	0.00156991	0.0275505	0.000480035	0.0333615	0.000515259	2.04191	0.0511386			145	3417.74	19.3845	64538.6	127.57	1213.34	10.1362	344.677	5.3571	10.6667	0.942811	0.0529565	0.000318073	0.284073	0.00501255	0.00879119	0.000780502	0.0188002	0.000161393	0.0229267	0.000174234	1.9851	0.0173251
146	516.582	6.65881	10050.6	33.349	276.737	4.79245	84.5933	2.60286	2.02265	0.404531	0.0513983	0.000684129	0.305681	0.0107929	0.00730894	0.00146726	0.0275344	0.000485507	0.0341937	0.000527697	2.04356	0.0514032			146	3340.77	19.1106	63697.9	126.181	1208.61	10.1161	347.085	5.37583	11.6667	0.986015	0.0524471	0.000317499	0.287176	0.00505586	0.00965295	0.000819815	0.0189741	0.0001632	0.023206	0.000176501	1.98504	0.0172738
147	496.267	6.5202	9742.65	32.7128	274.507	4.77301	75.3896	2.45709	1.86084	0.388012	0.0509376	0.000690752	0.274637	0.0101451	0.00677885	0.00141839	0.0281758	0.000498959	0.0341732	0.000535995	2.04515	0.0516427			147	3278.37	18.8875	62876.5	124.823	1189.8	10.0353	346.919	5.37454	10.5	0.935416	0.0521399	0.000317724	0.291579	0.00514328	0.00882505	0.000789714	0.0189227	0.000163965	0.0232291	0.000177698	1.98499	0.0172231
148	483.784	6.43381	9489.18	32.1855	265.34	4.69225	78.1907	2.50235	2.50809	0.450466	0.0509827	0.00069972	0.294681	0.0107747	0.00945236	0.0017059	0.0279624	0.000503497	0.0344462	0.000545139	2.04673	0.0518925			148	3277.79	18.8855	61936.9	123.269	1187.97	10.0275	322.921	5.18482	10.9167	0.953795	0.0529215	0.000322593	0.271826	0.0049308	0.00918935	0.000806616	0.0191804	0.000166338	0.023168	0.000178679	1.98493	0.0171738
149	474.647	6.36996	9168.51	31.5136	258.651	4.63244	76.43	2.474	2.589	0.457674	0.0517693	0.00071719	0.295495	0.0109315	0.0100096	0.00177853	0.0282108	0.000514476	0.0347481	0.000556789	2.0483	0.0521519			149	3215.48	18.6617	61074.4	121.841	1160.53	9.90864	331.142	5.25058	10.5833	0.93912	0.0526485	0.000323104	0.285336	0.0051385	0.00911938	0.000812952	0.019002	0.000166609	0.0232023	0.000180009	1.98487	0.017125
150	457.188	6.24645	8946.01	31.044	256.834	4.61607	73.789	2.43085	1.86084	0.388012	0.0511052	0.000720408	0.287302	0.0107817	0.00724531	0.00151635	0.0287093	0.000525522	0.0351607	0.000567306	2.04988	0.0524357			150	3145.34	18.4086	60183.6	120.366	1134.34	9.79393	314.784	5.11891	10.4167	0.931697	0.0522625	0.00032324	0.277504	0.00510931	0.00918305	0.000825175	0.018848	0.000167043	0.0228825	0.000179962	1.98474	0.0170811
151	436.139	6.09476	8705.44	30.533	252.705	4.57864	70.8278	2.38155	3.07443	0.498739	0.0500996	0.000721824	0.280279	0.0107054	0.0121661	0.00198588	0.0290284	0.000535716	0.0353913	0.000577286	2.05145	0.0527219			151	3136.61	18.377	59415.3	119.093	1127.38	9.76322	318.437	5.14861	11.75	0.98953	0.0527913	0.000326897	0.282459	0.00518075	0.0104224	0.000882358	0.0189745	0.000168666	0.0231138	0.000181986	1.98467	0.0170346
152	445.847	6.16512	8470.34	30.0301	258.155	4.62798	72.0283	2.40166	2.34628	0.435693	0.0526363	0.00075139	0.279012	0.0105626	0.00908864	0.00169557	0.0304775	0.000556957	0.0370319	0.000598485	2.0532	0.0531745			152	3076.93	18.1605	58510.6	117.594	1119.25	9.72729	310.549	5.08428	8.91667	0.862008	0.0525876	0.00032788	0.277461	0.00514293	0.00796664	0.000773271	0.019129	0.000170636	0.0232157	0.000183774	1.98463	0.016988
153	409.95	5.90146	8233.48	29.5198	237.757	4.44057	68.1067	2.33533	2.34628	0.435693	0.0497906	0.00073866	0.286455	0.0111849	0.0098684	0.00184176	0.0288768	0.000549178	0.0353868	0.000593405	2.05467	0.0534154			153	3020.38	17.9543	57749	116.331	1108.23	9.67833	310.881	5.087	9.41667	0.885847	0.0523019	0.00032827	0.280521	0.00520306	0.00849707	0.000802775	0.0191904	0.000171994	0.0233523	0.000185521	1.98461	0.0169415
154	411.418	5.91244	7986.37	28.9834	247.667	4.53257	69.3072	2.35583	2.26537	0.428115	0.0515151	0.000763558	0.27984	0.0108032	0.00914685	0.00173668	0.0310112	0.000578589	0.0377449	0.000622644	2.05639	0.053892			154	2971.07	17.7739	56854.6	114.846	1064.12	9.48014	307.726	5.06106	11	0.957429	0.0522574	0.000329961	0.289182	0.00540902	0.0103371	0.000904434	0.0187166	0.000170976	0.0229308	0.000185071	1.9845	0.0168994
155	403.015	5.84937	7775.1	28.5212	236.601	4.42971	69.3872	2.35719	1.61812	0.361823	0.0518341	0.000775977	0.293267	0.0113756	0.00683905	0.00153461	0.0304306	0.000580563	0.0374155	0.000627861	2.05803	0.0542985			155	2927.94	17.6154	55893	113.25	1050.78	9.41941	295.021	4.95523	9.16667	0.874008	0.0523847	0.000332556	0.280764	0.00534536	0.00872369	0.00083544	0.0187998	0.000172777	0.0228796	0.000186355	1.98438	0.0168588
156	391.512	5.76207	7463.5	27.8333	231.893	4.38524	70.3476	2.37346	2.91262	0.485437	0.0524569	0.000796432	0.303362	0.0117332	0.0125602	0.0021068	0.0310703	0.000598874	0.0384775	0.000649887	2.05972	0.0547908			156	2903.9	17.5268	55088	111.912	1045.06	9.39326	299.339	4.99145	10.5833	0.93912	0.052714	0.0003357	0.286432	0.00542592	0.010127	0.000903227	0.0189708	0.000174815	0.0231825	0.000188931	1.98433	0.0168153
157	371.279	5.60569	7258.22	27.3758	228.59	4.35376	67.0663	2.31741	1.94175	0.396358	0.0511529	0.000796057	0.293391	0.0115759	0.00849446	0.00174146	0.031494	0.000611488	0.0387518	0.00066185	2.06139	0.0552803			157	2836.32	17.2768	54099.4	110.269	1040.5	9.37237	287.714	4.89334	8.66667	0.849838	0.052428	0.000336758	0.276515	0.00532172	0.00832934	0.000820198	0.0192331	0.000177624	0.0233283	0.000191247	1.98431	0.0167718
158	364.834	5.55508	7034.01	26.872	221.322	4.28371	66.8262	2.31326	1.94175	0.396358	0.0518671	0.000814224	0.301941	0.0119749	0.00877339	0.00179889	0.0314646	0.000620749	0.0389451	0.000673661	2.06303	0.0557569			158	2782.49	17.0766	53282.3	108.909	1029.14	9.32016	289.209	4.90606	10	0.912872	0.0522217	0.000337802	0.281019	0.00540392	0.00971682	0.000891375	0.0193149	0.000179321	0.0235148	0.00019347	1.98433	0.0167289
159	343.867	5.38759	6853.8	26.4637	222.974	4.29973	63.5449	2.25572	2.6699	0.464771	0.0501717	0.000809592	0.284988	0.0115128	0.011974	0.00209716	0.0325329	0.000639803	0.0398072	0.000690932	2.06472	0.0562992			159	2737.46	16.9084	52544.4	107.681	1002.37	9.19596	284.143	4.86281	9.50001	0.889758	0.052098	0.000339042	0.283472	0.00550442	0.00947756	0.000891904	0.0190766	0.000179326	0.0232718	0.000193686	1.9843	0.0166869
160	337.503	5.33584	6639.7	25.9747	217.276	4.24422	57.4625	2.14499	2.50809	0.450466	0.0508311	0.000827864	0.264468	0.0111422	0.0115434	0.00208547	0.0327237	0.000651911	0.0393766	0.000697807	2.0663	0.0567552			160	2694.91	16.7488	51358.8	105.706	987.53	9.12646	278.829	4.81702	6.83334	0.754616	0.0524722	0.000343531	0.28235	0.00553193	0.00691962	0.000766816	0.0192281	0.000182053	0.0234278	0.00019647	1.9843	0.0166453
161	326.897	5.24862	6397.61	25.4161	223.387	4.30373	59.7034	2.18644	2.10356	0.412542	0.0510968	0.000845144	0.267264	0.0110594	0.00941666	0.00185565	0.0349173	0.000686862	0.0420983	0.00073602	2.0681	0.0574928			161	2658.2	16.6106	50418.4	104.138	973.687	9.06116	270.276	4.7424	8.66667	0.849838	0.0527227	0.000346985	0.27758	0.00551318	0.00890088	0.000876725	0.0193121	0.000184093	0.0234371	0.000198234	1.98431	0.0166044
162	313.273	5.13466	6176.04	24.8993	211	4.18223	59.1432	2.17615	1.3754	0.333585	0.0507239	0.000856165	0.2803	0.0117148	0.00651852	0.00158625	0.0341642	0.000691036	0.0416289	0.000744586	2.06978	0.058118			162	2576.62	16.3016	49445.9	102.514	940.696	8.90375	275.591	4.7889	8.41667	0.837491	0.05211	0.000346936	0.292965	0.00579702	0.00894729	0.000894307	0.0190247	0.00018434	0.02338	0.000199858	1.9843	0.0165642
163	300.464	5.02544	5981.98	24.4422	210.091	4.17318	58.2628	2.15989	1.69903	0.370759	0.0502283	0.000864803	0.277322	0.0116635	0.00808711	0.00177205	0.0351207	0.000712233	0.0427149	0.000766958	2.07151	0.0588274			163	2516.7	16.073	48322.2	100.637	911.02	8.7599	256.16	4.61664	7.41667	0.786166	0.0520817	0.00034986	0.28118	0.00574369	0.00814106	0.000866495	0.018853	0.000185484	0.0229584	0.000200135	1.98422	0.0165274
164	291.654	4.94907	5757.48	23.9076	206.87	4.14095	59.6234	2.18497	1.53722	0.352662	0.0506565	0.000884953	0.288216	0.012035	0.00743083	0.00171123	0.0359307	0.000734543	0.0440549	0.000794164	2.07329	0.0596475			164	2506	16.032	47505.1	99.2707	914.999	8.77931	256.741	4.62188	7.08334	0.768296	0.0527522	0.000355028	0.280592	0.00572392	0.00774136	0.000842948	0.019261	0.00018914	0.0234296	0.000203905	1.98422	0.0164885
165	285.127	4.89182	5629.26	23.5993	203.98	4.11181	54.8215	2.0951	1.94175	0.396358	0.0506509	0.000894566	0.268759	0.0116123	0.00951932	0.00195258	0.0362357	0.000746066	0.0437579	0.000800384	2.07501	0.0603818			165	2444.18	15.7944	46886.4	98.2353	896.182	8.68714	252.174	4.58051	7.16667	0.772802	0.0521299	0.000354129	0.281388	0.00579342	0.00799689	0.000865805	0.0191139	0.000189559	0.0232788	0.000204542	1.98419	0.0164504
166	282.435	4.86803	5445.63	23.1541	190.601	3.97421	55.0615	2.09968	1.21359	0.313348	0.0518644	0.00092073	0.288884	0.0125553	0.00636718	0.00164935	0.0350007	0.000744816	0.0428876	0.000804441	2.07659	0.0609683			166	2405.01	15.643	45919.9	96.6164	904.305	8.72704	252.424	4.58277	7.25	0.777282	0.0523739	0.000358037	0.279135	0.0057392	0.00801721	0.00086301	0.0196931	0.000194514	0.0239365	0.000209658	1.98428	0.0164157
167	263.099	4.69398	5279.66	22.7475	197.538	4.04613	56.6622	2.13	2.10356	0.412542	0.0498326	0.000914626	0.286842	0.0122795	0.0106489	0.00209978	0.0374149	0.000783133	0.0458617	0.000847045	2.07837	0.0618552			167	2378.25	15.5391	45096.7	95.2362	872.475	8.56968	253.752	4.59484	6.66667	0.745357	0.0527368	0.000362125	0.290842	0.00599136	0.00764111	0.000857593	0.0193467	0.000194371	0.0237225	0.000210418	1.98433	0.0163796
168	266.2	4.72228	5098.82	22.2998	188.537	3.95255	53.3009	2.06582	1.3754	0.333585	0.052208	0.000953882	0.282708	0.0124574	0.00729516	0.00177593	0.0369765	0.000791878	0.0450767	0.000853059	2.08002	0.0625869			168	2323.52	15.3257	44479.2	94.1999	863.854	8.52659	240.716	4.47502	6.66667	0.745357	0.0522383	0.000361885	0.278653	0.00586518	0.00771736	0.000866183	0.0194215	0.000196061	0.0236006	0.000211301	1.98436	0.0163433
169	246.946	4.54399	4917.65	21.846	184.738	3.91239	51.6202	2.03298	1.86084	0.388012	0.0502163	0.000950564	0.279424	0.0124949	0.0100729	0.00211115	0.0375663	0.000812897	0.045765	0.000876308	2.08166	0.0633394			169	2306.23	15.2581	43738.4	92.9557	851.668	8.46533	243.705	4.50277	7.08334	0.768296	0.0527279	0.000366405	0.28615	0.00600351	0.00831701	0.000905887	0.0194719	0.000197919	0.0237894	0.000213853	1.98442	0.0163086
170	245.314	4.52859	4728.66	21.3668	183.086	3.89481	51.14	2.0235	1.3754	0.333585	0.0518782	0.000985961	0.279322	0.0125482	0.00751234	0.00182901	0.0387183	0.000842035	0.0470903	0.000906313	2.08333	0.0641846			170	2243.68	15.0119	43045.4	91.7908	842.799	8.42048	237.726	4.4471	7.75	0.803639	0.0521236	0.00036603	0.282068	0.005982	0.00919556	0.000957951	0.0195793	0.000200024	0.0238584	0.000215898	1.98449	0.016275
171	231.445	4.39571	4576.84	20.9771	183.004	3.89393	50.8999	2.01874	1.77994	0.379483	0.0505688	0.000987995	0.278136	0.0125184	0.00972624	0.00208394	0.0399847	0.000870303	0.0486459	0.000937617	2.08506	0.0651529			171	2224.58	14.9364	42250.1	90.4527	833.266	8.37202	223.527	4.312	6.41667	0.731248	0.0526527	0.00037106	0.268254	0.00583463	0.00770062	0.000880972	0.0197222	0.000202602	0.0237617	0.000217335	1.98454	0.0162412
172	227.692	4.35912	4479.41	20.7247	181.104	3.8736	49.6994	1.99478	1.13269	0.302723	0.050831	0.00100116	0.274425	0.0124809	0.00625434	0.00167689	0.0404304	0.000884758	0.0490331	0.000951561	2.08678	0.0661121			172	2171.74	14.7264	41519.1	89.2213	806.492	8.23448	231.333	4.38677	6.5	0.735981	0.0523071	0.000372075	0.286838	0.00617766	0.0080596	0.000916273	0.0194246	0.000202675	0.0237538	0.000219134	1.98459	0.0162077
173	213.334	4.21645	4307.07	20.2737	171.194	3.76579	50.0996	2.0028	1.77994	0.379483	0.0495311	0.00100634	0.292648	0.0133532	0.0103972	0.00222845	0.0397472	0.00089412	0.0489543	0.000969838	2.08842	0.0669881			173	2126.89	14.547	40888.3	88.1578	807.736	8.24091	228.26	4.35749	6.91667	0.759204	0.0520169	0.000373033	0.282593	0.00611681	0.00856304	0.000943968	0.0197547	0.000205998	0.0240844	0.000222414	1.98469	0.016178
174	210.234	4.18506	4115.58	19.7651	176.314	3.82187	50.2597	2.006	2.10356	0.412542	0.0510824	0.00104605	0.285057	0.012947	0.0119308	0.00235406	0.0428406	0.000951152	0.0523771	0.00102735	2.09021	0.0681975			174	2103.26	14.4521	40266.1	87.1077	788.256	8.13954	220.953	4.28705	6.83334	0.754616	0.052234	0.000376282	0.280307	0.00616091	0.00866893	0.0009615	0.0195762	0.000206532	0.0238193	0.000222728	1.98475	0.016146
175	203.463	4.11573	4006.98	19.473	168.634	3.73744	45.6178	1.91108	1.2945	0.323625	0.0507771	0.00105637	0.270514	0.0128209	0.00767638	0.00192662	0.0420851	0.000954893	0.0508858	0.00102558	2.09185	0.0691516			175	2082.03	14.3665	39241.1	85.3756	768.859	8.0374	221.202	4.28947	6.75	0.750001	0.0530574	0.000383877	0.287702	0.00633803	0.00877924	0.00097978	0.0195932	0.00020921	0.023959	0.00022611	1.98483	0.0161156
176	197.915	4.05812	3887.78	19.1491	161.119	3.65297	45.1376	1.90099	1.69903	0.370759	0.0509069	0.00107351	0.280151	0.0133998	0.0105452	0.00231354	0.0414423	0.000961518	0.0504825	0.00103652	2.09342	0.0700006			176	1985.24	13.9731	38563.3	84.2288	749.711	7.93535	218.96	4.26764	6.41667	0.731248	0.0514799	0.000379386	0.29206	0.00647761	0.00855885	0.00097957	0.019441	0.00021011	0.0238892	0.000227828	1.98489	0.016085
177	192.857	4.00493	3740.85	18.7449	160.871	3.65015	45.4578	1.90772	0.970874	0.280267	0.0515543	0.00110132	0.282573	0.013481	0.00603511	0.00174756	0.0430038	0.000999264	0.0524515	0.00107775	2.09504	0.070995			177	1966.64	13.8968	37611.8	82.6165	732.056	7.84013	208.581	4.16509	6.83334	0.754616	0.0522877	0.000386919	0.284925	0.00645623	0.00933445	0.00103565	0.0194635	0.000212788	0.0237664	0.000229881	1.98494	0.016054
178	184.536	3.91596	3625.19	18.4227	153.521	3.56555	44.4974	1.88746	1.13269	0.302723	0.0509037	0.00111075	0.289845	0.0140167	0.00737805	0.0019793	0.0423484	0.00100682	0.0519771	0.00108968	2.09659	0.0718734			178	1931.24	13.7511	36774.3	81.1951	720.865	7.77921	197.62	4.054	6.83334	0.754616	0.0525161	0.000391497	0.274143	0.00635447	0.00947935	0.00105181	0.0196024	0.000215921	0.0237301	0.000232194	1.98498	0.0160233
179	172.543	3.78432	3516.34	18.1161	154.264	3.5742	44.7375	1.89254	1.53722	0.352662	0.049069	0.0011055	0.290005	0.0139877	0.00996482	0.00229772	0.0438707	0.00104128	0.0539464	0.00112927	2.09819	0.0728971			179	1865.24	13.4771	35821.7	79.5756	700.143	7.66518	200.942	4.08798	6	0.707107	0.0520701	0.000393608	0.287001	0.00663055	0.00856969	0.0010143	0.0195452	0.000218342	0.0239097	0.000236127	1.98504	0.0159942
180	175.154	3.81334	3380.59	17.7287	153.438	3.56459	44.0172	1.87724	1.21359	0.313348	0.0518115	0.00116027	0.286872	0.0139319	0.00790931	0.00205042	0.045388	0.00108096	0.0555314	0.00116787	2.09981	0.0740177			180	1817.09	13.2754	34967.7	78.1212	693.014	7.62558	196.79	4.04546	5.91667	0.70218	0.0519648	0.000397002	0.283963	0.00662113	0.00853759	0.00101757	0.0198187	0.000222524	0.0241895	0.000240384	1.98514	0.0159684
181	166.669	3.71827	3250.74	17.3526	145.345	3.46906	42.8167	1.85146	1.45631	0.343256	0.0512712	0.00117611	0.294586	0.01455	0.0100197	0.00237373	0.0447115	0.00109352	0.0550599	0.00118563	2.10135	0.0750051			181	1791.82	13.1689	34038	76.5348	675.524	7.52758	191.144	3.98691	5.83333	0.697217	0.0526419	0.00040459	0.282956	0.00669141	0.00863527	0.00103659	0.0198462	0.000225609	0.0241885	0.000243453	1.98523	0.0159429
182	156.471	3.6009	3160.38	17.0876	141.051	3.41729	42.0164	1.83407	1.05178	0.291711	0.0495103	0.00117041	0.297881	0.0148714	0.00745674	0.002076	0.044631	0.00110789	0.0551931	0.00120485	2.10284	0.0759429			182	1756.52	13.0192	33226.8	75.148	667.235	7.4807	180.349	3.87253	5.66667	0.687185	0.0528645	0.000409665	0.270293	0.00654736	0.00849276	0.00103429	0.0200812	0.000229676	0.0242283	0.000246515	1.98533	0.0159182
183	150.516	3.53066	3051.37	16.7641	142.372	3.4333	40.3357	1.797	1.86084	0.388012	0.0493273	0.00118839	0.283312	0.0143523	0.0130703	0.0027435	0.0466585	0.001154	0.0570626	0.00124819	2.10438	0.0769989			183	1707.71	12.8108	32298.4	73.5575	627.531	7.25218	178.19	3.84925	5	0.645498	0.0528729	0.000414514	0.283955	0.0069566	0.00796774	0.00103275	0.0194292	0.000228855	0.0236934	0.00024698	1.98536	0.0158895
184	154.024	3.57219	2930.68	16.4006	144.932	3.46411	41.7763	1.82882	1.53722	0.352662	0.0525557	0.00125388	0.288247	0.0143767	0.0106064	0.00244646	0.0494535	0.00121398	0.0605273	0.0013119	2.10601	0.0783451			184	1639.65	12.5169	31559.2	72.2885	616.506	7.18749	174.703	3.81134	5.75	0.692219	0.0519547	0.000414085	0.283375	0.00700954	0.00932675	0.00112806	0.0195349	0.000232101	0.0238325	0.000250649	1.9854	0.0158619
185	145.295	3.46798	2854.2	16.1673	134.692	3.33918	41.3762	1.82003	1.2945	0.323625	0.0509057	0.00124879	0.307191	0.0155109	0.0096108	0.00241448	0.0471909	0.00120007	0.0586993	0.00130852	2.10751	0.0794168			185	1607.14	12.3751	30432.3	70.3492	608.466	7.13996	167.645	3.73346	4.83333	0.634648	0.0528103	0.000424573	0.27552	0.00693551	0.00794348	0.00104719	0.0199941	0.000239127	0.0242236	0.000257209	1.98549	0.015838
186	143.418	3.4452	2731.66	15.7884	127.838	3.25291	38.1749	1.74819	1.05178	0.291711	0.0525023	0.0012972	0.29862	0.0156443	0.00822746	0.00229147	0.0467985	0.00122115	0.0577419	0.00132482	2.10891	0.0803185			186	1553.73	12.1401	29358.5	68.4954	602.415	7.10399	170.966	3.77031	6.5	0.735981	0.0529225	0.000431552	0.283801	0.00709728	0.0107899	0.00122832	0.0205193	0.000246664	0.0250186	0.000266194	1.98566	0.0158278
187	136.076	3.35462	2651.74	15.5376	129.902	3.27913	37.2145	1.72605	1.86084	0.388012	0.0513159	0.00130031	0.286481	0.0151278	0.0143249	0.00300877	0.0489876	0.00126947	0.0599455	0.00137248	2.11035	0.0813614			187	1524.76	12.0115	28445.2	66.9138	580.698	6.97343	162.165	3.67184	5.5	0.677004	0.0536034	0.000440694	0.279258	0.00715741	0.00947136	0.00117138	0.0204147	0.000249813	0.0247869	0.00026891	1.9858	0.0158126
188	119.434	3.14019	2563.66	15.2578	121.974	3.17726	36.6543	1.713	1.45631	0.343256	0.0465872	0.00125588	0.300509	0.0160782	0.0119395	0.0028313	0.0475782	0.00127129	0.0591215	0.00138842	2.11171	0.0822578			188	1441.06	11.6353	27548.6	65.3567	557.986	6.83433	150.374	3.53567	5.66667	0.687185	0.0523096	0.00044021	0.269493	0.00714467	0.0101556	0.00123781	0.0202546	0.000252693	0.0244349	0.000271264	1.9859	0.0157918
189	121.881	3.17259	2433.39	14.8368	122.47	3.18373	36.014	1.69797	1.53722	0.352662	0.0500869	0.00133906	0.294065	0.0158323	0.0125518	0.00289801	0.0503287	0.00134385	0.0620222	0.0014593	2.11311	0.0833294			189	1410.53	11.4962	26701.7	63.8812	540.58	6.72585	149.875	3.5298	5.08333	0.650855	0.0528254	0.000448708	0.277249	0.00738482	0.00940349	0.00120966	0.0202452	0.000256503	0.0245607	0.000276083	1.98601	0.0157729
190	122.778	3.18439	2392.05	14.7013	120.818	3.16214	35.6939	1.69041	1.13269	0.302723	0.0513278	0.00136811	0.295435	0.0159858	0.00937514	0.0025176	0.0505083	0.0013579	0.0622357	0.00147358	2.1145	0.0843709			190	1346.5	11.2012	25833	62.363	514.47	6.55989	142.817	3.44559	3.33333	0.527046	0.0521232	0.000451487	0.277601	0.0075752	0.00647916	0.00102777	0.0199152	0.000258446	0.0241832	0.00027839	1.98607	0.0157498
191	117.476	3.11404	2258.68	14.2576	119.579	3.14585	30.0917	1.55206	1.3754	0.333585	0.0520108	0.00141725	0.251646	0.0145702	0.011502	0.00280601	0.0529422	0.00143232	0.0629888	0.00152614	2.11583	0.0853799			191	1307.74	11.0202	24925.3	60.7709	509.165	6.52568	138.001	3.38693	4	0.577351	0.0524661	0.00046026	0.271035	0.00750432	0.007856	0.00113838	0.0204276	0.000266504	0.0246699	0.000286222	1.98618	0.0157325
192	111.847	3.03766	2183.97	14.0044	113.964	3.07094	32.4927	1.6128	1.13269	0.302723	0.0512126	0.00142913	0.285114	0.0161029	0.00993901	0.00266978	0.052182	0.00144539	0.0637928	0.00156246	2.11715	0.0863896			192	1273.09	10.8568	24110.3	59.3358	483.221	6.35579	130.944	3.29909	4.33333	0.600926	0.0528028	0.000468672	0.270981	0.00770166	0.00896761	0.00124916	0.0200421	0.000268188	0.0241956	0.000287914	1.98625	0.01571
193	105.565	2.9502	2102.95	13.7258	114.872	3.08318	32.8928	1.6227	1.21359	0.313348	0.0501983	0.00144064	0.286343	0.0160815	0.0105647	0.0027425	0.0546241	0.00150884	0.0669068	0.00163391	2.11851	0.0875924			193	1227.58	10.6397	23197.7	57.7226	463.576	6.22418	131.94	3.31163	2.91667	0.493007	0.0529183	0.000477182	0.284613	0.00810152	0.00629167	0.00106683	0.0199838	0.000272879	0.0243812	0.000294536	1.98633	0.0156894
194	101.731	2.89558	2020.1	13.4361	111.899	3.04294	31.6123	1.5908	0.809061	0.255848	0.0503593	0.001472	0.282507	0.0161593	0.00723028	0.00229485	0.055393	0.00155074	0.0676358	0.00167652	2.11985	0.0887709			194	1155.65	10.2907	22286.1	56.1038	454.459	6.16217	133.85	3.33554	3.58333	0.546454	0.0518553	0.000479851	0.294526	0.00835573	0.00788484	0.00120717	0.020392	0.000281228	0.0250966	0.000305085	1.98646	0.0156787
195	100.425	2.87675	1915.22	13.0623	102.98	2.91892	29.3714	1.53336	1.21359	0.313348	0.0524354	0.00154403	0.285214	0.016943	0.0117847	0.00306108	0.0537694	0.00156756	0.0656622	0.00169282	2.12106	0.0896947			195	1127.34	10.1511	21448.3	54.6089	430.67	5.99745	126.045	3.23672	3.41667	0.533594	0.0525611	0.000491841	0.292671	0.00854956	0.00793338	0.0012439	0.0200795	0.000284259	0.02466	0.000307916	1.98655	0.0156614
196	95.2857	2.80145	1841.02	12.7927	107.605	2.98386	28.8912	1.52077	0.889968	0.268335	0.051757	0.00156361	0.268494	0.0159741	0.00827071	0.00250424	0.0584485	0.00167088	0.0704931	0.00179412	2.12235	0.0909313			196	1059.2	9.80985	20362.2	52.6599	410.114	5.85151	115.416	3.09712	3.83333	0.565195	0.0520182	0.000500198	0.281425	0.008553	0.009347	0.00138458	0.020141	0.000292054	0.024533	0.000315094	1.98663	0.0156427
197	89.9829	2.72166	1772.95	12.5412	103.806	2.93062	29.9317	1.54792	0.728155	0.242719	0.0507532	0.00157652	0.288343	0.0169889	0.00701458	0.00234657	0.0585498	0.00170406	0.0717887	0.00184653	2.12364	0.0921891			197	1019.62	9.60782	19411.2	50.942	401.494	5.78924	112.676	3.06011	4	0.577351	0.0525275	0.000513801	0.280642	0.00862944	0.0099628	0.00144516	0.0206837	0.000303142	0.0251664	0.000326808	1.98675	0.0156322
198	79.7038	2.56018	1673.96	12.168	99.2639	2.86567	28.251	1.50382	0.889968	0.268335	0.0476139	0.00156809	0.284605	0.0172344	0.00896567	0.00271562	0.0592988	0.00176534	0.0727134	0.00191611	2.12487	0.0934024			198	988.185	9.44525	18542.5	49.3626	386.325	5.67807	104.041	2.9404	4.58333	0.618017	0.0532931	0.000528773	0.269308	0.00857891	0.0118639	0.00160921	0.0208346	0.000311202	0.0251075	0.00033371	1.98686	0.0156204
199	79.7853	2.5615	1597.66	11.8739	94.7218	2.79923	27.9309	1.49528	0.809061	0.255848	0.0499389	0.00164568	0.294873	0.0180315	0.00854145	0.00271281	0.0592878	0.00180664	0.0731187	0.0019646	2.12605	0.0945547			199	932.226	9.15088	17753.1	47.9181	363.034	5.50311	105.12	2.95563	3.5	0.540062	0.0525106	0.000534584	0.28956	0.00924931	0.00964097	0.00149479	0.0204491	0.000314856	0.0250547	0.000340644	1.98696	0.0156077
																									200	901.12	8.98429	17065.8	46.6526	352.342	5.42095	99.6398	2.87749	4.25	0.595119	0.0528026	0.00054588	0.282793	0.00925345	0.0120622	0.00169921	0.0206461	0.000322625	0.0251563	0.000348006	1.98707	0.0155961
																									201	841.211	8.65698	16296.6	45.2266	336.759	5.29898	96.8997	2.83762	2.91667	0.493007	0.0516189	0.000550191	0.287742	0.00956566	0.00866099	0.00147031	0.0206644	0.000330178	0.0253042	0.00035727	1.98717	0.0155863
																									202	816.195	8.51759	15487.3	43.7146	316.452	5.13581	92.4159	2.77114	3.08333	0.506897	0.0527009	0.000569735	0.292038	0.00995725	0.00974345	0.0016096	0.020433	0.000336592	0.0250785	0.00036444	1.98726	0.0155733
																									203	772.745	8.27137	14737.4	42.3016	310.567	5.08756	85.7732	2.66962	3.41667	0.533594	0.0524343	0.00058108	0.276182	0.00971389	0.0110014	0.00172755	0.0210734	0.000350474	0.0255536	0.000377177	1.98737	0.0155661
																									204	733.575	8.04456	14007.5	40.914	299.212	4.99318	82.784	2.62266	2.58333	0.463981	0.0523703	0.000594328	0.276674	0.00990689	0.0086338	0.00155736	0.0213609	0.000361885	0.0259138	0.000389567	1.9875	0.0155639
																									205	693.253	7.80587	13380.5	39.7115	277.33	4.8062	80.4591	2.58554	2.91667	0.493007	0.0518108	0.000603303	0.29012	0.0105923	0.010517	0.00178701	0.0207265	0.000364424	0.0254225	0.000394612	1.98759	0.015554
																									206	673.093	7.68438	12794.7	38.5784	268.627	4.72982	73.8994	2.47784	2.83333	0.485913	0.0526071	0.000621183	0.275101	0.0104186	0.0105475	0.00181839	0.0209951	0.000375051	0.0254329	0.000403367	1.98768	0.0155439
																									207	642.152	7.49497	12194.8	37.4072	256.94	4.62531	69.7477	2.40719	2.33333	0.440959	0.052658	0.000635477	0.271455	0.0105665	0.00908124	0.00172396	0.0210697	0.000384754	0.0254491	0.000413171	1.98776	0.0155337
																									208	605.616	7.26631	11639.1	36.312	250.641	4.56801	71.7405	2.44136	2.41667	0.448764	0.0520328	0.000645061	0.286228	0.0110494	0.00964196	0.00179907	0.0215344	0.000398179	0.0263282	0.000430425	1.98788	0.0155349
																									209	584.468	7.13131	11131.9	35.3027	240.114	4.47063	63.8524	2.30316	1.75	0.381881	0.0525038	0.000661904	0.265925	0.0107944	0.00728819	0.00159619	0.0215699	0.00040739	0.0259438	0.000436577	1.98798	0.0155298
																									210	555.42	6.94244	10562.1	34.1568	231.163	4.38616	66.5094	2.35062	2.16667	0.424918	0.0525862	0.000678941	0.287717	0.0115414	0.00937291	0.00184676	0.0218861	0.000421262	0.0267751	0.000455415	1.98811	0.0155362
																									211	516.251	6.68093	9955.94	32.9224	218.233	4.26124	58.2891	2.20049	1.58333	0.363242	0.0518536	0.000692611	0.267096	0.0113522	0.00725525	0.00167049	0.0219199	0.000434104	0.0264054	0.000465729	1.98821	0.0155356
																									212	491.236	6.50942	9399.72	31.7743	209.364	4.17342	55.383	2.14491	1.16667	0.311805	0.0522607	0.00071469	0.26453	0.0115223	0.00557243	0.00149343	0.0222734	0.000450333	0.0267666	0.000482459	1.98832	0.0155391
																									213	453.631	6.24426	8828.54	30.5781	199.749	4.07612	55.549	2.14812	1.33333	0.333333	0.0513823	0.000729327	0.278094	0.0121595	0.00667503	0.00167431	0.0226254	0.000468301	0.0275042	0.000504924	1.98845	0.0155529
																									214	429.685	6.07037	8276.72	29.4039	180.935	3.87875	53.3902	2.10595	1.75	0.381881	0.051915	0.000756261	0.29508	0.0132472	0.00967201	0.00212077	0.0218607	0.000475026	0.0269141	0.000515362	1.98855	0.0155556
																									215	396.113	5.81916	7690.81	28.1346	172.812	3.79042	47.5778	1.98797	1.5	0.353554	0.0515047	0.000779744	0.275316	0.0129923	0.00867996	0.00205473	0.0224699	0.000499658	0.0272526	0.000538045	1.98865	0.0155614
																									216	375.706	5.6618	7195.06	27.0401	160.131	3.64828	48.1591	2.00008	1.83333	0.390868	0.0522172	0.000811002	0.300749	0.0142463	0.011449	0.00245483	0.0222556	0.000513906	0.0275124	0.000558651	1.98875	0.0155691
																									217	352.83	5.48077	6728.82	25.9914	154.246	3.58043	42.0977	1.86993	0.666667	0.235702	0.0524357	0.000839328	0.272926	0.0136786	0.00432211	0.00153139	0.0229232	0.00053942	0.0277257	0.000579796	1.98885	0.0155781
																									218	325.018	5.25337	6296.39	24.9998	141.399	3.42769	39.3576	1.80804	1.33333	0.333333	0.0516197	0.00085915	0.278344	0.0144579	0.0094296	0.00236846	0.0224571	0.000551643	0.0272988	0.000594671	1.98894	0.0155799
																									219	313.745	5.15868	5900.76	24.0746	137.089	3.37492	35.8702	1.72605	1.58333	0.363242	0.0531703	0.000900753	0.261657	0.0141429	0.0115497	0.0026649	0.0232324	0.000579747	0.0278315	0.00061986	1.98903	0.0155868
																									220	285.686	4.91601	5487.84	23.0886	127.64	3.25626	36.9496	1.75184	1.33333	0.333333	0.052058	0.000922186	0.289483	0.0155856	0.0104461	0.00262508	0.0232587	0.000601373	0.0285076	0.000650958	1.98913	0.0156005
																									221	272.603	4.79912	5147.39	22.2578	120.098	3.15837	33.8774	1.67741	0.583333	0.220479	0.0529594	0.000960051	0.282082	0.0158148	0.00485716	0.00184027	0.0233317	0.000621826	0.0284087	0.000670517	1.98922	0.015611
																									222	249.645	4.58754	4805.64	21.4058	107.168	2.98317	30.5561	1.59304	0.75	0.25	0.0519485	0.000982261	0.285124	0.0168511	0.00699838	0.00234091	0.0223004	0.000628662	0.0272435	0.000679302	1.98928	0.0156075
																									223	237.961	4.47638	4433.02	20.4534	108.411	3.00046	30.9712	1.60383	1.08333	0.300463	0.0536793	0.00103971	0.285683	0.0167743	0.00999284	0.00278528	0.0244554	0.000686184	0.0298401	0.000740551	1.98938	0.0156324
																									224	216.65	4.26686	4138.72	19.6818	101.366	2.90115	27.6499	1.51537	1.16667	0.311805	0.052347	0.00106059	0.272773	0.0168652	0.0115095	0.00309362	0.0244921	0.000710587	0.0296222	0.000763882	1.98947	0.0156513
																									225	198.054	4.07597	3770.61	18.6889	92.1658	2.76613	25.5741	1.45737	0.75	0.25	0.0525256	0.00111189	0.277479	0.0178714	0.00813751	0.00272348	0.0244432	0.00074354	0.0296674	0.000800685	1.98955	0.0156672
																									226	191.224	4.00376	3553.41	18.0867	87.2757	2.69163	25.9892	1.46915	0.25	0.144338	0.0538143	0.00115955	0.297783	0.0191757	0.00286449	0.00165617	0.0245611	0.000767726	0.0302473	0.000832458	1.98964	0.0156882
																									227	170.077	3.77204	3182.84	17.027	80.5621	2.58588	21.3394	1.33123	0.5	0.204124	0.0534357	0.00121911	0.264881	0.0185833	0.00620639	0.00254157	0.0253114	0.000823651	0.0303919	0.000881718	1.98971	0.0157066
																									228	142.512	3.44825	2834.39	15.987	69.29	2.39792	19.2636	1.26481	0.583333	0.220479	0.0502797	0.00124919	0.278014	0.0206343	0.00841872	0.00319529	0.0244462	0.000857172	0.0297469	0.000925241	1.98978	0.0157145
																									229	129.676	3.28725	2514.76	14.9884	60.5873	2.24211	16.5235	1.1714	0.333333	0.166667	0.0515661	0.00134283	0.272722	0.0218097	0.00550171	0.00275838	0.0240927	0.00090307	0.0291596	0.00097145	1.98983	0.0157151
